# Supplementary material for: Multi‑label classification of biomedical data
Source: Med Int (Lond). 2024 Sep 9;4(6):68. doi: 10.3892/mi.2024.192 (PMC11411592; doi:10.3892/mi.2024.192)
Supplement: Details of the final dataset. [file Supplementary_Data2.xlsx]

## Sheet: Table_S2
Table SII. Details of the final dataset.
AGE	SEX	INF_ANAM	STENOK_AN	FK_STENOK	IBS_POST	GB	SIM_GIPERT	DLIT_AG	ZSN_A	nr_11	nr_01	nr_02	nr_03	nr_04	nr_07	nr_08	np_01	np_04	np_05	np_07	np_08	np_09	np_10	endocr_01	endocr_02	endocr_03	zab_leg_01	zab_leg_02	zab_leg_03	zab_leg_04	zab_leg_06	S_AD_KBRIG	D_AD_KBRIG	S_AD_ORIT	D_AD_ORIT	O_L_POST	K_SH_POST	MP_TP_POST	SVT_POST	GT_POST	FIB_G_POST	ant_im	lat_im	inf_im	post_im	IM_PG_P	ritm_ecg_p_01	ritm_ecg_p_02	ritm_ecg_p_04
77	1	2	1	1	2	3	0	7	0	0	0	0	0	0	0	0	0	0	0	0	0	0	0	0	0	0	0	0	0	0	0	174	97	180	100	0	0	0	0	0	0	1	0	0	0	0	0	0	0
55	1	1	0	0	0	0	0	0	0	0	0	0	0	0	0	0	0	0	0	0	0	0	0	0	0	0	0	0	0	0	0	127	81	120	90	0	0	0	0	0	0	4	1	0	0	0	1	0	0
52	1	0	0	0	2	2	0	2	0	0	0	0	0	0	0	0	0	0	0	0	0	0	0	0	0	0	0	0	0	0	0	150	100	180	100	0	0	0	0	0	0	4	1	0	0	0	1	0	0
68	0	0	0	0	2	2	0	3	1	0	0	0	0	0	0	0	0	0	0	0	0	0	0	0	0	0	1	0	0	0	0	127	76	120	70	0	0	0	0	0	0	0	1	1	0	0	1	0	0
60	1	0	0	0	2	3	0	7	0	0	0	0	0	0	0	0	0	0	0	0	0	0	0	0	0	0	0	0	0	0	0	190	100	160	90	0	0	0	0	0	0	4	1	0	0	0	0	0	0
64	1	0	1	2	1	0	0	0	0	0	0	0	0	0	0	0	0	0	0	0	0	0	0	0	0	0	0	0	0	0	0	139	84	140	90	0	0	0	0	0	0	1	1	0	0	0	0	0	0
70	1	1	1	2	1	2	0	7	1	0	0	0	0	0	0	0	0	0	0	0	0	0	0	0	0	0	1	0	0	0	0	120	80	120	80	0	0	0	0	0	0	0	0	3	0	0	1	0	0
65	1	0	1	1	2	2	0	7	0	0	0	0	0	0	0	0	0	0	0	0	0	0	0	0	0	0	0	0	0	0	0	153	90	145	95	0	0	0	0	0	0	0	0	2	0	0	1	0	0
60	1	0	0	0	2	2	0	6	0	0	0	0	0	0	0	0	0	0	0	0	0	0	0	0	0	0	0	0	0	0	0	200	120	195	120	0	0	0	0	0	0	0	0	3	2	0	1	0	0
77	0	2	0	0	0	3	0	6	1	0	0	0	0	0	0	0	0	0	0	0	0	0	0	1	0	0	0	0	0	0	0	184	99	200	100	0	0	0	0	0	0	4	1	0	0	0	0	0	0
71	1	0	0	0	0	0	0	0	0	0	0	0	0	0	0	0	0	0	0	0	0	0	0	1	0	0	0	0	0	0	0	140	80	140	90	0	0	0	0	0	0	0	0	3	1	0	1	0	0
50	0	0	0	0	0	2	0	3	0	0	0	0	0	0	0	0	0	0	0	0	0	0	0	0	0	0	0	0	0	0	0	140	90	130	80	0	0	0	0	0	0	1	1	0	0	0	1	0	0
60	1	1	0	0	2	2	0	2	0	0	0	0	0	0	0	0	0	0	0	0	0	0	0	0	0	0	0	0	0	0	0	132	80	120	80	0	0	0	0	0	0	1	1	0	0	0	0	0	0
57	1	0	0	0	2	2	0	6	0	0	0	0	0	0	0	0	0	0	0	0	0	0	0	0	0	0	0	0	0	0	0	140	90	125	80	0	0	0	0	0	0	0	1	3	3	0	1	0	0
55	1	1	1	2	2	2	0	1	0	0	0	0	0	0	0	0	0	0	0	0	0	0	0	0	1	0	0	0	0	0	0	140	80	160	100	0	0	0	0	0	0	0	0	2	1	0	1	0	0
57	1	3	0	0	0	2	0	6	0	0	0	0	0	0	0	0	0	0	0	0	0	0	0	0	0	0	0	0	0	0	0	130	81	115	80	0	0	0	0	0	0	4	1	0	0	0	1	0	0
52	1	0	6	2	1	2	0	7	0	0	0	0	0	0	0	0	0	0	0	0	0	0	0	0	0	0	0	0	0	0	0	80	60	110	70	0	0	0	0	0	0	0	0	1	0	0	0	0	0
52	0	1	1	2	2	2	0	7	1	0	0	0	0	0	0	0	0	0	0	0	0	0	0	0	0	0	0	0	0	0	0	150	85	150	90	1	0	0	0	0	0	4	2	0	0	0	1	0	0
54	1	0	1	3	2	2	0	2	0	0	0	0	0	0	0	0	0	0	0	0	0	0	0	0	0	0	0	0	1	0	0	134	81	130	80	0	0	0	0	0	0	4	0	0	0	0	1	0	0
71	0	0	1	4	2	0	0	0	0	0	0	0	0	0	0	0	0	0	0	0	0	0	0	0	0	0	0	1	0	0	0	131	78	120	80	0	0	0	0	0	0	0	0	2	0	0	1	0	0
70	0	0	0	0	2	0	0	0	0	0	0	0	0	0	0	0	0	0	0	0	0	0	0	0	0	1	1	0	0	0	0	150	90	130	80	0	0	0	0	0	0	4	3	0	0	0	1	0	0
83	1	0	0	0	2	0	0	0	1	0	0	0	0	1	0	0	0	0	0	0	0	0	0	0	0	0	0	0	1	0	0	120	80	130	80	0	0	1	0	0	0	0	1	3	0	0	0	1	0
70	0	0	5	2	2	2	0	5	1	0	0	0	0	0	0	0	0	0	0	0	0	0	0	0	0	0	0	0	0	0	0	140	80	120	80	0	0	0	0	0	0	0	1	1	0	0	0	0	0
63	1	0	1	2	0	0	1	5	0	0	0	0	0	0	0	0	0	0	0	0	0	0	0	0	0	0	0	0	0	0	0	140	90	140	100	0	0	0	0	0	0	4	1	0	0	0	1	0	0
67	1	1	6	2	1	0	0	0	1	0	0	0	0	0	0	0	0	0	0	0	0	0	0	1	0	0	0	0	0	0	0	130	80	130	80	1	0	0	0	0	0	1	1	0	0	0	0	0	0
77	1	3	6	2	2	2	0	3	0	0	0	0	0	0	0	0	0	0	0	0	0	0	0	0	0	0	0	0	0	0	0	155	87	150	90	0	0	0	0	0	0	1	1	0	0	0	1	0	0
82	0	1	2	2	1	2	0	7	1	1	0	0	0	0	0	0	0	0	0	0	0	0	0	0	0	0	0	0	0	0	0	190	100	190	100	0	0	0	0	0	0	0	0	3	0	0	0	0	0
53	1	0	0	0	0	3	0	3	0	0	0	0	0	0	0	0	0	0	0	0	0	0	0	0	0	0	0	0	0	0	0	140	90	130	90	0	0	0	0	0	1	4	3	0	0	0	1	0	0
44	1	0	1	2	1	2	0	1	0	0	0	0	0	0	0	0	0	0	0	0	0	0	0	0	0	0	0	0	0	0	0	150	100	140	100	0	0	0	0	0	0	1	1	0	0	0	1	0	0
50	1	2	6	2	1	3	0	6	0	0	0	0	0	0	0	0	0	0	0	0	0	0	0	0	0	0	0	0	0	0	0	144	86	140	90	0	0	0	0	0	0	1	1	0	0	0	0	1	0
64	0	0	0	0	2	2	0	1	0	0	0	0	0	0	0	0	0	0	0	0	0	0	0	0	0	0	0	0	0	0	0	178	98	200	100	0	0	0	0	0	0	4	0	0	0	0	1	0	0
65	1	0	0	0	0	2	0	6	0	0	0	0	0	0	0	0	0	0	0	0	0	0	0	0	0	0	0	0	0	0	0	140	90	150	90	0	0	0	0	0	0	2	1	0	0	0	0	0	0
72	0	0	0	0	2	2	0	7	0	0	0	0	0	0	0	0	0	0	0	0	0	0	0	0	0	0	0	0	0	0	0	160	90	154	92	0	0	0	0	0	0	1	1	0	0	0	1	0	0
39	1	0	0	0	0	0	1	1	0	0	0	0	0	0	0	0	0	0	0	0	0	0	0	0	0	0	0	0	0	0	0	160	90	180	110	0	0	0	0	0	0	0	1	2	0	0	1	0	0
65	1	0	1	0	2	2	0	6	0	1	0	0	0	0	0	0	0	0	0	0	0	0	0	0	0	0	1	0	0	0	0	160	90	180	100	0	0	0	0	0	0	1	1	0	0	0	1	0	0
78	0	0	1	4	2	2	0	7	0	0	0	0	0	0	0	0	0	0	0	0	0	0	0	0	0	0	0	0	0	0	0	120	80	100	70	0	0	0	0	0	0	1	1	0	0	0	1	0	0
44	0	0	5	2	1	3	0	2	1	0	0	0	0	0	0	0	0	0	0	0	0	0	0	1	0	0	0	0	0	0	0	160	90	80	60	1	0	0	0	0	0	4	1	0	0	0	1	0	0
59	1	0	0	0	0	0	0	0	0	0	0	0	1	0	0	0	0	0	0	0	0	0	0	1	0	0	0	0	0	0	0	134	81	130	82	1	0	0	0	0	0	1	1	0	0	0	0	0	0
59	0	1	6	2	2	3	0	7	1	0	0	0	0	0	0	0	0	0	0	0	0	0	0	0	1	0	0	0	0	0	0	155	89	150	92	0	0	0	0	0	0	4	1	0	0	0	1	0	0
78	0	0	0	0	2	0	0	0	1	0	0	0	0	0	0	0	0	0	0	0	0	0	0	0	0	0	0	0	0	0	0	129	76	122	73	0	0	0	0	0	0	0	0	4	1	0	1	0	0
73	0	0	3	2	1	2	0	1	1	0	0	0	0	0	0	0	0	0	0	0	0	0	0	1	1	0	0	0	0	0	0	143	83	139	87	0	0	0	0	0	0	4	2	0	0	0	1	0	0
49	1	0	0	0	0	0	0	0	1	0	0	0	0	0	0	0	0	0	0	0	0	0	0	0	0	0	0	0	0	0	0	125	78	120	78	0	0	0	0	0	0	0	0	3	1	0	1	0	0
72	0	2	4	2	1	2	0	3	0	0	0	0	0	0	0	0	0	0	0	0	0	0	0	0	0	0	0	0	0	0	0	143	82	131	81	0	0	1	0	0	0	4	1	0	0	0	1	0	0
41	1	0	0	0	0	0	0	0	0	0	0	0	0	0	0	0	0	0	0	0	0	0	0	0	0	0	0	0	0	0	0	116	75	118	77	0	0	0	0	0	0	0	0	4	1	0	0	1	0
63	0	2	3	2	1	2	0	7	0	0	0	0	0	0	0	0	0	0	0	0	1	0	0	1	0	0	0	0	0	0	0	145	85	142	85	0	0	0	0	0	0	0	0	1	0	0	0	0	0
70	0	0	6	2	2	3	0	7	0	0	0	0	0	0	0	0	0	0	0	0	0	0	0	0	0	0	0	0	0	0	0	156	89	150	91	0	0	0	0	0	0	4	0	0	0	0	1	0	0
43	1	0	0	0	0	2	0	3	0	0	0	0	0	0	0	0	0	0	0	0	0	0	0	0	0	0	0	0	0	0	0	138	86	138	90	0	0	0	0	0	0	4	1	0	0	0	0	0	0
72	0	1	2	2	1	0	0	0	0	0	0	0	0	0	0	0	0	0	0	0	0	0	0	0	0	1	0	0	0	0	0	128	76	125	76	0	0	0	0	0	0	0	0	1	0	0	1	0	0
63	0	2	3	2	1	2	0	2	0	0	0	0	0	0	0	0	0	0	0	0	0	0	0	0	0	0	0	0	0	0	0	141	83	136	84	0	0	0	0	0	0	1	0	0	0	0	1	0	0
56	1	0	0	0	0	0	0	0	1	0	0	0	0	0	0	0	0	0	0	0	0	0	0	0	0	0	0	0	0	0	1	121	76	120	77	0	0	0	0	0	0	4	1	0	0	0	0	0	0
67	1	3	6	2	2	0	0	0	1	0	0	0	0	0	0	0	0	0	0	0	0	0	0	0	0	0	0	0	0	0	1	116	71	113	69	0	0	0	0	0	0	0	0	1	0	0	0	0	0
72	0	0	6	2	1	3	0	7	1	0	0	0	0	0	0	0	0	0	0	0	0	0	0	1	0	0	0	0	0	0	0	158	89	154	91	0	0	0	0	0	0	1	0	0	0	0	1	0	0
43	1	3	6	2	2	0	0	0	0	1	0	0	0	0	0	0	0	0	0	0	0	0	0	0	0	0	0	0	0	0	0	126	78	125	80	0	0	0	0	0	0	1	0	0	0	0	0	0	0
65	0	0	0	0	2	0	0	0	1	0	0	0	0	0	0	0	0	0	0	0	0	0	0	0	0	0	0	0	0	0	0	136	80	132	82	0	0	0	0	0	0	0	0	2	0	0	1	0	0
55	1	0	0	0	0	0	0	0	1	0	0	0	0	0	0	0	0	0	0	0	0	0	0	0	0	0	1	0	0	0	0	122	76	122	77	0	0	0	0	0	0	0	0	4	1	0	1	0	0
58	1	0	0	0	2	2	0	7	0	0	0	0	0	0	0	0	0	0	0	0	0	0	0	0	0	0	1	0	0	0	0	148	87	143	87	0	0	0	0	0	0	0	0	3	0	0	1	0	0
71	0	2	3	2	1	2	0	2	0	0	0	0	0	0	0	0	0	0	0	0	0	0	0	1	0	0	0	0	0	0	0	132	77	124	75	0	0	0	1	0	0	0	0	1	0	0	1	0	0
55	1	0	6	4	2	2	0	7	0	0	0	0	0	0	0	0	0	0	0	0	0	0	0	0	0	0	0	0	0	0	0	147	87	148	90	0	0	0	0	0	0	1	0	0	0	0	1	0	0
44	1	0	1	2	2	0	0	0	0	0	0	0	0	0	0	0	0	0	0	0	0	0	0	0	0	0	0	0	0	0	0	134	83	134	87	0	0	0	0	0	0	1	0	0	0	0	1	0	0
60	1	0	0	0	0	2	0	1	0	0	0	0	0	0	0	0	0	0	0	0	0	0	0	0	0	0	0	0	0	0	0	142	84	142	88	0	0	0	0	0	0	1	1	0	0	0	1	0	0
57	1	0	6	2	2	2	0	7	0	0	0	0	0	0	0	0	0	0	0	0	0	0	0	0	0	0	1	0	0	0	0	153	89	152	92	0	0	0	0	0	0	1	1	1	0	0	1	0	0
48	1	1	2	2	1	0	0	0	0	0	0	0	0	0	0	0	0	0	0	0	0	0	0	0	0	0	0	0	0	0	0	122	76	121	77	0	0	0	0	0	0	0	0	3	0	0	1	0	0
45	1	1	2	2	2	2	0	2	0	0	0	0	0	0	0	0	0	0	0	0	0	0	0	0	0	0	0	0	0	0	0	138	85	138	88	0	0	0	0	0	0	1	1	0	0	0	1	0	0
55	1	0	0	0	0	2	0	1	0	0	0	0	0	0	0	0	0	0	0	0	0	0	0	0	0	0	0	0	0	0	0	138	83	137	85	0	0	0	0	0	0	0	1	0	0	0	1	0	0
58	0	0	6	2	1	2	0	7	1	0	0	0	0	0	0	0	0	0	0	0	0	0	0	1	1	0	0	0	0	0	0	123	76	128	76	0	0	0	0	0	0	0	0	4	0	1	0	0	0
70	1	1	3	2	1	2	0	2	1	0	0	0	0	0	0	0	0	0	0	0	0	0	0	0	0	0	0	0	0	0	0	130	77	125	76	0	0	0	0	0	0	0	0	1	1	0	1	0	0
76	0	2	2	4	2	2	0	5	1	0	0	0	0	0	0	0	0	0	0	0	0	0	0	1	0	0	0	0	0	0	0	140	81	133	80	0	0	0	0	0	0	1	1	0	0	0	1	0	0
62	1	1	4	2	2	3	0	6	0	0	0	0	0	0	0	0	0	0	0	0	0	0	0	0	0	0	0	0	0	0	0	147	87	147	89	0	0	0	0	0	0	0	0	4	0	0	1	0	0
60	1	0	0	0	0	0	0	0	0	0	0	0	0	0	0	0	0	0	0	0	0	0	0	1	0	0	0	0	0	0	0	127	79	129	80	0	0	0	0	0	0	0	1	4	0	0	1	0	0
47	1	0	0	0	0	2	0	1	0	0	0	0	0	0	0	0	0	0	0	0	0	0	0	0	0	0	0	0	0	0	0	137	84	136	87	0	0	0	0	0	0	0	0	2	0	0	1	0	0
61	1	0	3	2	2	2	0	7	1	0	0	0	0	0	0	0	0	0	0	0	0	0	0	0	1	0	0	0	0	0	0	144	85	144	86	0	0	0	0	0	0	0	0	2	2	0	1	0	0
59	0	0	4	2	0	2	0	1	0	0	0	0	0	0	0	0	0	0	0	0	0	0	0	0	0	0	0	0	0	0	0	135	82	138	86	0	0	0	0	0	0	4	1	0	0	0	1	0	0
65	1	0	1	3	2	2	0	1	1	0	0	0	0	0	0	0	0	0	0	0	0	0	0	0	0	0	0	0	0	0	0	139	82	136	86	0	0	0	0	0	0	4	1	0	0	0	0	0	0
61	1	0	0	0	0	2	0	1	0	1	0	0	0	0	0	0	0	0	0	0	0	0	0	0	0	0	0	0	0	0	0	134	81	132	83	0	0	0	0	0	0	4	1	0	0	0	1	0	0
61	1	0	0	0	2	0	0	0	0	0	0	0	0	0	0	0	0	0	0	0	0	0	0	0	0	0	0	0	0	0	0	136	81	130	81	0	0	0	0	0	0	0	0	1	0	0	1	0	0
54	1	0	0	0	0	2	0	2	0	0	0	0	0	0	0	0	0	0	0	0	0	0	0	0	0	0	0	0	0	0	0	138	84	138	86	0	0	0	0	0	0	1	1	0	0	0	1	0	0
63	0	0	6	2	1	0	0	0	1	0	0	0	0	0	0	0	0	0	0	0	0	0	0	1	0	0	0	0	0	0	0	133	79	131	81	0	0	0	0	0	0	4	1	0	0	0	1	0	0
55	1	1	2	2	1	0	0	0	0	0	0	0	0	0	0	0	0	0	0	0	0	0	0	0	0	0	0	0	0	0	0	129	79	128	81	0	0	0	0	0	0	2	1	0	0	0	1	0	0
73	0	0	0	0	2	0	1	6	1	0	0	0	0	0	0	0	0	0	0	0	0	0	0	0	0	0	0	0	0	0	0	147	85	142	84	0	0	0	0	0	0	2	1	0	0	0	1	0	0
56	1	2	6	2	2	2	0	7	1	0	0	0	0	0	0	0	0	0	0	0	0	0	0	0	0	0	0	0	0	0	0	152	88	148	90	0	0	0	0	0	0	1	1	0	0	0	1	0	0
59	1	0	0	0	2	2	0	6	1	0	0	0	0	0	0	0	0	0	0	0	0	0	0	0	0	0	0	0	0	0	0	147	87	143	89	1	0	1	0	0	0	4	1	0	0	0	0	0	0
62	1	1	0	0	2	3	0	7	1	0	0	0	0	0	0	0	0	0	0	0	0	0	0	0	0	0	0	0	0	0	0	146	87	142	86	0	0	0	0	0	0	0	0	2	0	1	1	0	0
80	0	0	5	2	1	2	0	7	0	0	0	0	0	0	0	0	0	0	0	0	0	0	0	0	0	0	0	0	0	0	0	152	86	145	85	0	0	0	0	0	0	4	1	0	0	0	1	0	0
46	1	2	2	2	2	2	0	1	0	0	0	0	0	0	0	0	0	0	0	0	0	0	0	0	0	0	0	0	0	0	0	132	82	131	85	0	0	0	0	0	0	4	1	0	0	0	1	0	0
72	1	0	6	2	2	0	0	0	1	0	0	0	0	0	0	0	0	0	0	0	0	0	0	0	0	0	0	0	0	0	0	140	80	135	83	0	0	0	0	0	0	1	1	0	0	0	1	0	0
47	1	2	0	0	0	0	0	0	1	0	0	0	0	0	0	0	0	0	0	0	0	0	0	0	0	0	0	0	0	0	0	125	78	122	78	0	0	0	0	0	0	0	0	2	0	0	1	0	0
63	1	0	3	2	2	0	0	0	0	0	0	0	0	0	0	0	0	0	0	0	0	0	0	0	0	0	0	0	0	0	0	124	75	120	76	0	0	0	0	0	0	4	1	0	0	0	1	0	0
63	0	0	0	0	2	2	0	1	0	0	0	0	0	0	0	0	0	0	0	0	0	0	0	0	0	0	0	0	0	0	0	144	85	141	87	0	0	0	0	0	0	1	1	0	0	0	1	0	0
68	1	0	0	0	2	2	0	1	0	0	0	0	0	0	0	0	0	0	0	0	0	0	0	0	0	0	0	0	0	0	0	144	84	139	86	0	0	0	0	0	0	1	1	0	0	0	1	0	0
41	1	0	0	0	2	2	0	1	0	0	0	0	0	0	0	0	0	0	0	0	0	0	0	0	0	0	0	0	0	0	0	137	85	138	88	0	0	0	0	0	0	0	0	1	1	0	1	0	0
37	1	0	0	0	2	0	0	0	0	0	0	0	0	0	0	0	0	0	0	0	0	0	0	0	0	0	0	0	0	0	0	133	83	134	88	0	0	0	0	0	0	4	1	0	0	0	1	0	0
74	0	2	2	4	2	2	0	7	0	0	0	0	0	0	0	0	0	0	0	0	0	1	0	0	0	0	0	0	0	0	0	156	89	147	90	0	0	0	0	0	0	1	1	0	0	0	0	0	0
37	1	2	0	0	0	2	0	4	0	0	0	0	0	0	0	0	0	0	0	0	0	1	0	0	0	0	0	0	0	0	0	137	86	138	89	0	0	0	0	0	0	4	0	0	0	1	1	0	0
44	1	0	0	0	2	0	0	0	0	0	0	0	0	0	0	0	0	0	0	0	0	0	0	0	0	0	0	0	0	0	0	123	78	121	78	0	0	0	0	0	1	0	0	4	0	0	1	0	0
42	1	0	0	0	2	2	0	2	0	0	0	0	0	0	0	0	0	0	0	0	0	0	0	0	0	0	0	0	0	0	0	137	85	138	87	0	0	0	0	0	0	1	0	0	0	0	1	0	0
49	1	0	0	0	2	0	0	0	0	0	0	0	0	0	0	0	0	0	0	0	0	0	0	0	0	0	0	0	0	0	0	130	81	131	83	0	0	0	0	0	0	0	0	3	0	0	1	0	0
49	1	1	3	2	1	2	0	2	0	0	0	0	0	0	0	0	0	0	0	0	0	0	0	0	0	0	0	0	0	0	0	135	82	135	85	0	0	0	0	0	0	1	1	0	0	0	1	0	0
42	1	0	3	2	1	0	0	0	0	0	0	0	0	0	0	0	0	0	0	0	0	0	0	0	0	0	0	0	0	0	0	131	82	133	87	0	0	0	0	0	0	4	1	0	0	0	0	0	0
56	1	0	0	0	2	0	0	0	0	0	0	0	0	0	0	0	0	0	0	0	0	0	0	0	0	0	0	0	0	0	0	129	79	126	79	0	0	0	0	0	0	0	0	3	0	0	1	0	0
52	1	1	3	2	1	0	0	0	0	0	0	0	0	0	0	0	0	1	0	0	0	0	0	0	0	0	0	0	0	0	0	124	77	123	78	0	0	0	0	0	0	0	0	1	0	0	1	0	0
50	1	1	2	2	1	2	0	7	0	0	0	0	0	0	0	0	0	0	0	0	0	0	0	0	0	0	0	0	0	0	0	149	89	149	91	0	0	0	0	0	0	0	1	1	0	0	0	0	0
38	1	0	0	0	0	0	0	0	0	0	0	0	0	0	0	0	0	0	0	0	0	0	0	0	0	0	0	0	0	0	0	114	75	120	77	0	0	0	0	0	0	0	1	2	0	0	1	0	0
56	1	0	6	2	2	3	0	6	0	0	0	0	0	0	0	0	0	0	0	0	0	0	0	0	0	0	0	0	0	0	0	144	85	143	86	0	0	0	0	0	0	0	0	0	2	0	1	0	0
56	1	0	3	2	2	0	0	0	0	0	0	0	0	0	0	0	0	0	0	0	0	0	0	0	0	0	0	0	0	0	0	119	74	119	76	0	0	0	0	0	0	4	3	2	0	0	1	0	0
63	1	0	5	2	2	3	0	1	0	0	0	0	0	0	0	0	0	0	0	0	0	0	0	0	0	0	1	0	0	0	0	134	80	131	82	0	0	0	0	0	0	4	1	0	0	0	1	0	0
50	1	0	4	2	1	2	0	2	0	0	0	0	0	0	0	0	0	0	1	0	0	0	0	0	0	0	0	0	0	0	0	133	81	132	84	0	0	0	0	0	0	4	2	0	0	0	1	0	0
44	1	0	0	0	0	2	0	7	0	0	0	0	0	0	0	0	0	0	0	0	0	0	0	0	0	0	0	0	0	0	0	144	88	146	90	0	0	0	0	0	0	0	0	2	0	1	1	0	0
43	1	0	0	0	2	2	0	4	0	0	0	0	0	0	0	0	0	0	0	0	0	0	0	0	0	0	0	0	0	0	0	135	84	138	86	0	0	0	0	0	0	0	0	3	0	0	1	0	0
54	0	0	0	0	2	2	0	7	0	0	0	0	0	0	0	0	0	0	0	0	0	0	0	0	0	0	0	0	0	0	0	149	88	145	89	0	0	0	0	0	0	2	1	0	0	0	0	0	0
60	0	0	0	0	2	2	0	5	0	0	0	0	0	0	0	0	0	0	0	0	0	0	0	0	0	0	1	0	0	0	0	156	91	152	94	0	0	0	0	0	0	1	1	0	0	0	0	0	0
64	0	0	0	0	0	0	1	1	0	0	0	0	0	0	0	0	0	0	0	0	0	0	0	0	0	0	0	0	0	1	0	143	84	138	85	0	0	0	0	0	0	3	0	0	0	0	1	0	0
71	1	0	0	0	2	0	0	0	0	0	0	0	0	0	0	0	0	0	0	0	0	0	0	0	0	0	0	0	0	0	0	133	78	128	78	0	0	0	0	0	0	0	0	3	0	0	1	0	0
53	1	1	6	2	2	2	0	4	0	0	0	0	0	0	0	0	0	0	0	0	0	0	0	0	0	0	0	0	0	0	0	137	82	135	83	0	0	0	0	0	0	0	0	2	0	0	1	0	0
51	1	0	0	0	0	2	0	1	0	0	0	0	0	0	0	0	0	0	0	0	0	0	0	0	0	0	1	0	0	0	0	126	79	129	81	0	0	0	0	0	0	0	0	0	1	0	1	0	0
61	1	3	5	3	1	1	0	4	0	0	0	0	0	0	0	0	0	0	0	0	0	0	0	0	0	0	0	1	0	0	0	134	79	128	79	0	0	0	0	0	0	0	0	2	1	0	0	0	0
59	0	0	0	0	0	2	0	6	0	0	0	0	0	0	0	0	0	0	0	0	0	0	0	0	0	0	0	0	0	0	1	150	88	147	91	0	0	0	0	0	0	4	2	0	0	0	1	0	0
64	0	0	4	2	1	3	0	7	1	1	0	0	0	0	0	0	0	0	0	0	0	0	0	1	0	0	0	0	0	0	0	148	86	143	85	0	0	0	1	0	0	0	0	1	0	0	1	0	0
61	0	0	4	2	1	2	0	4	0	1	0	0	0	0	0	0	0	0	0	0	0	0	0	0	0	0	0	0	0	0	0	145	85	144	88	0	0	0	0	0	0	2	0	0	0	0	1	0	0
60	1	0	4	2	2	2	0	1	0	1	0	0	0	0	0	0	0	0	0	0	0	0	0	0	0	0	0	0	0	0	0	143	85	142	89	0	0	0	0	0	0	1	1	0	0	0	1	0	0
65	0	1	6	2	2	2	0	5	0	0	0	0	0	0	0	0	0	0	0	0	0	0	0	0	0	0	0	0	0	0	0	147	85	139	86	0	0	0	0	0	0	4	0	0	0	0	1	0	0
73	0	0	0	0	0	2	0	1	1	0	0	0	0	0	0	0	0	0	0	0	0	0	0	0	0	0	0	1	0	0	0	135	78	127	77	0	0	0	0	0	0	0	0	1	0	0	0	0	0
65	0	0	3	2	1	2	0	7	0	0	0	0	0	0	0	0	0	0	0	0	0	0	0	1	0	0	0	0	0	0	0	151	87	144	88	0	0	0	0	0	0	4	1	4	0	0	1	0	0
49	1	0	0	0	0	2	0	2	0	0	0	0	0	0	0	0	0	0	0	0	0	0	0	0	0	0	0	0	0	0	0	133	83	133	84	0	0	0	0	0	0	0	0	3	0	0	1	0	0
67	1	1	2	2	1	2	0	7	0	0	0	0	0	0	0	0	0	0	0	0	0	0	0	0	0	0	0	0	0	0	0	149	86	144	88	0	0	0	0	0	0	4	1	0	0	0	1	0	0
52	1	0	0	0	0	0	0	0	0	0	0	0	0	0	0	0	0	0	0	0	0	0	0	0	0	0	0	0	0	0	0	126	79	126	80	0	0	0	0	0	0	4	1	0	0	0	1	0	0
63	1	0	4	2	1	2	0	6	0	0	0	0	0	0	0	0	0	0	0	0	0	0	0	1	0	0	0	0	0	0	0	150	87	144	88	0	0	0	0	0	0	1	1	0	1	0	1	0	0
57	1	3	5	2	2	2	0	5	0	0	0	0	0	0	0	0	0	0	0	0	0	0	0	0	0	0	0	0	0	0	0	147	86	141	87	0	0	0	0	0	0	1	0	0	0	0	0	0	0
76	0	0	1	2	1	2	0	3	0	0	0	0	0	0	0	0	0	0	0	0	0	0	0	0	0	0	0	0	0	0	0	136	79	129	79	0	0	0	0	0	0	4	1	0	0	0	1	0	0
61	1	2	6	2	2	2	0	6	0	0	0	0	0	0	0	0	0	0	0	0	0	0	0	0	0	0	0	0	0	0	0	137	82	137	82	0	0	0	0	0	0	0	1	1	0	0	1	0	0
61	1	1	6	2	1	2	0	6	0	0	0	0	0	0	0	0	0	0	0	0	0	0	0	0	0	0	0	0	0	0	0	147	86	144	87	0	0	0	0	0	0	1	0	0	0	0	1	0	0
73	1	0	6	2	1	2	0	7	0	0	0	0	0	0	0	0	0	0	1	0	0	0	0	1	0	0	1	0	0	0	0	149	85	144	86	0	0	1	0	0	0	0	0	4	0	0	0	1	0
50	1	0	3	2	1	0	0	0	0	0	0	0	0	0	0	0	0	0	0	0	0	0	0	0	0	0	0	1	0	0	0	119	75	120	76	0	0	1	0	0	0	0	0	2	0	0	0	1	0
64	1	0	4	2	2	0	0	0	0	0	0	0	0	0	0	0	0	0	0	0	0	0	0	0	0	0	0	0	0	0	0	126	76	128	78	0	0	0	0	0	0	0	1	1	0	0	1	0	0
57	1	0	6	2	1	0	0	0	0	0	0	0	0	0	0	0	0	0	0	0	0	0	0	0	0	0	0	0	0	0	0	111	70	113	73	0	0	0	0	0	0	4	3	1	2	0	0	0	0
72	1	3	6	2	1	3	0	6	0	0	0	0	0	0	0	0	0	0	0	0	0	0	0	0	0	0	0	0	0	0	0	145	84	142	86	0	0	0	0	0	0	1	1	0	0	1	1	0	0
58	1	0	0	0	2	0	0	0	0	0	0	0	0	0	0	0	0	0	0	0	0	0	0	0	0	0	0	0	0	0	0	135	81	131	82	0	0	0	0	0	0	0	0	2	0	0	1	0	0
78	1	1	2	2	1	3	0	7	0	0	0	0	0	0	0	0	0	0	0	0	0	0	0	0	0	0	1	0	0	0	0	156	88	146	88	1	0	0	0	0	0	2	1	1	0	0	1	0	0
58	1	2	6	2	2	0	0	0	0	0	0	0	0	0	0	0	0	0	0	0	0	0	0	0	0	0	0	0	0	0	0	122	75	119	75	0	0	0	0	0	0	1	0	2	0	0	1	0	0
49	0	0	0	0	0	0	1	5	0	0	0	0	0	0	0	0	0	0	0	0	0	0	0	0	0	0	0	0	0	0	0	130	81	132	83	0	0	0	0	0	0	4	4	0	0	0	1	0	0
59	1	0	3	2	0	0	0	0	0	0	0	0	0	0	0	0	0	0	0	0	0	0	0	0	0	0	0	0	0	0	0	100	70	110	60	0	0	0	0	0	0	0	0	2	1	0	1	0	0
55	1	0	0	0	0	0	0	0	0	0	0	0	0	0	0	0	0	0	0	0	0	0	0	0	0	0	0	0	0	0	0	120	80	150	90	0	0	0	0	0	0	0	0	2	2	0	0	0	0
63	0	0	5	2	2	2	0	1	0	0	0	0	0	0	0	0	0	0	0	0	0	0	0	0	0	0	0	0	0	0	0	160	90	140	100	0	0	0	0	0	0	0	0	2	1	0	1	0	0
73	0	0	4	2	1	2	0	7	0	0	0	0	0	0	0	0	0	0	0	0	0	0	0	0	0	0	0	0	0	0	0	150	90	100	60	0	0	0	0	0	0	4	1	0	0	0	0	0	0
45	1	0	3	2	1	2	0	4	0	0	0	0	0	0	0	0	0	0	0	0	0	0	0	0	0	0	0	0	0	0	0	120	80	120	80	0	0	0	0	0	0	0	0	2	0	0	1	0	0
48	1	0	4	2	1	0	0	0	0	0	0	0	0	0	0	0	0	0	0	0	0	0	0	0	0	0	0	0	0	0	0	90	60	110	70	0	0	0	0	0	0	0	1	1	0	0	0	0	0
55	1	0	6	2	2	0	0	0	0	0	0	0	0	0	0	0	0	0	0	0	0	0	0	0	0	0	0	0	0	0	0	132	79	135	80	0	0	0	0	0	0	1	2	0	0	0	1	0	0
65	0	1	0	0	2	0	0	0	0	0	0	0	0	0	0	0	0	0	0	0	0	0	0	0	0	0	1	0	0	0	0	160	90	140	70	0	0	0	0	0	0	0	1	1	0	0	1	0	0
64	0	0	6	2	1	2	0	7	1	1	0	0	0	0	0	0	0	0	0	0	0	0	0	1	0	0	0	0	0	0	0	153	82	160	70	0	0	0	0	0	0	1	1	2	0	0	1	0	0
61	0	0	0	0	2	0	0	0	0	0	0	0	0	0	0	0	0	0	0	0	0	0	0	0	0	0	1	0	0	0	0	110	68	95	60	0	0	0	0	0	0	0	0	0	2	0	1	0	0
71	1	1	5	2	2	3	0	7	0	0	0	0	0	0	0	0	0	0	0	0	0	0	0	0	0	0	0	0	0	0	0	131	78	120	80	0	0	0	0	0	0	0	0	2	0	0	1	0	0
45	1	2	0	0	2	2	0	7	0	0	0	0	0	0	0	0	0	0	0	0	0	0	0	0	0	0	0	0	0	0	0	160	120	140	90	0	0	0	0	0	0	1	1	0	0	0	1	0	0
62	1	0	5	2	1	3	0	7	2	0	0	0	0	0	0	0	0	0	0	0	0	0	0	0	1	0	0	0	0	0	0	166	94	180	100	0	0	1	0	0	0	0	0	2	0	0	0	1	0
70	0	0	0	0	0	2	0	7	0	0	0	0	0	0	0	0	0	0	0	0	0	0	0	0	0	0	0	0	0	0	0	160	90	200	90	0	0	0	0	0	0	1	1	1	1	0	1	0	0
54	1	0	0	0	2	0	0	0	0	0	0	0	0	0	0	0	0	0	0	0	0	0	0	0	0	0	0	0	0	0	0	136	84	140	90	0	0	0	0	0	0	4	3	0	0	0	1	0	0
53	1	0	1	2	2	2	0	7	0	0	0	0	0	0	0	0	0	0	0	0	0	0	0	0	0	0	0	0	0	0	0	130	80	180	100	0	0	0	0	0	0	2	0	0	0	0	1	0	0
66	1	1	4	2	2	3	0	6	0	0	0	0	0	0	0	0	0	0	0	0	0	0	0	0	0	0	0	0	0	0	0	140	90	130	80	1	0	0	0	0	0	0	0	4	0	0	0	0	1
76	0	0	3	2	2	2	0	5	0	0	0	0	0	0	0	0	0	0	0	0	0	0	0	0	0	0	0	0	0	0	0	158	86	160	80	0	0	0	0	0	0	1	0	0	0	0	1	0	0
72	1	0	4	2	1	2	0	5	0	0	0	0	0	0	0	0	0	0	0	0	0	0	0	0	0	0	0	0	0	0	0	130	80	130	80	0	0	0	0	0	0	1	0	0	0	0	1	0	0
69	0	0	5	2	1	2	0	5	0	0	0	0	0	0	0	0	0	0	0	0	0	0	0	0	0	0	0	0	0	0	1	144	79	140	70	0	0	0	0	0	0	4	0	0	0	0	1	0	0
50	1	0	4	2	1	2	0	2	0	0	0	1	0	0	0	0	0	0	0	0	0	0	0	0	0	0	0	0	0	0	0	123	78	120	80	0	0	0	0	0	0	4	0	0	0	0	1	0	0
40	1	1	0	0	2	2	0	4	0	0	0	0	0	0	0	0	0	0	0	0	0	0	0	0	0	0	0	0	0	0	0	134	88	130	100	0	0	0	0	0	1	0	1	1	1	0	0	0	0
88	0	0	4	2	1	2	0	7	0	0	0	0	0	0	0	0	0	0	0	0	0	0	0	0	0	0	0	1	0	0	0	182	106	180	130	0	0	0	0	0	0	1	1	0	0	0	1	0	0
51	1	0	2	2	1	2	0	7	0	0	0	0	0	0	0	0	0	0	0	0	0	0	0	0	0	0	0	0	0	0	0	135	82	120	80	0	0	0	0	0	0	1	1	1	0	0	1	0	0
76	0	1	0	0	0	2	0	7	0	0	0	0	0	0	0	0	0	0	0	0	0	0	0	1	0	0	0	0	0	0	0	140	0	160	90	0	0	0	0	0	0	1	1	0	0	0	1	0	0
38	1	0	0	0	0	2	0	4	0	0	0	0	0	0	0	0	0	0	0	0	0	0	0	0	0	0	0	0	0	0	0	154	94	160	100	0	0	0	0	0	0	0	0	3	0	0	1	0	0
53	1	0	0	0	2	2	0	4	0	0	0	0	0	0	0	0	0	0	0	0	0	0	0	0	0	0	0	0	0	0	0	128	80	110	80	0	0	0	0	0	0	4	1	0	0	0	1	0	0
80	1	0	1	2	2	2	0	6	1	0	0	0	0	0	0	0	0	0	0	0	0	0	0	0	0	0	0	0	0	0	0	167	94	160	100	0	0	0	0	0	0	1	1	0	0	0	1	0	0
65	1	0	0	0	0	0	0	0	0	0	0	0	0	0	0	0	0	0	0	0	0	0	0	0	0	0	0	0	0	0	0	60	40	67	45	0	0	0	0	0	0	0	0	1	1	0	1	0	0
64	1	3	0	0	2	3	0	5	0	0	0	0	0	0	0	0	0	0	0	0	0	0	0	0	0	0	0	0	0	0	0	171	97	190	100	0	0	0	0	0	0	4	1	0	0	0	0	0	0
80	1	0	0	0	2	0	0	0	0	0	0	0	0	0	0	0	0	0	0	0	0	0	0	0	0	0	0	0	0	0	0	140	80	130	80	0	0	0	0	0	0	4	3	0	0	0	1	0	0
44	1	0	0	0	2	2	0	5	0	0	0	0	0	0	0	0	0	0	0	0	0	0	0	0	0	0	0	0	0	0	0	142	87	140	90	0	0	0	0	0	0	4	4	0	0	0	1	0	0
32	1	1	2	2	2	2	0	4	0	0	0	0	0	0	0	0	0	0	0	0	0	0	0	0	0	0	0	0	0	0	0	117	78	120	80	0	0	0	0	0	0	0	0	2	0	0	1	0	0
65	1	1	2	2	1	2	0	4	0	0	0	0	0	0	0	0	0	0	0	0	0	0	0	0	0	0	0	0	0	0	0	129	79	120	80	0	0	0	0	0	0	4	1	0	0	0	1	0	0
71	0	0	3	2	1	0	0	1	0	0	0	0	0	0	0	0	0	0	0	0	0	0	0	0	0	0	0	0	0	0	0	160	90	160	90	0	0	0	0	0	0	4	1	0	0	0	0	0	0
61	0	0	3	2	1	2	0	5	0	0	0	0	0	0	0	0	0	0	0	0	0	0	0	0	0	0	1	0	0	0	0	180	100	171	101	0	0	0	0	0	0	0	0	1	1	0	0	0	0
62	1	0	0	0	0	0	0	0	0	0	0	0	0	0	0	0	0	0	0	0	0	0	0	0	0	0	0	0	0	0	0	136	81	130	80	0	0	0	0	0	0	4	1	0	0	0	1	0	0
65	0	1	4	2	2	2	0	3	0	0	0	0	0	0	0	0	0	0	0	0	0	0	0	0	0	0	0	0	0	0	0	137	82	132	82	0	0	0	0	0	0	0	0	4	3	0	1	0	0
68	0	0	5	2	2	2	0	5	0	0	0	0	0	0	0	0	0	0	0	0	0	0	0	0	0	0	0	0	0	0	0	141	81	130	80	0	0	0	0	0	0	0	0	1	0	0	0	0	0
66	0	0	3	2	2	2	0	5	0	0	0	0	1	0	0	0	0	0	0	0	0	0	0	0	0	0	0	0	0	0	0	143	85	130	90	0	0	1	0	0	0	0	1	1	4	0	0	1	0
86	1	0	0	0	2	2	0	1	0	0	0	0	0	0	0	0	0	0	0	0	0	0	0	0	0	0	0	0	0	0	0	135	76	120	70	0	0	0	0	0	0	4	1	0	0	0	1	0	0
70	1	0	2	2	1	0	0	0	0	0	0	0	0	0	0	0	0	0	0	0	0	0	0	0	0	0	0	1	0	0	0	160	90	140	80	0	0	0	0	0	0	4	1	0	0	0	1	0	0
62	1	2	4	2	2	3	0	6	0	0	0	0	0	0	0	0	0	0	0	0	0	0	0	0	0	0	0	0	0	0	0	159	90	170	90	0	0	0	0	0	0	0	0	4	0	0	1	0	0
50	1	0	0	0	0	2	0	4	0	0	0	0	0	0	0	0	0	0	0	0	0	0	0	0	0	0	0	0	0	0	0	141	86	142	88	0	0	0	0	0	0	1	1	0	0	0	1	0	0
88	0	0	6	2	1	0	0	0	0	0	0	0	0	0	0	0	0	0	0	0	0	0	0	0	0	0	0	0	0	0	0	141	79	130	80	0	0	0	0	0	0	0	1	0	0	0	1	0	0
55	1	0	0	0	0	3	0	7	0	0	0	0	1	0	0	0	0	0	0	0	0	0	0	0	0	0	1	0	0	0	0	182	109	200	130	0	0	1	0	0	0	0	0	2	0	0	0	1	0
79	0	0	0	0	2	2	0	1	0	0	0	0	0	0	0	0	0	0	0	0	0	0	0	0	0	0	0	0	0	0	0	140	60	140	90	0	0	0	0	0	0	1	1	0	1	0	0	0	0
64	1	0	0	0	0	0	0	0	0	0	0	0	0	0	0	0	0	0	0	0	0	0	0	0	0	0	1	0	0	0	0	130	78	120	80	0	0	0	0	0	0	0	0	4	0	0	1	0	0
75	0	0	6	1	2	2	0	7	0	0	0	0	0	0	0	0	0	0	0	0	0	0	0	0	0	0	0	0	0	0	0	200	100	180	110	0	0	0	0	0	0	1	1	0	0	0	1	0	0
64	1	0	0	0	2	3	0	7	0	0	0	0	0	0	0	0	0	0	0	0	0	0	0	0	0	0	0	0	0	0	0	80	50	120	80	0	0	0	0	0	0	4	1	0	0	0	1	0	0
65	1	0	0	0	2	0	0	0	0	0	0	0	0	0	0	0	0	0	0	0	0	0	0	0	0	0	0	0	0	0	0	140	80	140	80	0	0	0	0	0	0	0	0	2	0	0	1	0	0
58	1	0	0	0	2	2	0	2	0	0	0	0	0	0	0	0	0	0	0	0	0	0	0	0	0	0	0	0	0	0	0	141	83	140	80	0	0	0	0	0	0	1	1	0	0	0	1	0	0
62	1	3	6	3	2	0	0	0	0	1	0	0	0	0	0	0	0	0	0	0	0	0	0	1	0	0	0	0	0	0	0	120	80	120	80	0	0	1	0	0	0	4	1	0	0	1	0	1	0
68	0	0	0	0	0	0	0	0	0	0	0	0	0	0	0	0	0	0	0	0	0	0	0	0	0	0	0	0	0	0	0	132	78	127	79	0	0	0	0	0	0	4	3	0	0	0	1	0	0
51	1	0	6	2	1	0	0	0	0	0	0	0	0	0	0	0	0	0	0	0	0	0	0	0	0	0	0	0	0	0	0	130	80	150	90	0	0	0	0	0	0	4	0	0	0	0	1	0	0
38	1	0	0	0	0	2	0	1	0	0	0	0	0	0	0	0	0	0	0	0	0	0	0	0	0	0	0	0	0	0	0	130	90	130	100	0	0	0	0	0	0	4	1	0	0	0	0	0	0
55	1	0	0	0	0	0	0	0	0	0	0	0	0	0	0	0	0	0	0	0	0	0	0	0	0	0	0	0	0	0	0	119	76	120	80	0	0	0	0	0	0	4	3	0	0	0	1	0	0
69	0	0	0	0	2	3	0	3	1	0	0	0	0	0	0	0	0	0	0	0	0	0	0	1	0	0	0	0	0	0	0	138	82	130	80	1	0	0	0	0	0	4	3	0	0	0	0	0	0
57	1	0	0	0	0	0	0	0	0	0	0	0	0	0	0	0	0	0	0	0	0	0	0	0	0	0	0	0	0	0	0	115	73	110	70	0	0	0	0	0	0	0	1	4	4	0	1	0	0
51	1	0	0	0	0	0	0	0	0	0	0	0	0	0	0	0	0	0	0	0	0	0	0	0	0	0	0	0	0	0	0	100	60	130	80	0	0	0	0	0	0	1	0	0	0	1	1	0	0
63	1	0	0	0	0	2	0	6	0	0	0	0	0	0	0	0	0	0	0	0	0	0	0	0	0	0	0	0	0	0	0	180	100	150	85	1	0	0	0	0	0	0	1	3	0	0	1	0	0
71	1	0	0	0	2	2	0	4	1	0	0	0	0	1	0	0	0	0	0	0	0	0	0	0	0	0	0	1	0	0	0	135	80	130	80	0	0	1	0	0	0	0	1	3	0	0	0	1	0
45	0	0	1	2	1	2	0	5	1	0	0	0	0	0	0	0	0	0	0	0	0	0	0	0	0	0	0	0	0	0	0	144	90	140	100	0	0	0	0	0	0	4	1	0	0	0	1	0	0
50	1	0	0	0	2	0	0	0	0	0	0	0	0	0	0	0	0	0	0	0	0	0	0	0	0	0	0	0	0	0	0	127	79	130	80	0	0	0	0	0	0	0	0	1	0	0	1	0	0
53	1	0	0	0	0	0	1	6	1	0	0	0	0	0	0	0	0	0	0	0	0	0	0	0	0	0	0	1	0	0	0	132	86	120	100	0	0	0	0	0	0	4	3	0	0	0	1	0	0
43	1	0	0	0	0	0	0	0	0	0	0	0	0	0	0	0	0	0	0	0	0	0	0	0	0	0	0	0	0	0	0	120	74	130	70	0	0	0	0	0	0	4	4	0	0	0	1	0	0
42	1	1	0	0	2	0	0	0	1	0	0	0	0	0	0	0	0	0	0	0	0	0	0	0	0	0	0	0	0	0	0	101	67	90	60	0	0	0	0	0	0	4	2	0	0	0	0	0	0
76	1	0	3	2	2	3	0	7	1	0	0	0	1	0	0	0	0	0	0	0	0	0	0	0	0	0	0	0	0	0	0	166	94	170	100	0	0	0	0	0	0	1	1	2	0	0	0	0	0
76	0	0	1	2	2	2	0	7	1	0	0	0	0	0	0	0	0	0	0	0	0	0	0	0	0	0	0	0	0	0	0	149	86	140	90	0	0	0	0	0	0	4	1	0	0	0	0	0	0
65	1	0	5	2	2	2	0	7	1	0	0	0	0	0	0	0	0	0	0	0	0	0	0	0	0	0	1	0	0	0	0	145	84	143	85	0	0	0	0	0	0	1	1	0	0	0	1	0	0
61	0	1	5	2	1	2	0	5	0	0	0	0	0	0	0	0	0	0	0	0	0	0	0	0	0	0	0	0	0	0	0	145	83	140	80	0	0	0	0	0	0	1	0	0	0	0	0	0	0
63	1	2	5	2	2	2	0	1	1	0	0	0	0	0	0	0	0	0	0	0	0	0	0	1	0	0	0	0	0	0	0	180	100	160	80	0	0	0	0	0	0	2	1	0	0	0	1	0	0
65	0	0	6	2	2	3	0	7	0	0	0	0	0	0	0	0	0	0	0	0	0	0	0	1	0	0	0	0	0	0	0	190	100	190	100	0	0	0	0	0	0	1	1	0	0	0	0	0	0
64	1	0	0	0	0	0	0	0	0	0	0	0	0	0	0	0	0	0	0	0	0	0	0	0	0	0	0	0	0	0	0	140	80	120	80	0	0	0	0	0	0	0	0	0	3	0	1	0	0
52	1	1	0	0	0	2	0	1	0	0	0	0	0	0	0	0	0	0	0	0	0	0	0	0	0	0	0	0	0	0	0	150	80	140	70	0	0	0	0	0	0	0	0	4	0	0	1	0	0
63	1	0	2	2	2	2	0	1	1	0	0	0	0	0	0	0	0	0	0	0	0	0	0	1	0	0	0	0	0	0	0	134	79	125	80	0	0	0	0	0	0	2	0	0	0	0	1	0	0
50	1	1	3	2	2	2	0	1	0	0	0	0	0	0	0	0	0	0	0	0	0	0	0	0	0	0	0	0	0	0	0	138	83	137	87	0	0	0	0	0	0	1	1	0	0	0	0	0	0
68	0	0	4	2	2	2	0	3	0	0	0	0	0	0	0	0	0	0	0	0	0	0	0	0	0	0	1	0	0	0	0	141	82	138	84	1	0	0	0	0	0	0	1	2	0	0	1	0	0
76	0	1	6	2	2	2	0	7	0	0	0	0	0	0	0	0	0	0	0	0	0	0	0	0	0	0	0	0	0	0	0	260	120	150	90	0	0	0	0	0	0	1	1	0	0	0	0	0	0
62	0	0	0	0	0	2	0	3	0	0	0	0	0	0	0	0	0	0	0	0	0	0	0	0	0	0	0	0	0	0	0	190	100	190	100	0	0	0	0	0	0	1	1	0	0	0	1	0	0
51	1	0	0	0	0	1	0	3	0	0	0	0	0	0	0	0	0	0	0	0	0	0	0	0	0	0	0	0	0	0	0	160	100	130	80	0	0	0	0	0	0	0	0	3	0	0	1	0	0
35	1	0	0	0	2	0	0	0	0	0	0	0	0	0	0	0	0	0	0	0	0	0	0	1	0	0	0	0	0	0	0	130	80	110	70	0	0	0	0	0	0	4	4	0	0	0	1	0	0
65	0	0	6	2	2	3	0	7	1	0	0	0	0	0	0	0	0	0	0	0	0	0	0	0	0	0	0	0	0	0	0	101	63	70	50	0	0	0	0	0	0	0	1	4	1	0	1	0	0
67	1	0	0	0	0	2	0	5	1	0	0	0	0	0	0	0	0	0	0	0	0	0	0	0	0	0	0	0	0	0	0	176	101	190	110	0	0	0	0	0	0	0	1	4	3	0	1	0	0
63	0	0	6	2	2	2	0	6	0	0	0	0	0	0	0	0	0	0	0	0	0	0	0	0	0	0	0	0	0	0	0	158	92	160	100	0	0	0	0	0	0	4	4	0	0	0	1	0	0
44	0	0	0	0	0	0	0	0	1	0	0	0	0	0	0	0	0	0	0	0	0	0	0	1	0	0	0	0	0	0	0	101	66	90	60	0	0	0	0	0	0	0	0	4	0	0	1	0	0
53	1	1	0	0	0	2	0	1	1	0	0	0	0	0	0	0	0	0	0	0	0	0	0	0	0	0	0	0	0	0	0	176	103	190	120	0	0	0	0	0	0	0	0	2	0	0	1	0	0
62	1	0	0	0	0	2	0	7	1	0	0	0	0	0	0	0	0	0	0	0	0	0	0	0	0	0	0	0	0	0	0	210	110	190	100	0	0	0	0	0	0	4	1	3	0	0	1	0	0
57	0	1	1	2	2	2	0	6	0	0	0	0	0	0	0	0	0	0	0	0	0	0	0	0	0	0	0	0	0	0	0	135	82	120	80	0	0	0	0	0	0	0	0	3	0	0	1	0	0
66	0	0	0	0	1	2	0	7	0	0	0	0	0	0	0	0	0	0	0	0	0	0	0	1	0	0	0	0	0	0	0	190	100	200	100	0	0	0	0	0	0	1	1	0	0	0	1	0	0
51	1	1	0	0	2	0	0	0	0	0	0	0	0	0	0	0	0	0	0	0	0	0	0	0	0	0	0	0	0	0	0	110	70	110	70	0	0	0	0	0	0	0	1	1	0	0	1	0	0
53	1	0	0	0	1	2	0	5	0	0	0	0	0	0	0	0	0	0	0	0	0	0	0	0	0	0	0	0	0	0	0	160	90	110	60	0	0	0	0	0	0	0	0	1	0	0	0	0	0
63	0	0	0	0	2	2	0	7	0	0	0	0	0	0	0	0	0	0	0	0	0	0	0	0	0	0	1	0	0	0	0	142	84	130	80	0	0	0	0	0	0	1	0	0	0	0	1	0	0
50	1	0	1	2	2	2	0	2	0	0	0	0	0	0	0	0	0	0	0	0	0	0	0	0	0	0	0	0	0	0	0	134	82	138	87	0	0	0	0	0	0	0	0	1	0	0	1	0	0
52	0	0	0	0	2	1	0	1	0	0	0	0	0	0	0	0	0	0	0	0	0	0	0	0	0	0	0	0	1	0	0	125	76	110	70	0	0	0	0	0	0	1	1	0	0	0	1	0	0
58	1	0	2	2	1	2	0	7	0	0	0	0	0	0	0	0	0	0	0	0	0	0	0	0	0	0	0	0	0	0	0	160	90	180	120	0	0	0	0	0	0	4	3	0	0	0	1	0	0
77	0	1	2	2	2	2	0	5	0	0	0	0	0	0	0	0	0	0	0	0	0	0	0	0	0	0	0	0	0	0	0	159	89	150	90	0	0	0	0	0	0	1	1	0	0	0	0	0	0
50	1	0	1	1	1	2	0	3	0	0	0	0	0	0	0	0	0	0	0	0	0	0	0	0	0	0	0	0	0	0	0	110	70	112	74	0	0	0	0	0	0	4	1	0	0	0	1	0	0
68	0	1	4	2	2	3	0	3	0	0	0	0	0	0	0	0	0	0	0	0	0	0	0	0	0	0	0	0	0	0	0	170	90	190	100	0	0	0	0	0	0	0	0	2	0	0	1	0	0
73	1	1	4	2	2	2	0	4	0	0	0	0	0	0	0	0	0	0	0	0	0	0	0	0	0	0	0	0	0	0	0	140	90	110	70	0	0	0	0	0	0	0	0	2	0	0	0	0	0
60	1	0	6	2	2	0	0	0	0	0	0	0	0	0	0	0	0	0	0	0	0	0	0	0	0	0	0	0	0	0	0	125	70	125	75	0	0	0	0	0	0	0	0	1	0	0	1	0	0
64	0	1	1	2	2	2	0	6	0	0	0	0	0	0	0	0	0	0	0	0	0	0	0	1	0	0	0	0	0	0	0	130	80	140	80	0	0	0	0	0	0	1	1	0	0	0	1	0	0
65	1	0	0	0	0	2	0	6	0	0	0	0	0	0	0	0	0	0	0	0	0	0	0	0	0	0	0	0	0	0	0	130	90	120	70	0	0	0	0	0	0	0	1	2	0	0	1	0	0
51	1	0	0	0	2	3	0	7	0	0	0	0	0	0	0	0	0	0	0	0	0	0	0	0	0	0	0	0	0	0	0	120	80	130	84	0	0	0	0	0	0	4	2	0	0	0	1	0	0
59	1	0	0	0	0	2	0	1	0	0	0	0	0	0	0	0	0	0	0	0	0	0	0	0	0	0	0	0	0	0	0	150	100	140	100	0	0	0	0	0	0	0	1	2	0	0	1	0	0
42	1	0	0	0	2	0	0	0	0	0	0	0	0	0	0	0	0	0	0	0	0	0	0	0	0	0	0	0	0	0	0	140	90	120	70	0	0	0	0	0	0	0	0	3	0	0	0	0	0
45	1	0	0	0	0	2	0	6	0	0	0	0	0	0	0	0	0	0	0	0	0	0	0	0	0	0	0	0	0	0	0	120	80	140	90	0	0	0	0	0	0	0	1	1	0	0	1	0	0
56	1	0	0	0	0	0	0	0	0	0	0	0	0	0	0	0	0	0	0	0	0	0	0	0	0	0	0	0	0	0	0	135	81	133	84	0	0	0	0	0	0	0	0	2	0	0	1	0	0
73	0	1	0	0	2	2	0	5	1	0	0	0	0	0	0	0	0	0	0	0	0	0	0	0	1	0	0	0	0	0	0	142	82	135	81	0	0	0	0	0	0	0	0	4	0	0	0	0	0
62	0	0	0	0	0	0	0	0	1	0	0	0	1	0	0	0	0	0	0	0	0	0	0	0	0	0	0	0	0	0	0	129	79	126	79	0	0	0	0	0	0	4	3	0	0	0	1	0	0
65	0	1	2	2	2	0	0	0	1	0	0	0	0	0	0	0	0	0	0	0	0	0	0	0	0	0	1	0	0	0	0	134	80	131	81	0	0	0	0	0	0	0	0	1	0	0	1	0	0
78	1	0	6	2	2	2	0	7	0	0	0	0	0	1	0	0	0	0	0	0	0	0	0	1	0	0	0	0	0	0	0	148	83	141	82	0	0	1	0	0	0	0	0	1	0	0	0	1	0
76	0	0	0	0	2	2	0	5	1	0	0	0	0	0	0	0	0	0	0	0	0	0	0	0	0	0	0	0	0	0	0	151	86	141	85	0	0	0	0	0	0	0	0	0	1	0	1	0	0
49	0	0	0	0	2	2	0	7	0	0	0	0	0	0	0	0	0	0	0	0	0	0	0	1	0	0	0	0	0	0	0	150	89	147	92	0	0	0	0	0	0	4	2	0	0	0	0	0	0
57	1	0	0	0	2	2	0	2	0	0	0	0	0	0	0	0	0	0	0	0	0	0	0	0	0	0	0	0	0	0	0	132	81	131	83	0	0	0	0	0	0	4	1	0	0	0	1	0	0
51	1	0	0	0	0	2	0	5	0	0	0	0	0	0	0	0	0	0	0	0	0	0	0	0	0	0	0	0	0	0	0	132	82	134	83	0	0	0	0	0	0	4	1	0	0	0	1	0	0
61	1	0	0	0	0	0	0	0	1	0	0	0	0	0	0	0	0	0	0	0	0	0	0	0	0	0	0	0	0	0	1	127	78	125	77	0	0	0	0	0	0	0	0	2	0	0	0	0	0
53	1	0	0	0	2	2	0	6	0	0	0	0	0	0	0	0	0	0	0	0	0	0	0	0	0	0	0	0	0	0	0	162	95	170	100	0	0	0	0	0	0	1	1	1	0	0	1	0	0
47	1	1	6	1	2	3	0	7	0	0	0	0	0	0	0	0	0	0	0	0	0	0	0	0	0	0	0	0	0	0	0	150	89	152	94	0	0	0	0	0	0	0	0	1	0	0	0	0	0
63	0	0	0	0	2	2	0	3	0	0	0	0	0	0	0	0	0	0	0	0	1	0	0	0	0	0	0	0	0	0	0	139	83	136	82	0	0	0	0	0	0	0	0	1	0	0	1	0	0
59	1	2	0	0	2	2	0	5	0	0	0	0	0	0	0	0	0	0	0	0	0	0	0	0	0	0	1	0	0	0	0	145	78	140	60	0	0	0	0	0	0	1	1	0	0	0	1	0	0
52	0	1	5	2	0	3	0	7	0	0	0	0	0	0	0	0	0	0	0	0	0	0	0	0	0	0	0	0	0	0	0	120	71	110	60	0	0	1	0	0	0	0	0	3	0	1	0	1	0
56	1	0	0	0	2	0	0	0	0	0	0	0	0	0	0	0	0	0	0	0	0	0	0	0	0	0	0	0	0	0	0	128	79	130	80	0	0	0	0	0	0	4	1	0	0	0	1	0	0
56	1	0	0	0	0	0	0	0	0	0	0	0	0	0	0	0	0	0	0	0	0	0	0	0	0	0	0	0	0	0	0	139	82	140	80	0	0	0	0	0	0	4	1	0	0	0	1	0	0
64	1	0	0	0	2	2	0	6	0	0	0	0	0	0	0	0	0	0	0	0	0	0	0	0	0	0	0	0	0	0	0	120	70	180	100	0	0	0	0	0	0	0	1	1	0	0	1	0	0
63	0	0	1	2	2	2	0	1	0	0	0	0	0	0	0	0	0	0	0	0	0	0	0	0	0	0	0	0	0	0	0	130	80	130	80	0	0	0	0	0	0	0	0	1	0	0	1	0	0
74	0	0	0	0	0	0	0	0	0	0	0	0	0	0	0	0	0	0	0	0	0	0	0	0	0	0	1	0	0	0	0	160	80	130	80	0	0	0	0	0	0	1	0	0	0	0	1	0	0
38	1	0	0	0	2	2	0	1	0	0	0	0	0	0	0	0	0	0	0	0	0	0	0	0	0	0	0	0	0	0	0	140	90	130	90	0	0	0	0	0	0	4	1	0	0	0	1	0	0
64	1	0	0	0	2	2	0	4	0	0	0	0	0	0	0	0	0	0	0	0	0	0	0	1	0	0	0	0	0	0	0	160	90	180	110	0	0	0	0	0	0	4	1	0	0	0	1	0	0
58	1	0	0	0	0	0	0	0	0	0	0	0	0	0	0	0	0	0	0	0	0	0	0	0	0	0	1	0	0	0	0	126	75	120	70	0	0	0	0	0	0	0	0	0	3	0	1	0	0
49	1	0	0	0	2	2	0	3	0	0	0	0	0	0	0	0	0	0	0	0	0	0	0	0	0	0	1	0	0	0	0	133	87	135	100	0	0	0	0	0	0	0	0	4	0	0	0	0	0
66	1	0	0	0	2	0	0	0	0	0	0	0	0	0	0	0	0	0	0	0	0	0	0	0	0	0	0	0	0	0	0	122	74	120	80	0	0	0	0	0	0	0	0	1	0	0	1	0	0
59	1	0	0	0	2	0	0	0	0	0	0	0	0	0	0	0	0	0	0	0	0	0	0	0	0	0	0	0	0	0	0	129	79	120	80	0	0	0	0	0	0	1	0	0	0	0	1	0	0
52	1	0	0	0	2	0	0	0	0	0	0	0	0	0	0	0	0	0	0	0	0	0	0	0	0	0	0	0	0	0	0	150	80	150	100	0	0	0	0	0	0	2	2	0	0	0	1	0	0
61	1	1	5	2	2	2	0	4	0	0	0	0	0	0	0	0	0	0	0	0	0	0	0	0	0	0	0	0	0	0	0	137	80	140	80	0	0	0	0	0	0	1	1	0	0	0	0	0	0
55	1	3	0	0	2	2	0	1	0	0	0	0	0	0	0	0	0	0	0	0	0	0	0	0	0	0	0	0	0	0	0	141	85	140	90	0	0	0	0	0	0	3	1	0	0	0	0	0	0
63	0	0	5	2	2	2	0	4	0	0	0	0	0	0	0	0	0	0	0	0	0	0	0	0	0	0	0	0	0	0	0	150	90	150	90	0	0	0	0	0	0	0	1	1	0	0	1	0	0
64	0	1	1	3	2	2	0	1	0	0	0	0	0	0	0	0	0	0	0	0	0	0	0	0	0	0	1	0	0	0	0	146	88	140	100	0	0	0	0	0	0	1	1	0	0	0	1	0	0
74	0	0	0	0	0	0	0	0	1	0	0	0	0	0	0	0	0	0	0	0	0	0	0	0	0	0	0	1	0	0	0	110	67	90	60	0	0	0	0	0	0	0	0	4	1	0	0	0	0
51	1	1	3	1	2	0	0	0	1	0	0	0	0	0	0	0	0	0	0	0	0	0	0	0	0	0	0	0	0	0	0	117	74	117	74	0	0	0	0	0	0	0	0	2	0	0	1	0	0
49	1	1	4	2	2	2	0	6	0	0	0	0	0	0	0	0	0	0	0	0	0	0	0	0	0	0	0	0	0	0	0	150	89	150	94	0	0	0	0	0	0	1	1	1	0	0	0	0	0
52	1	1	0	0	2	2	0	2	0	0	0	0	0	0	0	0	0	0	0	0	0	0	0	0	0	0	0	0	0	0	0	137	84	137	86	0	0	0	0	0	0	0	0	3	0	0	0	0	0
56	1	0	0	0	2	2	0	6	0	0	0	0	0	0	0	0	0	0	0	0	0	0	0	0	0	0	0	0	0	0	0	145	87	143	87	0	0	0	0	0	0	0	0	2	0	0	1	0	0
63	0	0	2	2	1	0	0	0	0	0	0	0	0	0	0	0	0	0	0	0	0	0	0	0	0	0	0	0	0	0	0	122	74	117	74	0	0	0	0	0	0	4	0	0	0	0	0	0	0
49	1	0	0	0	0	2	0	1	0	0	0	0	0	0	0	0	0	0	0	0	0	0	0	0	0	0	0	0	0	0	0	141	86	143	91	0	0	0	0	0	0	2	1	0	0	0	1	0	0
49	1	0	6	1	2	0	0	0	0	0	0	0	0	0	0	0	0	0	0	0	0	0	0	0	0	0	0	0	0	0	0	129	79	129	81	0	0	0	0	0	0	0	0	2	0	0	1	0	0
50	1	0	5	1	1	3	0	6	0	0	0	0	0	0	0	0	0	0	0	0	0	0	0	0	0	0	1	0	0	0	0	144	87	145	89	0	0	0	0	0	0	0	0	4	2	0	1	0	0
61	1	0	0	0	2	0	0	0	0	0	0	0	0	0	0	0	0	0	0	0	0	0	0	0	0	0	0	0	0	0	0	128	80	132	83	0	0	0	0	0	0	4	4	0	0	0	1	0	0
37	1	0	0	0	2	0	0	0	0	0	0	0	0	0	0	0	0	0	0	0	0	0	0	0	0	0	0	0	0	0	0	128	82	134	86	0	0	0	0	0	0	1	0	0	0	0	1	0	0
84	0	1	0	0	0	2	0	5	1	0	0	0	0	0	0	0	0	0	0	0	0	0	0	0	0	0	1	0	0	0	0	145	83	137	81	0	0	0	0	0	0	2	1	0	0	0	0	0	0
64	0	0	0	0	0	2	0	3	1	0	0	0	0	0	0	0	0	0	0	0	0	0	0	0	0	0	0	0	0	0	0	150	88	147	91	0	0	0	0	0	0	1	1	0	0	0	1	0	0
44	1	0	0	0	0	0	0	0	0	0	0	0	0	0	0	0	0	0	0	0	0	0	0	0	0	0	0	0	0	0	0	120	77	122	78	0	0	0	0	0	0	0	0	2	0	0	0	0	0
49	1	0	0	0	0	0	0	0	0	0	0	0	0	0	0	0	0	0	0	0	0	0	0	0	0	0	0	0	0	0	0	125	79	129	82	0	0	0	0	0	0	0	1	2	0	0	1	0	0
70	1	0	0	0	2	2	0	1	0	0	0	0	0	0	0	0	0	0	0	0	0	0	0	0	0	0	0	0	0	0	0	136	81	133	82	0	0	0	0	0	0	2	1	0	0	0	1	0	0
54	1	0	0	0	2	3	0	7	0	0	0	0	0	0	0	0	0	0	0	0	0	0	0	0	0	0	0	0	0	0	0	151	90	149	91	0	0	0	0	0	0	1	1	0	0	0	1	0	0
59	0	0	0	0	2	3	0	6	1	0	0	0	0	0	0	0	0	0	0	0	0	0	0	1	0	0	0	0	0	0	0	153	90	152	92	0	0	0	0	0	0	0	0	2	0	0	1	0	0
79	1	0	2	2	1	3	0	7	0	0	0	0	0	0	0	0	0	0	0	0	0	0	0	0	0	0	1	0	0	0	0	151	86	144	85	0	0	0	0	0	0	1	0	0	0	0	0	0	0
70	0	0	1	2	1	0	0	0	0	0	0	0	0	0	0	0	0	0	0	0	0	0	0	0	0	0	0	0	0	0	0	161	89	170	90	0	0	0	0	0	0	0	0	1	0	0	1	0	0
65	0	1	5	2	1	2	0	7	0	0	0	0	0	0	0	0	0	0	0	0	0	0	0	0	1	0	0	0	0	0	0	143	82	130	80	0	0	0	0	0	0	0	0	2	0	0	0	0	0
81	0	0	6	2	1	2	0	6	1	0	0	0	0	0	0	0	0	0	0	0	0	0	0	0	0	0	0	0	0	0	0	110	70	220	110	0	0	0	0	0	0	0	0	1	0	0	0	0	0
77	0	0	0	0	2	2	0	6	0	0	0	0	0	0	0	0	0	0	0	0	0	0	0	0	0	0	0	0	0	0	0	185	100	190	100	0	0	0	0	0	0	2	0	0	0	0	1	0	0
68	1	0	6	2	1	2	0	7	0	0	0	0	0	0	0	0	0	0	0	0	0	0	0	0	0	0	0	0	1	0	0	176	122	150	190	0	0	0	0	0	0	4	1	0	0	0	1	0	0
64	0	0	1	2	2	2	0	5	0	0	0	0	0	0	0	0	0	0	0	0	0	0	0	0	0	0	0	0	0	0	0	158	87	160	80	0	0	0	0	0	0	0	1	1	0	0	0	0	0
50	1	1	6	2	2	0	0	0	0	0	0	0	0	0	0	0	0	0	0	0	0	0	0	0	0	0	0	0	0	0	0	140	80	140	90	0	0	0	0	0	0	1	1	0	0	0	1	0	0
64	1	0	6	2	1	2	0	7	0	0	0	0	0	0	0	0	0	0	0	0	0	0	0	0	0	0	0	0	0	0	0	140	82	140	80	0	0	0	0	0	0	0	0	4	3	0	1	0	0
70	0	0	2	2	1	0	1	7	0	0	0	0	0	0	0	0	0	0	0	0	0	0	0	0	0	0	0	0	0	0	0	156	86	150	80	0	0	0	0	0	0	1	0	0	0	0	1	0	0
65	0	0	2	2	1	2	0	7	0	0	0	0	0	0	0	0	0	0	0	0	0	0	0	0	0	0	0	0	0	0	0	140	79	130	70	0	0	0	0	0	0	1	1	1	0	0	0	0	1
40	1	0	0	0	0	0	0	0	0	0	0	0	0	0	0	0	0	0	0	0	0	0	0	0	0	0	0	0	0	0	0	125	79	120	80	0	0	0	0	0	0	0	0	2	0	0	1	0	0
61	1	0	5	2	1	0	0	0	0	0	0	0	0	0	0	0	0	0	0	0	0	0	0	0	0	0	0	0	0	0	0	116	71	110	70	0	0	0	0	0	0	4	1	0	0	0	1	0	0
45	0	1	1	2	2	3	0	7	1	0	0	0	0	0	0	0	0	0	0	0	0	0	0	0	0	0	1	0	0	0	0	130	81	130	80	0	0	0	0	0	0	4	1	0	0	0	1	0	0
54	1	2	5	2	2	2	0	7	0	0	0	0	0	0	0	0	0	0	0	0	0	0	0	0	0	0	0	0	0	0	0	173	103	180	120	0	0	0	0	0	0	0	0	1	0	0	1	0	0
74	0	0	3	4	2	2	0	1	0	0	0	0	0	0	0	0	0	0	0	0	0	0	0	0	0	0	0	0	0	0	0	160	80	150	90	0	0	0	0	0	0	1	1	0	0	0	1	0	0
66	1	0	1	1	0	0	0	0	0	0	0	0	0	0	0	0	0	0	0	0	0	0	0	0	0	0	0	0	0	0	0	136	80	130	80	0	0	0	0	0	0	1	0	0	0	0	1	0	0
27	1	1	1	4	2	2	0	1	0	0	0	0	0	0	0	0	0	0	0	0	0	0	0	0	0	0	0	0	0	0	0	145	90	170	100	0	0	0	0	0	0	1	1	0	0	0	1	0	0
50	1	1	3	2	2	0	0	0	0	0	0	0	0	0	0	0	0	0	0	0	0	0	0	0	0	0	0	0	0	0	0	140	85	150	90	0	0	0	0	0	0	1	0	0	0	0	1	0	0
65	1	0	0	0	0	0	0	0	1	0	0	0	0	0	0	0	0	0	0	0	0	0	0	0	0	0	0	0	0	0	0	125	78	120	80	0	0	0	0	0	0	0	0	3	0	0	1	0	0
65	1	0	1	2	1	0	0	0	0	0	0	0	0	0	0	0	0	0	0	0	0	0	0	0	0	0	0	0	0	0	0	133	82	120	90	0	0	0	0	0	0	4	4	0	0	0	1	0	0
51	1	0	1	2	2	2	0	2	1	0	0	0	0	0	0	0	0	0	0	0	0	0	0	0	0	0	0	0	0	0	0	126	79	120	80	0	0	0	0	0	0	4	2	2	0	0	0	0	0
63	1	0	6	2	1	0	0	0	1	0	0	0	0	0	0	0	0	0	0	0	0	0	0	1	0	0	0	0	0	0	0	125	80	160	90	0	0	0	0	0	0	4	3	0	0	0	1	0	0
50	1	1	4	2	1	0	0	0	0	0	0	0	0	0	0	0	0	0	0	0	0	0	0	0	0	0	0	0	0	0	0	130	80	130	83	0	0	0	0	0	0	1	1	0	0	0	1	0	0
38	1	0	0	0	0	0	0	0	0	0	0	0	0	0	0	0	0	0	0	0	0	0	0	0	0	0	0	0	0	0	0	130	80	130	80	0	0	0	0	0	0	1	1	0	0	0	1	0	0
45	1	0	1	4	1	2	0	7	0	0	0	0	0	0	0	0	0	0	0	0	0	0	0	0	0	0	0	0	0	0	0	220	120	160	110	0	0	0	0	0	0	4	3	0	0	0	1	0	0
57	1	0	1	2	2	2	0	4	0	0	0	0	0	0	0	0	0	0	0	0	0	0	0	0	0	0	0	0	0	0	0	160	90	170	110	0	0	0	0	0	0	0	1	1	0	0	1	0	0
69	1	0	0	0	0	0	0	0	1	0	0	0	0	0	0	0	0	0	0	0	0	0	0	0	0	0	0	0	0	0	0	143	85	140	90	0	0	0	0	0	0	4	1	0	0	0	1	0	0
52	0	1	6	2	2	2	0	6	1	0	0	0	0	0	0	0	0	0	0	0	0	0	0	0	0	0	1	0	0	0	0	153	91	160	100	0	0	0	0	0	0	0	1	4	0	0	1	0	0
53	1	0	6	3	1	0	0	0	0	0	0	0	0	0	0	0	0	0	0	0	0	0	0	0	0	0	0	0	0	0	0	119	75	120	80	0	0	0	0	0	0	0	0	1	1	1	1	0	0
39	1	1	0	2	1	0	0	0	1	0	0	0	0	0	0	0	0	0	0	0	0	0	0	0	0	0	0	0	0	0	0	106	68	100	60	0	0	0	0	0	0	1	1	2	0	0	1	0	0
41	1	0	0	0	0	0	0	0	1	0	0	0	0	0	0	0	0	0	0	0	0	0	0	0	0	0	0	0	0	0	0	120	90	140	90	0	0	0	0	0	0	2	3	0	0	0	1	0	0
72	1	1	4	2	1	2	0	7	0	0	0	0	0	0	0	0	0	0	0	0	0	0	0	0	0	0	0	0	0	0	0	150	87	140	90	0	0	0	0	0	0	0	0	4	0	0	1	0	0
64	0	1	0	0	2	2	1	1	0	0	0	0	0	0	0	0	0	0	0	0	0	0	0	1	0	0	0	0	0	0	0	158	90	170	90	0	0	0	0	0	0	0	0	3	0	0	1	0	0
27	1	0	0	0	2	2	0	3	0	0	0	0	0	0	0	0	0	0	0	0	0	0	0	0	0	0	0	0	0	0	0	110	90	130	80	0	0	0	0	0	0	2	1	0	0	0	1	0	0
70	0	1	1	2	1	0	1	7	0	0	0	0	0	0	0	0	0	0	0	0	0	0	0	1	0	0	0	0	0	0	0	137	81	130	80	0	0	0	0	0	0	0	0	2	0	0	1	0	0
49	1	0	0	0	0	3	0	6	1	0	0	0	0	0	0	0	0	0	0	0	0	0	0	0	0	0	0	0	0	0	0	180	90	160	120	0	0	0	0	0	0	3	3	4	0	1	1	0	0
52	1	0	0	0	2	2	0	7	0	0	0	0	0	0	0	0	0	0	0	0	0	0	0	0	0	0	0	0	0	0	0	170	100	150	90	0	0	0	0	0	0	1	1	0	0	0	1	0	0
56	1	0	1	2	1	0	0	0	0	0	0	0	0	0	0	0	0	0	0	0	0	0	0	0	0	0	1	0	0	0	0	131	81	130	90	0	0	0	0	0	0	4	4	0	0	0	0	0	0
62	1	0	0	0	0	0	0	0	0	0	0	0	0	0	0	0	0	0	0	0	0	0	0	0	0	0	0	0	0	0	0	140	90	130	80	0	0	0	0	0	0	0	1	2	2	0	1	0	0
62	0	0	3	2	2	0	0	0	0	0	0	0	0	0	0	0	0	0	0	0	0	0	0	0	0	0	0	0	0	0	0	131	78	130	80	0	0	0	0	0	0	4	1	0	0	0	1	0	0
60	0	0	0	0	2	2	0	5	0	0	0	0	0	0	0	0	0	0	0	0	0	0	0	1	0	0	1	0	0	0	0	130	80	131	82	0	0	0	0	0	0	4	0	0	0	0	1	0	0
51	1	0	3	2	2	2	0	5	0	0	0	0	0	0	0	0	0	0	0	0	0	0	0	0	0	0	0	0	0	0	0	180	100	130	80	0	0	0	0	0	0	0	0	2	0	0	1	0	0
57	1	0	0	0	0	0	0	0	0	0	0	0	0	0	0	0	0	0	0	0	0	0	0	0	0	0	0	0	0	0	0	126	78	124	78	0	0	0	0	0	0	4	1	0	0	0	1	0	0
62	1	0	0	0	0	0	0	0	1	0	0	0	0	0	0	0	0	0	0	0	0	0	0	1	0	0	0	0	1	0	0	110	70	111	70	0	0	0	0	0	0	4	1	0	0	0	1	0	0
52	0	0	0	0	0	2	0	3	1	0	0	0	0	0	0	0	0	0	0	0	0	0	0	0	0	0	0	0	0	0	0	136	83	132	85	1	0	0	0	0	0	4	1	0	0	0	0	0	0
55	1	0	0	0	2	2	0	1	0	0	0	0	0	0	0	0	0	0	0	0	0	0	0	0	0	0	0	0	0	0	0	135	83	136	87	0	0	0	0	0	0	4	2	0	0	0	0	0	0
57	0	0	6	2	2	2	0	7	0	0	0	0	0	0	0	0	0	0	0	0	0	0	0	1	0	0	0	0	0	0	0	150	88	149	90	0	0	0	0	0	0	2	1	0	0	0	1	0	0
58	0	0	0	0	0	0	0	0	0	0	0	0	0	0	0	0	0	0	0	0	0	0	0	1	0	0	0	0	0	0	0	124	77	124	78	0	0	0	0	0	0	2	1	0	0	0	0	0	0
79	0	1	6	2	1	2	0	6	0	0	0	0	0	0	0	0	0	0	0	0	0	0	0	0	0	0	0	0	1	0	0	80	60	88	58	0	0	0	0	0	0	0	0	0	2	0	1	0	0
47	1	0	6	2	2	0	0	0	0	0	0	0	0	0	0	0	0	0	0	0	0	0	0	0	0	0	0	0	0	0	0	126	79	130	83	0	0	0	0	0	0	0	0	2	0	0	1	0	0
46	0	0	0	0	2	2	0	2	0	0	0	0	0	0	0	0	0	0	0	0	0	0	0	0	0	0	0	0	0	0	0	137	84	139	88	0	0	0	0	0	0	3	1	0	0	0	1	0	0
59	0	2	0	0	2	2	0	7	1	0	0	0	0	0	0	0	0	0	0	0	0	0	0	0	0	0	1	0	0	0	0	145	86	140	84	0	0	0	0	0	0	0	0	2	2	0	0	0	0
38	1	0	0	0	0	2	0	1	0	0	0	0	0	0	0	0	0	0	0	0	0	0	0	0	0	0	0	0	0	0	0	124	80	126	82	0	0	0	0	0	0	0	0	4	0	0	1	0	0
54	1	0	0	0	2	2	0	5	0	0	0	0	0	0	0	0	0	0	0	0	0	0	0	0	0	0	0	0	0	0	0	139	83	132	82	0	0	0	0	0	0	1	1	4	0	0	1	0	0
79	0	1	0	0	0	2	0	1	1	0	0	0	0	0	0	0	0	0	0	0	0	0	0	0	0	0	0	0	0	0	0	135	79	130	80	0	0	0	0	0	0	1	1	2	0	0	1	0	0
55	1	2	6	2	2	2	0	6	1	1	0	0	0	0	0	0	0	0	0	0	0	0	0	0	0	0	0	0	0	0	0	91	57	60	40	0	0	0	0	0	0	1	1	0	0	0	1	0	0
61	1	0	0	0	2	2	0	7	0	0	0	0	0	0	0	0	0	0	0	0	0	0	0	0	0	0	1	0	0	0	0	124	76	100	70	0	0	0	0	0	0	1	1	0	0	0	0	0	0
58	1	1	0	0	2	2	0	1	1	0	0	0	0	0	0	0	0	0	0	0	0	0	0	0	0	0	0	0	0	0	0	100	70	100	60	0	0	0	0	0	0	0	0	4	0	0	1	0	0
54	1	0	0	0	0	0	0	0	0	0	0	0	0	0	0	0	0	0	0	0	0	0	0	0	0	0	0	0	0	0	0	120	80	124	79	0	0	0	0	0	0	0	0	3	0	0	1	0	0
57	1	3	6	2	1	0	0	0	1	0	0	0	0	0	0	0	0	0	0	0	0	0	0	1	0	0	0	0	0	0	0	128	78	130	80	0	0	0	0	0	0	3	1	0	0	0	1	0	0
71	1	0	0	0	0	2	0	5	1	0	0	0	0	0	0	0	0	0	0	0	0	0	0	0	0	0	0	0	0	0	0	123	77	120	80	0	0	0	0	0	0	3	1	0	0	0	1	0	0
67	0	0	6	2	2	0	0	0	0	0	0	0	0	0	0	0	0	0	0	0	0	0	0	0	0	0	0	0	0	0	0	129	77	120	80	0	0	0	0	0	0	1	1	0	0	0	1	0	0
54	1	0	0	0	0	2	0	1	0	0	0	0	0	0	0	0	0	0	0	0	0	0	0	0	0	0	0	0	0	0	0	151	88	160	90	0	0	0	0	0	0	4	1	0	0	0	1	0	0
72	0	1	5	2	2	2	0	7	0	0	0	0	0	0	0	0	0	0	0	0	0	0	0	0	0	0	0	0	0	0	0	90	60	97	63	0	0	0	0	1	0	2	1	0	0	0	1	0	0
57	1	0	0	0	2	3	0	7	0	1	0	0	0	0	0	0	0	0	0	0	0	0	0	0	0	0	0	0	0	0	0	120	80	120	80	0	0	0	0	0	0	2	1	0	0	0	1	0	0
61	0	0	0	0	2	0	0	0	0	0	0	0	0	0	0	0	0	0	0	0	0	0	0	0	0	0	0	0	0	0	0	124	78	120	80	0	0	0	0	0	0	4	1	0	0	0	0	0	0
52	0	0	0	0	2	0	0	0	0	0	0	0	0	0	0	0	0	0	0	0	0	0	0	0	0	0	0	0	0	0	0	134	82	133	84	0	0	0	0	0	0	1	1	0	0	0	1	0	0
87	0	0	0	0	2	2	0	7	1	0	0	0	0	0	0	0	0	0	0	0	0	0	0	0	0	0	0	0	0	0	0	154	86	145	84	0	0	0	0	0	0	4	0	0	0	0	1	0	0
69	1	2	2	2	2	2	0	1	1	0	0	0	0	0	0	0	0	0	0	0	0	0	0	0	0	0	0	0	0	0	0	137	81	135	84	0	0	0	0	0	0	4	0	0	0	0	1	0	0
56	1	2	5	2	1	0	0	0	0	0	0	0	0	0	0	0	0	0	0	0	0	0	0	0	0	0	0	0	0	0	0	124	74	114	74	0	0	0	0	0	0	4	2	0	0	0	1	0	0
46	1	1	0	0	0	2	0	6	0	0	0	0	0	0	0	0	0	0	0	0	0	0	0	0	0	0	0	0	0	0	0	123	80	132	81	0	0	1	0	0	0	0	0	2	0	1	0	1	0
52	1	1	0	0	2	2	0	7	0	0	0	0	0	0	0	0	0	0	0	0	0	0	0	0	0	0	0	0	0	0	0	152	90	152	92	0	0	0	0	0	0	1	0	0	0	0	1	0	0
65	1	0	0	0	0	0	0	0	0	0	0	0	0	0	0	0	0	0	0	0	0	0	0	0	1	0	1	0	0	0	0	134	78	123	77	0	0	0	0	0	0	2	1	0	0	0	1	0	0
45	1	0	5	1	2	2	0	3	0	0	0	0	0	0	0	0	0	0	0	0	0	0	0	0	0	0	0	0	0	0	0	125	79	130	80	0	0	0	0	0	0	0	0	2	1	0	1	0	0
53	1	2	1	2	2	2	0	5	1	0	0	0	0	0	0	0	0	0	0	0	0	0	0	0	0	0	0	0	0	0	0	131	81	132	81	1	0	0	0	0	0	1	1	0	0	0	1	0	0
55	1	1	4	2	1	0	0	0	0	0	0	0	0	0	0	0	0	0	0	0	0	0	0	0	0	0	0	0	0	0	0	121	76	124	78	0	0	0	0	0	0	1	4	0	0	0	1	0	0
65	1	1	0	0	1	2	0	5	1	0	0	0	0	0	0	0	0	0	0	0	0	0	0	0	0	0	1	0	0	0	0	140	82	133	82	0	0	0	0	0	0	0	1	3	1	0	0	0	0
62	0	1	5	2	2	2	0	7	0	0	0	0	0	0	0	0	0	0	0	0	0	0	0	0	0	0	0	0	0	0	0	151	88	149	90	0	0	0	0	0	0	1	1	0	0	0	0	0	0
58	1	2	4	1	1	0	0	0	0	0	0	0	0	0	0	0	0	0	0	0	0	0	0	0	0	0	0	0	0	0	0	130	78	128	79	0	0	0	0	0	0	0	0	1	0	0	1	0	0
64	1	0	0	0	0	0	0	0	0	0	0	0	0	0	0	0	0	0	0	0	0	0	0	0	0	0	0	0	0	0	0	133	80	129	80	0	0	0	0	0	0	1	0	0	0	0	1	0	0
69	1	0	3	1	2	0	0	0	1	0	0	0	0	0	0	0	0	0	0	0	0	0	0	0	0	0	0	1	0	0	0	120	72	115	71	0	0	0	0	0	0	4	3	0	0	0	1	0	0
69	0	0	0	0	2	0	0	0	0	0	0	0	0	0	0	0	0	0	0	0	0	0	0	0	0	0	1	0	0	0	0	133	79	128	79	0	0	0	0	0	0	4	1	0	0	0	1	0	0
63	1	1	0	0	2	2	0	5	0	0	0	0	0	0	0	0	0	0	0	0	0	0	0	0	0	0	0	0	0	0	0	149	88	143	88	0	0	0	0	0	0	1	1	0	0	0	1	0	0
62	1	0	3	1	2	3	0	7	0	0	0	0	0	0	0	0	0	0	0	0	0	0	0	0	0	0	0	0	0	0	0	155	89	149	91	0	0	1	0	0	0	1	1	0	0	0	0	1	0
74	0	0	0	0	2	3	0	7	0	0	0	0	0	0	0	0	0	0	0	0	0	0	0	0	0	0	1	0	0	0	0	154	88	148	87	0	0	0	0	0	0	1	1	0	0	0	1	0	0
62	1	0	1	2	2	2	0	1	0	0	0	0	0	0	0	0	0	0	0	0	0	0	0	0	0	0	0	0	0	0	0	134	81	131	81	0	0	0	0	0	0	0	0	2	0	0	1	0	0
45	1	2	0	0	2	2	0	5	0	0	0	0	0	0	0	0	0	0	0	0	0	0	0	0	0	0	0	0	0	0	0	144	88	144	90	0	0	0	0	0	0	0	1	1	0	0	1	0	0
83	1	2	6	2	2	2	0	6	0	1	0	0	0	0	0	0	0	0	0	0	0	0	0	0	0	0	0	0	0	0	0	153	85	140	83	0	0	0	0	0	0	0	0	3	0	0	1	0	0
59	0	1	0	0	2	0	0	0	1	0	0	0	0	0	0	0	0	0	0	0	0	0	0	1	0	0	0	0	0	0	0	123	76	121	76	0	0	0	0	0	0	4	3	0	0	0	0	0	0
41	1	0	0	0	0	2	0	5	0	0	0	0	0	0	0	0	0	0	0	0	0	0	0	0	0	0	0	0	0	0	0	137	85	135	87	0	0	0	0	0	0	4	1	0	0	0	1	0	0
51	1	0	0	0	2	2	0	6	0	0	0	0	0	0	0	0	0	0	0	0	0	0	0	0	0	0	1	0	0	0	0	100	60	100	64	0	0	0	0	0	0	0	0	3	2	0	1	0	0
70	0	0	3	2	1	2	0	6	1	0	0	0	0	0	0	0	0	0	0	0	0	0	0	1	0	0	0	0	0	0	0	163	94	170	100	0	0	0	0	0	0	0	1	3	1	0	0	1	0
60	1	0	0	0	0	2	0	6	0	0	0	0	0	0	0	0	0	0	0	0	0	0	0	0	0	0	1	0	0	0	0	220	110	140	90	0	0	0	0	0	0	0	1	3	0	0	1	0	0
59	1	2	0	0	2	0	0	0	0	0	0	0	0	0	0	0	0	0	0	0	0	0	0	0	0	0	0	0	0	0	0	140	80	90	60	0	0	0	0	0	0	4	1	0	0	0	1	0	0
59	1	0	1	1	2	2	0	2	0	0	0	0	0	0	0	0	0	0	0	0	0	0	0	0	0	0	0	0	0	0	0	120	70	140	90	0	0	0	0	0	0	1	1	0	0	0	1	0	0
62	1	0	1	1	2	2	0	2	0	0	0	0	0	0	0	0	0	0	0	0	0	0	0	0	0	0	0	0	0	0	0	152	89	160	95	0	0	0	0	0	0	1	1	0	0	0	1	0	0
43	1	0	0	0	0	0	0	0	0	0	0	0	0	0	0	0	0	0	0	0	0	0	0	0	0	0	0	0	0	0	0	135	84	140	90	0	0	0	0	0	0	0	1	3	2	0	1	0	0
65	1	0	2	1	2	2	0	2	0	0	0	0	0	0	0	0	0	0	0	0	0	0	0	0	0	0	0	0	0	0	0	145	85	142	88	0	0	0	0	0	0	1	1	0	0	0	1	0	0
77	1	1	0	0	2	3	0	7	0	0	0	0	0	0	0	0	0	0	0	0	0	0	0	0	0	0	0	0	0	0	0	180	100	120	80	0	0	0	0	0	0	1	1	0	0	0	1	0	0
45	1	0	0	0	0	0	0	0	0	0	0	0	0	0	0	0	0	0	0	0	0	0	0	0	0	0	0	0	0	0	0	112	73	105	75	0	0	0	0	0	0	0	2	4	0	0	1	0	0
47	1	1	2	3	1	3	0	3	0	0	0	0	0	0	0	0	0	0	0	0	0	0	0	0	0	0	0	0	0	0	0	130	80	120	80	0	0	0	0	0	0	1	1	0	0	0	0	0	0
75	0	2	3	2	2	2	0	3	1	0	0	0	0	0	0	0	0	0	0	0	0	0	0	1	0	0	0	0	0	0	0	150	90	150	90	0	0	0	0	0	0	0	0	1	0	0	0	0	0
73	1	0	2	1	2	0	0	0	0	0	0	0	0	0	0	0	0	0	0	0	0	0	0	0	0	0	0	0	0	0	0	123	73	110	70	0	0	0	0	0	0	0	0	1	1	0	1	0	0
74	0	2	0	0	0	2	0	3	0	0	0	0	0	0	0	0	0	0	0	0	0	0	0	0	0	0	0	0	0	0	0	210	100	200	100	1	0	0	0	0	0	0	1	3	0	0	1	0	0
55	1	0	1	1	1	2	0	2	0	0	0	0	0	0	0	0	0	0	0	0	0	0	0	0	1	0	0	0	0	0	0	136	84	130	90	0	0	0	0	0	0	0	0	1	0	0	0	0	0
67	1	0	0	0	2	2	0	7	0	0	0	0	0	0	0	0	0	0	0	0	0	0	0	0	0	0	0	0	0	0	0	160	80	160	90	0	0	0	0	0	0	4	1	0	0	0	1	0	0
44	1	2	0	0	2	2	0	6	0	0	0	1	0	0	0	0	0	0	0	0	0	0	0	0	0	0	0	0	0	0	0	144	87	142	88	0	0	0	0	0	0	0	1	0	0	0	1	0	0
45	1	0	1	2	1	0	1	6	0	0	0	0	0	0	0	0	0	0	0	0	0	0	0	0	0	0	0	0	0	0	0	190	100	180	100	0	0	0	0	0	0	1	1	0	0	0	1	0	0
79	0	1	0	0	2	2	0	7	0	0	0	0	0	0	0	0	0	0	0	0	0	0	0	0	0	0	0	0	0	0	0	130	80	140	90	0	0	0	0	0	0	1	0	0	0	0	1	0	0
57	1	3	2	2	1	0	0	0	0	0	0	0	0	0	0	0	0	0	0	0	0	0	0	0	0	0	1	0	0	0	0	135	80	130	80	0	0	0	0	0	0	1	0	0	0	0	1	0	0
65	0	0	0	0	2	2	0	6	0	0	0	0	0	0	0	0	0	0	0	0	0	0	0	0	0	0	0	0	0	0	0	170	90	162	93	0	0	0	0	0	0	1	1	0	0	0	1	0	0
63	1	0	0	0	0	3	0	7	0	0	0	0	0	0	0	0	0	0	0	0	0	0	0	0	0	0	0	0	0	0	0	143	84	130	80	0	0	0	0	0	0	4	1	1	0	0	1	0	0
55	1	0	2	2	2	0	0	0	0	0	0	0	0	0	0	0	0	0	0	0	0	0	0	0	0	0	0	0	0	0	0	129	78	127	79	0	0	0	0	0	0	0	0	0	1	0	1	0	0
75	0	0	0	0	2	2	0	2	0	0	0	0	0	0	0	0	0	0	0	0	0	0	0	0	0	0	0	0	0	0	0	220	140	220	120	1	0	0	0	0	0	4	1	4	0	0	1	0	0
65	0	3	6	1	1	2	0	6	0	0	0	0	0	0	0	0	0	0	0	0	0	0	0	0	0	0	0	0	0	0	0	120	80	120	80	0	0	0	0	0	0	0	0	0	0	0	1	0	0
62	1	0	0	0	2	2	0	2	0	0	0	0	0	0	0	0	0	0	0	0	0	0	0	0	0	0	0	0	0	0	0	153	89	160	90	0	0	0	0	0	0	1	1	0	0	0	1	0	0
37	1	0	0	0	0	0	0	0	0	0	0	0	0	0	0	0	0	0	0	0	0	0	0	0	0	0	0	0	0	0	0	110	70	114	75	0	0	0	0	0	1	4	2	0	0	0	1	0	0
61	0	0	1	2	1	2	0	7	0	0	0	0	0	0	0	0	0	0	0	0	0	0	0	0	0	0	0	0	0	0	0	160	90	160	90	0	0	0	0	0	0	1	1	3	0	0	1	0	0
60	1	2	1	2	2	2	0	3	0	0	0	0	0	0	0	0	0	0	0	0	0	0	0	0	0	0	1	0	0	0	0	153	86	160	80	0	0	0	0	0	0	0	1	2	0	0	1	0	0
53	0	0	0	0	0	2	0	1	0	0	0	0	0	0	0	0	0	0	0	0	0	0	0	0	0	0	0	0	0	0	0	148	84	160	80	0	0	0	0	0	0	0	0	0	0	0	1	0	0
64	0	0	0	0	2	2	0	7	0	0	0	0	0	0	0	0	0	0	0	0	0	0	0	0	0	0	0	0	0	0	0	220	120	180	100	0	0	0	0	0	0	1	1	3	0	0	0	0	0
74	0	2	0	0	2	2	0	7	0	0	0	0	0	0	0	0	0	0	0	0	0	0	0	1	0	0	0	0	0	0	0	141	82	130	80	0	0	0	0	0	0	0	0	0	0	0	1	0	0
70	1	0	0	0	2	2	0	5	0	0	0	0	0	0	0	0	0	0	0	0	0	0	0	0	0	0	0	0	0	0	0	127	79	120	80	0	0	0	0	0	0	4	1	4	0	0	1	0	0
83	0	0	6	2	2	2	0	6	3	0	0	0	0	0	0	0	0	0	0	0	0	0	0	0	0	0	0	0	0	0	0	150	90	140	80	1	0	0	0	0	0	4	1	0	0	0	1	0	0
66	1	2	6	2	2	2	0	7	0	0	0	0	0	0	0	0	0	0	0	0	0	0	0	1	0	0	0	0	0	0	0	200	100	150	90	0	0	0	0	0	0	1	1	0	0	0	0	0	0
65	1	0	3	2	2	2	0	6	0	0	0	0	0	0	0	0	0	0	0	0	0	0	0	0	0	0	0	0	0	0	0	143	85	140	90	0	0	0	0	0	0	1	1	0	0	0	0	0	0
62	1	1	6	1	1	2	0	1	0	0	0	0	0	0	0	0	0	0	0	0	0	0	0	0	0	0	0	0	0	0	0	160	100	170	110	0	0	0	0	0	0	1	1	0	0	0	1	0	0
57	1	0	0	0	2	0	0	0	0	0	0	0	0	0	0	0	0	0	0	0	0	0	0	1	0	0	0	0	0	0	0	160	110	130	90	0	0	0	0	0	0	1	1	0	0	0	0	0	0
50	1	0	1	1	2	2	0	2	0	0	0	0	0	0	0	0	0	0	0	0	0	0	0	0	0	0	0	0	0	0	0	151	92	160	100	0	0	0	0	0	0	1	1	0	2	0	1	0	0
48	1	0	6	2	1	0	0	0	0	0	0	0	0	0	0	0	0	0	0	0	0	0	0	0	0	0	0	0	0	0	0	104	67	100	60	0	0	0	0	0	0	0	0	4	0	0	1	0	0
53	0	0	0	0	2	2	0	2	0	0	0	0	0	0	0	0	0	0	0	0	0	0	0	0	0	0	0	0	0	0	0	170	90	130	80	0	0	0	0	0	0	4	1	0	0	0	1	0	0
57	1	0	0	0	0	0	0	0	0	0	0	0	0	0	0	0	0	0	0	0	0	0	0	0	0	0	0	0	0	0	0	160	110	150	90	0	0	0	0	0	0	0	0	3	0	0	1	0	0
52	1	0	0	0	0	0	1	7	0	0	0	0	0	0	0	0	0	0	0	0	0	0	0	0	0	0	1	0	0	0	0	140	84	150	80	0	0	0	0	0	0	4	1	0	0	0	1	0	0
56	0	0	0	0	2	3	0	7	0	0	0	0	0	0	0	0	0	0	0	0	0	0	0	0	0	0	0	0	0	0	0	160	100	240	130	0	0	0	0	0	0	0	0	1	1	0	1	0	0
68	0	0	6	1	1	2	0	7	0	0	0	0	0	1	0	0	0	0	0	0	0	0	0	0	0	0	0	0	0	0	0	160	90	140	90	0	0	1	0	0	0	0	0	2	0	0	0	1	0
68	1	3	6	1	1	2	0	6	0	0	0	0	0	0	0	0	0	0	0	0	0	0	0	0	0	0	0	0	0	0	0	160	100	130	90	0	0	0	0	0	0	0	0	2	0	0	1	0	0
53	1	1	0	0	0	0	0	0	0	0	0	0	0	0	0	0	0	0	0	0	0	0	0	0	0	0	0	0	0	0	0	90	60	110	80	0	0	0	0	0	0	0	0	4	1	0	1	0	0
83	0	0	6	2	2	2	0	7	0	0	0	0	0	0	0	0	0	0	0	0	0	0	0	0	0	0	0	0	0	0	0	200	100	210	100	0	0	1	0	0	0	0	0	3	0	0	0	1	0
43	1	3	2	2	2	0	0	0	0	0	0	0	0	0	0	0	0	0	0	0	0	0	0	0	0	0	0	0	0	0	0	121	78	120	80	0	0	0	0	0	0	2	1	0	0	0	0	0	0
37	1	0	0	0	0	0	0	0	0	0	0	0	0	0	0	0	0	0	0	0	0	0	0	0	0	0	1	0	0	0	0	115	73	110	70	0	0	0	0	0	0	4	4	0	0	0	0	0	0
63	0	1	2	1	2	3	0	7	0	0	0	0	0	0	0	0	0	0	0	0	0	0	0	0	0	0	0	0	0	0	0	135	80	180	110	0	0	0	0	0	0	4	1	0	0	0	0	0	0
63	1	0	0	0	2	0	0	0	0	0	0	1	0	0	0	0	0	0	0	0	0	0	0	0	0	0	1	0	0	0	0	110	68	90	60	0	0	1	0	0	0	1	1	0	0	0	1	0	0
76	0	1	3	2	2	2	0	2	0	0	0	0	0	0	0	0	0	0	0	0	0	0	0	0	0	0	0	0	0	0	0	158	88	160	90	0	0	0	0	0	0	0	2	3	3	0	1	0	0
76	1	0	1	1	0	2	0	1	0	0	0	0	0	0	0	0	0	0	0	0	0	0	0	0	0	0	1	0	0	0	0	136	79	140	80	0	0	0	0	0	0	0	0	1	1	0	1	0	0
68	0	1	0	0	2	2	0	7	0	0	0	0	0	0	0	0	0	0	0	0	0	0	0	1	0	0	0	0	0	0	0	157	90	156	92	0	0	0	0	0	0	1	1	0	0	0	1	0	0
59	1	1	5	2	1	2	0	5	0	0	0	0	0	0	0	0	0	0	0	0	0	0	0	0	0	0	0	0	0	0	0	100	70	120	80	0	0	0	0	0	0	4	3	0	0	0	1	0	0
68	1	2	0	0	2	0	1	7	0	0	0	0	0	0	0	0	0	0	0	0	0	0	0	0	0	0	0	0	0	0	0	220	110	210	130	0	0	0	0	0	0	1	1	0	0	0	1	0	0
53	0	0	3	2	2	0	1	7	0	0	0	0	0	0	0	0	0	0	0	0	0	0	0	1	0	0	0	0	0	0	0	151	89	150	91	0	0	0	0	0	0	1	1	0	0	0	1	0	0
42	1	0	1	2	1	0	0	0	0	0	0	0	0	0	0	0	0	0	0	0	0	0	0	0	0	0	0	0	0	0	0	124	79	129	82	0	0	0	0	0	0	1	1	0	0	0	1	0	0
72	1	1	4	2	1	0	0	0	0	0	0	0	0	0	0	0	0	0	0	0	0	0	0	0	0	0	0	0	0	0	0	130	78	120	80	0	0	0	0	0	0	1	1	0	0	0	1	0	0
63	0	0	0	0	0	2	0	5	0	0	0	0	0	0	0	0	0	0	0	0	0	0	0	0	0	0	0	0	1	0	0	120	70	160	80	0	0	0	0	0	0	4	3	0	0	0	1	0	0
66	1	1	6	2	1	2	0	2	0	0	0	0	0	0	0	0	0	0	0	0	0	0	0	0	0	0	1	0	0	0	0	178	97	200	100	0	0	0	0	0	0	1	1	0	0	0	1	0	0
62	0	1	4	2	1	3	0	5	0	0	0	0	0	0	0	0	0	0	0	0	0	0	0	0	0	0	0	0	0	0	0	180	90	140	100	0	0	0	0	0	0	1	1	0	0	0	1	0	0
62	0	0	3	2	1	2	0	7	0	0	0	0	0	0	0	0	0	0	0	0	0	0	0	1	0	0	1	0	0	0	0	170	99	170	110	0	0	0	0	0	0	4	3	0	0	0	1	0	0
72	0	2	2	2	1	3	0	7	0	0	0	0	0	0	0	0	0	0	0	0	0	0	0	0	0	1	0	0	0	0	0	142	82	140	80	1	0	0	0	0	0	1	1	1	0	0	1	0	0
63	0	1	2	2	2	2	0	1	0	0	0	0	0	0	0	0	0	0	0	0	0	0	0	0	0	0	0	0	0	0	0	160	100	150	100	0	0	0	0	0	0	1	1	0	0	0	1	0	0
42	1	0	0	0	2	0	0	0	0	0	0	0	0	0	0	0	0	0	0	0	0	0	0	0	0	0	0	0	0	0	0	138	88	140	100	0	0	0	0	0	0	1	1	0	0	0	0	0	0
74	1	0	0	0	2	2	0	2	0	0	0	0	0	0	0	0	0	0	0	0	0	0	0	1	0	0	1	0	0	0	0	140	80	160	90	0	0	0	0	0	0	4	1	0	0	0	0	0	0
44	0	0	0	0	0	0	1	7	0	0	0	0	0	0	0	0	0	0	0	0	0	0	0	0	0	0	0	0	0	0	0	155	100	190	110	0	0	0	0	0	0	0	0	1	1	0	1	0	0
50	1	0	0	0	2	0	0	0	0	0	0	0	0	0	0	0	0	0	0	0	0	0	0	0	0	0	1	0	0	0	0	130	80	124	82	0	0	0	0	0	0	4	1	0	0	0	1	0	0
80	0	0	0	0	0	0	0	0	0	0	0	0	0	0	0	0	0	0	0	0	0	0	0	0	0	0	0	0	0	0	0	140	80	110	70	0	0	0	0	0	0	0	2	4	2	0	1	0	0
65	0	0	6	2	1	0	0	0	0	0	0	0	0	0	0	0	0	0	0	0	0	0	0	0	0	0	0	1	0	0	0	140	90	120	80	0	0	0	0	0	0	0	0	1	0	0	0	0	0
64	1	3	3	2	1	2	0	3	0	0	0	0	0	0	0	0	0	0	0	0	0	0	0	0	0	0	0	0	0	0	0	168	95	190	100	0	0	0	0	0	0	4	1	0	0	0	0	0	0
40	1	0	0	0	0	0	0	0	0	0	0	0	0	0	0	0	0	0	0	0	0	0	0	0	0	0	0	0	0	0	0	123	81	120	90	0	0	0	0	0	0	4	1	0	0	0	1	0	0
48	1	1	6	2	2	0	0	0	0	0	0	0	0	0	0	0	0	0	0	0	0	0	0	0	0	0	0	0	0	0	0	123	77	120	80	0	0	0	0	0	0	1	1	0	0	0	1	0	0
59	1	0	6	2	1	0	0	0	0	0	0	0	0	0	0	0	0	0	0	0	0	0	0	0	0	0	1	0	0	0	0	90	60	130	80	0	0	0	0	0	0	0	0	2	1	0	1	0	0
55	1	0	1	2	1	2	0	4	0	0	0	0	0	0	0	0	0	0	0	0	0	0	0	0	0	0	0	0	0	0	0	157	93	160	100	0	0	0	0	0	0	0	0	1	0	0	1	0	0
73	0	1	2	2	2	3	0	3	0	0	0	0	0	0	0	0	0	0	0	0	0	0	0	0	0	0	0	0	0	0	0	150	100	115	80	0	0	0	0	0	0	0	1	2	0	0	1	0	0
65	0	0	5	2	2	0	0	0	0	0	0	0	0	0	0	0	0	0	0	0	0	0	0	0	0	0	0	0	0	0	0	136	79	131	81	0	0	0	0	0	0	1	0	0	0	0	0	0	0
37	1	0	0	0	0	0	0	0	0	0	0	0	0	0	0	0	0	0	0	0	0	0	0	0	0	0	0	0	0	0	0	123	78	120	80	0	0	0	0	0	0	4	1	0	0	0	1	0	0
67	0	0	0	0	0	0	1	4	0	1	0	0	0	0	0	0	0	0	0	0	0	0	0	0	0	0	1	0	0	0	0	90	60	60	40	0	0	0	0	0	0	0	0	4	1	0	0	0	0
54	1	0	0	0	0	0	0	0	0	0	0	0	0	0	0	0	0	0	0	0	0	0	0	0	0	0	0	0	0	0	0	130	80	127	81	0	0	0	0	0	0	4	2	0	0	0	1	0	0
74	1	1	2	2	2	0	0	0	0	0	0	0	0	0	0	0	0	0	0	0	0	0	0	0	0	0	0	0	0	0	0	111	66	90	60	0	0	0	0	0	0	0	0	1	0	0	1	0	0
80	1	2	6	2	2	3	0	7	0	0	0	0	0	0	0	0	0	0	0	0	0	0	0	0	0	0	0	0	0	0	0	160	100	151	93	0	0	0	0	0	0	1	0	1	0	0	0	0	0
48	1	1	3	2	1	2	0	5	0	0	0	0	0	0	0	0	0	0	0	0	0	0	0	0	0	0	0	0	0	0	0	120	80	110	70	0	0	0	0	0	0	1	1	2	0	0	0	0	0
43	1	1	0	0	2	0	0	0	0	0	0	0	0	0	0	0	0	0	0	0	0	0	0	0	0	0	0	0	0	0	0	123	78	120	80	0	0	0	0	0	0	1	1	1	0	0	1	0	0
64	1	1	0	0	2	0	0	0	0	0	0	0	0	0	0	0	0	0	0	0	0	0	0	1	0	0	1	0	0	0	0	160	90	130	90	0	0	0	0	0	0	2	1	1	0	0	1	0	0
63	0	0	4	2	1	2	0	5	0	0	0	0	0	1	0	0	0	0	0	0	0	0	0	0	0	0	0	0	0	0	1	145	86	150	90	0	0	1	0	0	0	1	1	0	0	0	0	1	0
62	1	0	0	0	0	3	0	7	0	0	0	0	0	0	0	0	0	0	0	0	0	0	0	0	0	0	0	0	0	0	0	133	84	120	90	0	0	0	0	0	0	4	1	0	0	0	0	0	0
41	1	0	0	0	0	0	0	0	0	0	0	0	0	0	0	0	0	0	0	0	0	0	0	0	0	0	0	0	0	0	0	109	69	100	60	0	0	0	0	0	0	1	1	0	3	0	1	0	0
70	1	0	1	2	1	0	0	0	0	0	0	0	0	0	0	0	0	0	0	0	0	0	0	0	0	0	0	0	0	0	0	122	73	110	70	0	0	0	0	0	0	3	1	0	0	0	1	0	0
34	1	0	0	0	0	0	0	0	0	0	0	0	0	0	0	0	0	0	0	0	0	0	0	0	0	0	0	0	0	0	0	125	70	100	60	0	0	0	0	0	0	1	1	0	0	0	1	0	0
63	0	1	2	2	1	2	0	7	0	0	0	0	0	0	0	0	0	0	0	0	0	0	0	1	0	0	0	0	0	0	1	160	100	160	100	0	0	0	0	0	0	1	1	0	0	0	1	0	0
50	1	0	2	2	1	0	1	3	0	0	0	0	0	0	0	0	0	0	0	0	0	0	0	1	0	0	0	0	0	0	0	152	91	160	100	0	0	0	0	0	0	0	0	2	0	0	1	0	0
70	0	1	5	2	1	2	0	5	0	0	0	0	0	0	0	0	0	0	0	0	0	0	0	0	0	0	0	0	0	0	0	170	95	170	100	0	0	0	0	0	0	0	0	1	1	0	1	0	0
49	1	0	0	0	0	0	0	0	0	0	0	0	0	0	0	0	0	0	0	0	0	0	0	0	0	0	0	0	0	0	0	127	79	120	80	0	0	0	0	0	0	4	1	0	0	0	1	0	0
42	1	0	0	0	0	0	0	0	0	0	0	0	0	0	0	0	0	0	0	0	0	0	0	0	0	0	0	0	0	0	0	120	77	120	80	0	0	0	0	0	0	1	1	0	0	0	0	0	0
66	0	0	0	0	0	2	0	7	0	0	0	0	0	0	0	0	0	0	0	0	0	0	0	0	0	0	0	0	0	0	0	170	90	140	90	0	0	0	0	0	0	0	0	0	2	0	1	0	0
60	0	2	6	2	1	2	0	6	0	0	0	0	0	0	0	0	0	0	0	0	0	0	0	0	0	0	0	0	0	0	0	110	80	100	60	0	0	0	0	0	0	0	0	1	0	0	1	0	0
35	1	0	0	0	0	2	0	1	0	0	0	0	0	0	0	0	0	0	0	0	0	0	0	0	0	0	0	0	0	0	0	180	90	150	90	0	0	0	0	0	0	3	1	0	0	0	1	0	0
38	1	1	6	2	1	0	0	0	0	0	0	0	0	0	0	0	0	0	0	0	0	0	0	0	0	0	0	0	0	0	0	100	60	100	70	0	0	0	0	0	0	0	0	1	0	0	1	0	0
64	0	0	0	0	2	2	0	1	2	0	0	0	0	0	0	0	0	0	0	0	0	0	0	1	0	0	0	0	0	0	0	150	90	142	90	0	0	0	0	0	0	4	1	0	0	0	0	0	0
63	0	1	6	2	1	2	0	7	0	0	0	0	0	0	0	0	0	0	0	0	0	0	0	0	1	0	0	0	0	0	0	120	80	180	130	0	0	0	0	0	0	0	0	2	0	0	1	0	0
37	1	0	6	2	1	0	0	0	0	0	0	0	0	0	0	0	0	0	0	0	0	0	0	0	0	0	0	0	0	0	0	180	80	150	90	0	0	0	0	0	0	4	4	0	0	0	1	0	0
61	1	0	0	0	0	3	0	7	0	0	0	0	0	0	0	0	0	0	0	0	0	0	0	0	0	0	0	0	0	0	0	80	60	140	80	0	0	0	0	0	0	4	4	0	0	0	1	0	0
32	0	0	1	2	1	0	0	0	0	0	0	0	0	0	0	0	0	0	0	0	0	0	0	0	0	0	0	0	0	0	0	120	80	110	60	0	0	0	0	0	0	4	1	0	0	0	1	0	0
61	1	0	6	2	1	2	0	5	0	0	0	0	0	0	0	0	0	0	0	0	0	0	0	0	0	0	0	1	0	0	0	131	79	120	80	0	0	0	0	0	0	4	1	0	0	0	1	0	0
77	0	2	0	0	2	2	0	7	0	0	0	0	0	0	0	0	0	0	0	0	0	0	0	1	0	0	0	0	0	0	0	168	89	170	80	1	0	0	0	0	0	1	1	1	0	0	1	0	0
65	1	0	0	0	0	0	0	0	0	0	0	0	0	0	0	0	0	0	0	0	0	0	0	0	0	0	0	0	0	0	0	115	70	130	90	0	0	0	0	0	0	0	0	1	2	0	1	0	0
44	1	0	4	2	1	2	0	7	0	0	0	0	0	0	0	0	0	0	0	0	0	0	0	0	0	0	0	0	0	0	0	155	90	160	90	0	0	0	0	0	0	0	0	2	2	0	1	0	0
53	0	0	0	0	0	3	0	6	0	0	0	0	0	0	0	0	0	0	0	0	0	0	0	0	0	0	0	0	0	0	0	140	80	160	90	0	0	0	0	0	0	4	1	0	0	0	1	0	0
56	1	1	0	0	0	2	0	5	0	0	0	0	0	0	0	0	0	0	0	0	0	0	0	0	0	0	0	0	0	0	0	170	100	150	90	0	0	0	0	0	0	2	1	0	0	0	0	0	0
64	1	3	6	2	2	2	0	5	0	0	0	0	0	0	0	0	0	0	0	0	0	0	0	1	0	0	0	0	0	0	0	145	95	120	70	0	0	0	0	0	0	1	1	0	0	0	1	0	0
55	1	0	6	2	1	2	0	5	0	0	0	0	0	0	0	0	0	0	0	0	0	0	0	0	0	0	0	0	0	0	0	170	90	180	120	0	0	0	0	0	0	0	0	4	3	0	1	0	0
75	0	1	5	3	2	3	0	6	4	0	1	0	0	0	0	0	0	0	0	0	0	0	0	1	0	0	0	0	0	0	0	130	80	110	80	1	0	0	0	0	0	2	1	0	0	0	0	0	0
63	0	0	1	3	2	2	0	6	0	0	0	0	0	0	0	0	0	0	0	0	0	0	0	1	0	0	0	0	0	0	0	148	86	148	89	0	0	0	0	0	0	0	1	0	0	0	1	0	0
62	1	0	6	1	2	0	0	0	0	0	0	0	0	0	0	0	0	0	0	0	0	0	0	0	0	0	0	0	0	0	0	140	80	150	80	0	0	0	0	0	0	4	3	0	0	0	0	0	0
69	1	0	0	0	0	0	0	0	0	0	0	0	0	0	0	0	0	0	0	0	0	0	0	0	0	0	1	0	0	0	0	134	82	130	90	0	0	0	0	0	0	0	0	2	0	0	1	0	0
64	1	0	3	2	2	2	0	6	0	0	0	0	0	0	0	0	0	0	0	0	0	0	0	1	0	0	0	0	0	0	0	150	70	170	100	0	0	0	0	0	0	4	1	0	0	0	1	0	0
64	0	0	5	2	1	2	0	5	0	0	0	0	0	0	0	0	0	0	0	0	0	0	0	1	0	0	0	0	0	0	0	130	70	130	90	1	0	0	0	0	0	0	0	2	0	0	0	0	0
62	1	0	0	0	0	3	0	7	0	0	0	0	0	0	0	0	0	0	0	0	0	0	0	0	0	0	0	0	0	0	0	154	91	140	100	0	0	0	0	0	0	4	3	0	0	0	0	0	0
75	1	1	5	2	2	2	0	3	3	0	0	0	0	0	0	0	0	0	0	0	0	0	0	0	0	0	0	0	0	0	0	149	86	140	90	0	0	0	0	0	0	1	1	0	0	0	1	0	0
70	0	1	0	0	2	2	0	6	0	0	0	0	0	0	0	0	0	0	0	0	0	0	0	0	0	0	0	0	0	0	0	170	90	140	80	0	0	0	0	0	0	1	1	1	0	0	1	0	0
67	0	1	0	0	2	2	0	7	0	0	0	0	0	0	0	0	0	0	0	0	0	0	0	1	0	0	0	0	0	0	0	155	89	150	90	0	0	0	0	0	0	1	1	0	0	0	1	0	0
53	1	0	0	0	2	0	0	0	0	0	0	0	0	0	0	0	0	0	0	0	0	0	0	0	0	0	0	0	0	0	0	100	60	120	80	0	0	0	0	0	0	0	0	4	1	0	1	0	0
73	0	0	0	0	0	0	0	0	0	0	0	0	0	0	0	0	0	0	0	0	0	0	0	0	0	0	0	0	0	0	0	80	60	70	40	0	0	0	0	0	0	0	1	2	0	0	1	0	0
68	1	2	6	2	2	2	0	7	3	0	0	0	0	1	0	0	0	0	0	0	0	0	0	0	0	0	0	0	0	0	0	152	88	160	90	0	0	1	0	0	0	1	1	1	0	0	1	0	0
77	0	3	3	2	2	2	0	6	3	0	0	0	0	0	0	0	0	0	0	0	0	0	0	1	0	0	0	0	0	0	0	161	92	160	100	0	0	0	0	0	0	0	0	4	0	0	1	0	0
82	0	2	5	2	2	2	0	7	0	0	0	0	0	0	0	0	0	0	0	0	0	0	0	1	0	0	0	0	0	0	0	130	80	150	90	0	0	0	0	0	0	4	1	0	0	0	0	0	0
76	0	1	0	0	2	2	0	6	0	0	0	0	0	0	0	0	0	0	0	0	0	0	0	1	0	0	0	0	0	0	0	176	97	190	100	0	0	0	0	0	0	0	1	4	0	0	0	0	0
59	1	2	0	0	0	0	0	0	0	0	0	0	0	0	0	0	0	0	0	0	0	0	0	0	0	0	0	0	0	0	0	100	60	105	70	0	0	0	0	0	0	2	1	1	0	0	1	0	0
49	1	0	0	0	2	2	0	5	0	0	0	0	0	0	0	0	0	0	0	0	0	0	0	0	0	0	0	0	0	0	0	143	87	160	90	0	0	0	0	0	0	0	0	4	0	0	1	0	0
62	1	0	0	0	0	0	0	0	0	0	0	0	0	0	0	0	0	0	0	0	0	0	0	0	0	0	0	0	0	0	0	110	71	100	70	0	0	0	0	0	0	4	1	0	0	0	1	0	0
56	1	2	0	0	2	2	0	1	0	0	0	0	0	0	0	0	0	0	0	0	0	0	0	0	0	0	1	0	0	0	0	160	100	110	80	0	0	0	0	0	0	0	0	3	0	0	1	0	0
35	1	0	0	0	0	2	0	1	0	0	0	0	0	0	0	0	0	0	0	0	0	0	0	0	0	0	0	0	0	0	0	129	87	140	100	0	0	0	0	0	0	0	0	4	0	0	1	0	0
66	1	0	0	0	0	2	0	3	0	0	0	0	0	0	0	0	0	0	0	0	0	0	0	0	0	0	0	0	0	0	0	138	85	130	90	0	0	0	0	0	0	0	1	2	0	0	1	0	0
57	1	0	2	2	1	2	0	4	3	0	0	0	0	1	0	0	0	0	0	0	0	0	0	0	0	0	0	0	0	0	0	140	86	140	95	0	0	1	0	0	0	1	1	0	0	0	0	1	0
72	0	1	0	0	2	3	0	7	0	0	0	0	0	0	0	0	0	0	0	0	0	0	0	0	0	0	0	0	0	0	0	106	62	80	40	0	1	0	0	0	0	1	1	0	0	0	0	0	0
61	1	2	6	2	2	2	0	5	0	0	0	0	0	0	0	0	0	0	0	0	0	0	0	0	0	0	0	0	0	0	0	137	84	130	90	0	0	0	0	0	0	0	0	2	0	0	0	0	0
46	0	0	0	0	2	0	1	4	0	0	0	0	0	0	0	0	0	0	0	0	0	0	0	0	0	0	0	0	0	0	0	128	80	120	80	0	0	0	0	0	0	1	1	0	0	0	1	0	0
60	1	0	3	1	2	2	0	7	0	0	0	0	0	0	0	0	0	0	0	0	0	0	0	0	0	0	1	0	0	0	0	155	89	160	90	0	0	0	0	0	0	4	1	0	0	0	1	0	0
34	1	0	0	0	2	0	0	0	0	0	0	0	0	0	0	0	0	0	0	0	0	0	0	0	0	0	0	0	0	0	0	110	70	130	80	0	0	0	0	0	0	1	2	0	0	0	1	0	0
67	1	1	6	2	1	0	0	0	4	0	0	0	0	1	0	0	0	0	0	0	0	0	0	0	0	0	0	0	0	0	0	120	70	115	70	0	0	1	0	0	0	0	0	2	1	0	0	1	0
70	0	0	0	0	0	0	1	3	0	0	0	0	0	0	0	0	0	0	0	0	0	0	0	0	0	0	0	0	1	0	0	170	100	120	80	0	0	0	0	0	0	4	1	0	0	0	1	0	0
55	1	0	0	0	0	2	0	6	0	0	0	0	0	0	0	0	0	0	0	0	0	0	0	0	0	0	0	0	0	0	0	159	95	170	100	1	0	0	0	0	0	0	1	2	1	0	1	0	0
64	0	1	1	2	2	3	0	6	4	0	0	1	0	0	0	0	0	0	0	0	0	0	0	0	0	0	0	0	0	0	0	150	80	150	110	1	0	0	0	0	0	3	2	0	0	0	1	0	0
75	0	2	3	1	2	3	0	6	0	0	0	0	0	0	0	0	0	0	0	0	0	0	0	1	0	0	0	0	0	0	0	140	80	160	90	0	0	0	0	0	0	4	0	0	0	0	1	0	0
56	1	0	0	0	0	1	0	3	0	0	0	0	0	0	0	0	0	0	0	0	0	0	0	0	0	0	0	0	0	0	0	120	70	140	90	0	0	0	0	0	0	4	3	0	0	0	1	0	0
50	1	1	2	2	1	0	0	0	0	0	0	0	0	0	0	0	0	0	0	0	0	0	0	0	0	0	1	0	0	0	0	113	72	110	70	0	0	0	0	0	0	4	1	0	0	0	0	0	0
68	1	1	0	0	2	2	0	7	0	0	0	0	0	0	0	0	0	0	0	0	0	0	0	0	0	0	0	0	0	0	0	130	70	120	70	0	0	0	0	0	0	0	1	0	0	0	1	0	0
76	0	3	0	0	2	2	0	7	4	0	0	0	0	0	0	0	0	0	1	0	0	0	0	1	0	0	0	0	0	0	0	135	78	110	70	0	0	1	0	0	0	4	0	0	0	0	0	1	0
73	0	2	1	2	2	2	0	7	0	0	0	0	0	0	0	0	0	0	0	0	0	0	0	1	0	0	0	0	0	0	0	184	100	200	100	0	0	0	0	0	0	0	0	1	0	0	1	0	0
53	0	3	0	0	2	0	0	0	0	0	0	0	0	0	0	0	0	0	0	0	0	0	0	1	0	0	0	0	0	0	0	141	86	150	90	0	0	0	0	0	0	0	1	2	2	0	1	0	0
65	1	2	1	2	2	0	0	0	0	0	0	0	0	0	0	0	0	0	0	0	0	0	0	0	0	0	0	0	0	0	0	125	75	114	73	0	0	0	0	0	0	4	0	0	0	0	1	0	0
66	1	0	5	2	1	2	0	2	0	0	0	0	0	0	0	0	0	0	0	0	0	0	0	0	0	0	0	0	0	0	0	140	90	150	90	0	0	0	0	0	0	4	0	0	0	0	1	0	0
66	0	1	1	1	2	2	0	7	0	0	0	0	0	0	0	0	0	0	0	0	0	0	0	1	0	0	1	0	0	0	0	153	92	160	100	0	0	0	0	0	0	2	1	0	0	0	1	0	0
77	1	0	0	0	0	2	0	7	0	0	0	0	0	0	0	0	0	0	0	0	0	0	0	1	0	0	0	0	0	0	0	144	85	140	90	0	0	0	0	0	0	0	0	4	0	0	1	0	0
63	0	0	3	1	2	2	0	7	0	0	0	0	0	0	0	0	0	0	0	0	0	0	0	1	0	0	0	0	0	0	0	188	104	210	110	0	0	0	0	0	0	1	1	0	0	0	1	0	0
39	1	0	0	0	0	2	0	2	0	0	0	0	0	0	0	0	0	0	0	0	0	0	0	0	0	0	0	0	0	0	0	130	80	130	80	0	0	0	0	0	0	1	1	0	0	0	1	0	0
70	0	0	0	0	0	2	0	7	0	0	0	0	0	0	0	0	0	0	0	0	0	0	0	0	0	0	0	0	0	0	0	151	89	154	91	0	0	0	0	0	0	4	1	0	0	0	1	0	0
63	1	1	5	1	1	3	0	6	0	0	0	0	0	0	0	0	0	0	0	0	0	0	0	0	0	0	0	0	0	0	0	156	86	160	80	0	0	0	0	0	0	1	1	0	0	0	1	0	0
62	1	0	1	3	2	2	0	6	0	0	0	0	0	0	0	0	0	0	0	0	0	0	0	0	0	0	0	0	0	0	0	132	80	120	80	0	0	0	0	0	0	1	1	0	0	0	1	0	0
71	0	1	6	2	2	2	0	7	0	0	0	0	0	0	0	0	0	0	0	0	0	0	0	0	0	0	0	0	0	0	0	180	90	160	90	0	0	0	0	0	0	1	1	0	1	0	1	0	0
62	1	3	2	1	2	0	0	0	0	0	0	0	0	0	0	0	0	0	0	0	0	0	0	0	0	0	0	0	0	0	0	129	78	120	80	0	0	0	0	0	0	1	1	1	0	0	1	0	0
70	0	0	4	2	1	2	0	6	0	0	0	0	0	0	0	0	0	0	0	0	0	0	0	0	0	0	0	0	0	0	0	200	120	120	80	0	0	0	0	0	0	0	2	0	3	0	1	0	0
46	1	2	3	2	2	2	0	2	0	0	0	0	0	0	0	0	0	0	0	0	0	0	0	0	0	0	0	0	0	0	0	139	85	138	88	0	0	0	0	0	0	0	1	3	0	0	1	0	0
81	0	0	2	2	2	0	1	5	0	0	0	0	0	0	0	0	0	0	0	0	0	0	0	0	0	0	0	0	0	0	0	110	70	160	80	0	0	0	0	0	0	0	1	0	1	0	1	0	0
55	1	0	0	0	0	2	0	4	0	0	0	0	0	0	0	0	0	0	0	0	0	0	0	0	0	0	0	0	0	0	0	140	90	160	110	0	0	0	0	0	0	1	4	0	0	0	0	0	0
37	1	0	0	0	0	2	0	4	0	0	0	0	0	0	0	0	0	0	0	0	0	0	0	0	0	0	0	0	0	0	0	135	86	140	90	0	0	0	0	0	0	4	3	0	0	0	1	0	0
54	1	0	2	2	2	0	1	7	0	0	0	0	0	0	0	0	0	0	0	0	0	0	0	1	0	0	0	0	0	0	0	189	104	220	110	0	0	0	0	0	0	2	1	1	0	0	0	0	0
55	1	0	3	2	1	2	0	7	0	0	0	0	0	0	0	0	0	0	0	0	0	0	0	0	0	0	0	0	0	0	0	139	85	130	90	0	0	0	0	0	0	4	1	0	0	0	0	0	0
60	1	0	0	0	0	0	0	0	0	0	0	0	0	0	0	0	0	0	0	0	0	0	0	0	0	0	0	0	0	0	0	141	84	150	90	0	0	0	0	0	0	4	3	0	0	0	0	0	0
64	0	0	0	0	0	2	0	7	0	0	0	0	0	0	0	0	0	0	0	0	0	0	0	0	0	0	0	0	0	0	0	165	95	160	100	0	0	0	0	0	0	1	1	0	0	0	1	0	0
61	1	1	6	2	1	0	0	0	0	0	0	0	0	0	0	0	0	0	0	0	0	0	0	0	0	0	0	0	0	0	0	131	78	130	80	0	0	0	0	0	0	0	0	1	0	0	1	0	0
71	1	0	0	0	0	0	0	0	0	0	0	0	0	0	0	0	0	0	0	0	0	0	0	0	0	0	0	0	0	0	0	133	78	126	78	0	0	0	0	0	0	3	0	0	0	0	1	0	0
33	1	1	0	0	2	0	0	0	0	0	0	0	0	0	0	0	0	0	0	0	0	0	0	0	0	0	0	0	0	0	0	129	84	130	90	0	0	0	0	0	0	4	1	0	0	0	1	0	0
32	1	0	2	2	1	2	0	1	0	1	0	0	0	0	0	0	0	0	0	0	0	0	0	0	0	0	0	0	0	0	0	143	90	150	100	0	0	0	0	0	0	0	0	1	0	0	1	0	0
52	1	0	0	0	2	2	0	7	0	0	0	0	0	0	0	0	0	0	0	0	0	0	0	0	0	0	0	0	0	0	0	131	77	120	70	0	0	0	0	0	0	0	2	0	2	0	0	0	0
63	1	1	2	2	2	2	0	7	0	0	0	0	0	0	0	0	0	0	0	0	0	0	0	1	0	0	0	0	0	0	0	135	84	120	90	1	0	0	0	0	0	0	0	3	0	0	0	0	0
42	0	0	2	2	1	2	0	5	0	0	0	0	0	0	0	0	0	0	0	0	0	0	0	0	0	0	0	0	0	0	0	142	90	140	100	0	0	0	0	0	0	1	0	0	0	0	1	0	0
74	0	0	6	2	1	2	0	7	2	0	0	0	0	0	0	0	0	0	0	0	0	0	0	1	1	0	0	0	0	0	0	160	60	160	90	0	0	0	0	0	0	0	0	1	3	0	0	0	0
61	1	1	1	2	1	0	0	0	0	0	0	0	0	0	0	0	0	0	0	0	0	0	0	0	0	0	0	0	0	0	0	127	78	120	80	1	0	0	0	0	0	4	1	0	0	1	1	0	0
46	1	1	6	2	1	2	0	5	0	0	0	0	0	0	0	0	0	0	0	0	0	0	0	0	0	0	0	0	0	0	0	137	84	130	90	0	0	0	0	0	0	0	1	0	0	0	0	0	0
60	1	0	0	0	0	2	0	4	0	0	0	0	0	0	0	0	0	0	0	0	0	0	0	0	0	0	0	1	0	0	0	90	60	130	80	0	0	0	0	0	0	0	1	2	1	0	1	0	0
66	0	0	5	2	1	2	0	5	0	0	0	0	0	0	0	0	0	0	0	0	0	0	0	0	0	0	0	0	0	0	0	147	86	150	90	0	0	0	0	0	0	0	0	4	4	0	1	0	0
58	1	1	5	2	1	0	0	0	0	0	0	0	0	0	0	0	0	0	0	0	0	0	0	0	0	0	0	0	0	0	0	115	71	110	70	0	0	0	0	0	0	1	1	0	0	0	1	0	0
57	1	0	1	2	1	2	0	5	0	0	0	0	0	0	0	0	0	0	0	0	0	0	0	0	0	0	0	0	0	0	0	190	100	200	100	0	0	0	0	0	0	4	1	0	0	0	0	0	0
64	0	0	4	2	1	2	0	7	0	0	0	0	0	0	0	0	0	0	0	0	0	0	0	1	1	0	0	0	0	0	0	130	80	130	80	0	0	0	0	0	0	4	1	0	0	0	0	0	0
70	1	0	6	2	1	0	0	0	0	0	0	0	0	1	0	0	0	0	0	0	0	0	0	1	0	0	0	0	0	0	0	144	81	160	80	0	0	1	0	0	0	0	0	4	0	0	0	1	0
68	0	0	6	2	1	2	0	7	0	0	0	0	0	0	0	0	0	0	0	0	0	0	0	0	0	0	0	0	0	0	0	174	102	180	120	0	0	0	0	0	0	1	0	0	0	0	1	0	0
43	1	0	0	0	0	0	0	0	0	0	0	0	0	0	0	0	0	0	0	0	0	0	0	0	0	0	0	0	0	0	0	130	81	130	80	0	0	0	0	0	0	0	0	2	0	0	1	0	0
63	1	3	4	2	1	0	0	0	0	0	0	0	0	0	0	0	0	0	0	0	0	0	0	0	0	0	1	0	0	0	0	109	67	90	60	0	0	0	0	0	0	0	0	4	0	0	1	0	0
34	1	0	4	2	1	2	0	4	0	0	0	0	0	0	0	0	0	0	0	0	0	0	0	0	0	0	0	0	0	0	0	120	80	140	90	0	0	0	0	0	0	0	1	0	2	0	1	0	0
49	1	1	4	2	1	0	0	0	0	0	0	1	0	0	0	0	0	0	0	0	0	0	0	0	0	0	0	0	0	0	1	140	90	130	80	0	0	0	0	0	0	1	1	0	0	0	0	0	0
50	0	0	6	2	2	2	0	7	0	0	0	0	0	0	0	0	0	0	0	0	0	0	0	1	0	0	0	1	0	0	0	148	84	160	80	0	0	0	0	0	0	1	0	2	1	0	1	0	0
83	1	0	2	2	1	2	0	5	0	0	0	0	0	0	0	0	0	0	0	0	0	0	0	0	0	0	1	0	0	0	0	149	83	140	80	0	0	0	0	0	0	1	1	0	0	0	1	0	0
52	1	0	1	2	1	2	0	1	0	0	0	0	0	0	0	0	0	0	0	0	0	0	0	0	0	0	0	0	0	0	0	142	88	140	100	0	0	0	0	0	0	1	1	0	0	0	1	0	0
61	1	1	6	2	1	0	0	0	0	0	0	0	0	0	0	0	0	0	0	0	0	0	0	0	0	0	0	0	0	0	0	126	77	120	80	0	0	0	0	0	0	0	0	2	1	0	1	0	0
62	1	0	4	2	1	0	0	0	0	0	0	0	0	0	0	0	0	0	0	0	0	0	0	0	0	0	0	0	0	0	0	130	90	170	110	0	0	0	0	0	0	4	2	0	0	0	1	0	0
61	0	0	2	2	1	2	0	7	3	0	0	0	0	0	0	0	0	0	0	0	0	0	0	0	0	0	0	1	0	0	0	166	98	180	110	0	0	0	0	0	0	0	0	4	0	0	1	0	0
71	0	0	4	2	2	2	0	3	0	0	0	0	0	0	0	0	0	0	0	0	0	0	0	0	0	0	0	0	0	0	0	149	87	150	90	0	0	0	0	0	0	1	1	0	0	0	1	0	0
57	1	3	6	2	1	2	0	3	0	0	0	0	0	0	0	0	0	0	0	0	0	0	0	0	0	0	0	0	0	0	0	110	70	90	70	0	0	0	0	0	0	4	2	0	0	0	1	0	0
51	1	1	5	2	1	0	0	0	0	0	0	0	0	0	0	0	0	0	0	0	0	0	0	1	0	0	0	0	0	0	0	150	90	120	80	0	0	0	0	0	0	4	1	0	0	0	1	0	0
52	1	0	0	0	0	0	0	0	0	0	0	0	0	0	0	0	0	0	0	0	0	0	0	0	0	0	0	0	0	0	0	140	90	150	80	0	0	0	0	0	0	4	1	0	0	0	0	0	0
46	0	0	0	0	2	0	1	7	0	0	0	0	0	0	0	0	0	0	0	0	0	0	0	0	0	0	0	0	0	0	0	137	84	139	84	0	0	0	0	0	0	1	1	0	0	0	1	0	0
54	1	0	0	0	2	2	0	4	0	0	0	0	0	0	0	0	0	0	0	0	0	0	0	0	0	0	0	0	0	0	0	113	70	100	60	0	0	0	0	0	0	0	0	4	0	0	1	0	0
79	1	2	0	0	2	3	0	7	3	1	0	0	0	0	0	0	0	0	0	0	0	0	0	0	0	0	1	0	0	0	0	167	95	160	100	0	0	0	0	0	0	1	1	0	0	0	0	0	0
61	1	1	2	2	2	0	0	0	0	0	0	0	0	0	0	0	0	0	0	0	0	0	0	0	0	0	0	0	0	0	0	100	60	100	70	0	0	0	0	0	0	0	0	4	0	0	1	0	0
64	1	0	4	2	0	2	0	5	0	0	0	0	0	0	0	0	0	0	0	0	0	0	0	0	0	0	0	0	0	0	0	133	80	130	80	0	0	0	0	0	0	0	2	0	2	0	0	0	0
70	1	0	6	2	1	0	0	0	0	0	0	0	0	0	0	0	0	0	0	0	0	0	0	0	0	0	0	0	0	0	0	145	80	145	80	0	0	0	0	0	0	1	0	0	0	0	1	0	0
44	1	0	0	0	0	0	0	0	0	0	0	0	0	0	0	0	0	0	0	0	0	0	0	0	0	0	0	0	0	0	0	100	70	120	80	0	0	0	0	0	0	0	0	2	0	0	1	0	0
52	1	0	3	2	1	0	0	0	0	0	0	0	0	0	0	0	0	0	0	0	0	0	0	0	0	0	1	0	0	0	0	129	76	140	70	0	0	0	0	0	0	1	0	0	0	0	1	0	0
67	1	1	0	0	0	3	0	7	0	0	0	0	0	0	0	0	0	0	0	0	0	0	0	0	0	0	0	0	0	0	0	137	82	120	80	0	0	0	0	0	0	0	0	2	1	0	0	0	0
65	1	0	4	2	1	2	0	5	0	0	0	0	0	0	0	0	0	0	0	0	0	0	0	0	0	0	0	0	0	0	0	149	86	150	90	0	0	0	0	0	0	1	1	0	0	0	1	0	0
63	0	0	0	0	2	2	0	2	0	0	0	0	0	0	0	0	0	0	0	0	0	0	0	0	0	0	0	0	0	0	0	142	85	130	90	0	0	0	0	0	0	4	1	0	0	0	1	0	0
56	0	0	6	2	2	3	0	5	0	0	0	0	0	0	0	0	0	0	0	0	0	0	0	0	0	1	0	0	0	0	0	125	77	125	80	1	0	0	0	0	0	4	1	0	0	0	0	0	0
52	1	1	5	2	1	0	0	0	0	0	0	0	0	0	0	0	0	0	0	0	0	0	0	0	0	0	0	0	0	0	0	90	60	90	60	0	0	1	0	0	1	2	1	0	0	0	1	0	0
65	0	0	0	0	2	0	0	0	0	0	0	0	0	0	0	0	0	0	0	0	0	0	0	0	0	0	0	0	0	0	0	117	72	110	70	0	0	0	0	0	0	0	1	1	3	0	1	0	0
80	0	0	2	2	1	2	0	6	0	0	0	0	0	0	0	0	0	0	0	0	0	0	0	0	0	0	0	0	0	0	0	156	88	150	90	0	0	0	0	0	0	1	1	0	0	0	1	0	0
70	0	0	6	3	1	2	0	7	0	1	0	0	0	0	0	0	0	0	0	0	0	0	0	0	0	0	0	0	0	0	0	154	88	150	90	0	0	0	0	0	0	1	1	0	0	0	1	0	0
65	1	3	6	2	1	2	0	7	0	0	0	0	0	0	0	0	0	0	0	0	0	0	0	1	0	0	0	0	0	0	0	151	88	140	90	0	0	0	0	0	0	1	1	0	0	0	1	0	0
63	0	0	1	2	1	0	0	0	3	0	0	0	0	1	0	0	0	0	0	0	0	0	0	0	0	0	0	0	0	0	0	160	90	120	80	0	0	1	0	0	0	1	1	0	0	0	0	1	0
65	1	1	0	0	2	0	0	0	0	0	0	0	0	0	0	1	0	0	0	0	0	0	0	0	0	0	0	0	0	1	0	60	40	73	47	0	0	0	0	0	0	4	3	0	0	0	1	0	0
81	0	2	0	0	0	2	0	7	0	0	0	0	0	0	0	0	0	0	0	0	0	0	0	0	0	0	0	0	0	0	0	210	100	170	90	0	0	0	0	0	0	1	1	0	0	0	1	0	0
73	0	0	0	0	0	2	0	5	0	0	0	0	0	0	0	0	0	0	0	0	0	0	0	0	1	0	0	0	0	0	0	160	93	160	100	0	0	0	0	0	0	2	1	0	0	0	0	0	0
62	1	1	6	2	1	0	0	0	0	0	0	0	0	0	0	0	0	0	0	0	0	0	0	1	0	0	0	0	0	0	0	128	77	120	80	0	0	0	0	0	0	0	0	2	0	0	1	0	0
61	0	0	0	0	0	0	1	4	0	0	0	0	0	0	0	0	0	0	0	0	0	0	0	0	0	0	0	0	0	0	0	129	79	120	80	0	0	0	0	0	0	0	0	1	1	0	1	0	0
42	1	0	0	0	2	0	0	0	0	0	0	0	0	0	0	0	0	0	0	0	0	0	0	0	0	0	0	0	0	0	0	110	70	90	60	0	0	0	0	0	0	0	0	1	0	0	1	0	0
69	1	0	0	0	2	2	0	7	0	0	0	0	0	0	0	0	0	0	0	0	0	0	0	0	0	0	1	0	0	0	0	160	100	155	100	0	0	0	0	0	0	4	3	0	0	0	1	0	0
63	0	0	4	2	1	3	0	7	0	0	0	0	0	0	0	0	0	0	0	0	0	0	0	0	0	0	0	0	0	0	0	177	98	200	100	0	0	0	0	0	0	1	1	0	0	0	1	0	0
62	0	1	2	2	1	2	0	7	4	1	0	0	0	0	0	0	0	0	0	0	0	0	0	0	0	0	0	1	0	0	0	240	160	140	90	0	0	1	0	0	0	3	2	0	0	0	0	0	0
47	1	1	4	2	1	2	0	4	0	0	0	0	0	0	0	0	0	0	0	0	0	0	0	0	0	0	0	0	0	0	0	140	90	140	90	0	0	0	0	0	0	0	0	4	0	0	1	0	0
42	1	1	0	0	2	0	0	0	0	0	0	0	0	0	0	0	0	0	0	0	0	0	0	0	0	0	0	0	0	0	0	140	80	140	95	0	0	0	0	0	0	1	1	0	0	0	1	0	0
65	1	0	4	2	1	0	0	0	0	0	0	0	0	0	0	0	0	0	0	0	0	0	0	0	0	0	0	0	0	0	1	100	60	110	60	0	0	0	0	0	0	2	1	0	0	0	0	0	0
55	1	1	2	2	1	0	0	0	0	0	0	0	0	0	0	0	0	0	0	0	0	0	0	0	0	0	0	0	0	0	0	120	70	130	80	0	0	0	0	0	0	0	0	1	0	0	0	0	0
63	1	1	1	2	1	3	0	6	0	0	0	0	0	0	0	0	0	0	0	0	0	0	0	0	0	0	0	0	0	0	0	168	96	180	100	0	0	0	0	0	0	1	1	1	0	0	1	0	0
60	1	0	0	0	0	2	0	3	0	0	0	0	0	0	0	0	0	0	0	0	0	0	0	0	0	0	0	0	0	0	0	130	90	140	90	0	0	0	0	0	0	0	0	4	0	0	1	0	0
72	1	0	3	2	1	0	1	5	0	0	0	0	0	0	0	0	0	0	0	0	0	0	0	0	0	0	0	0	0	0	0	188	102	220	110	0	0	0	0	0	0	0	1	4	0	0	1	0	0
72	0	0	6	2	1	3	0	7	0	0	0	0	0	0	0	0	0	0	0	0	0	0	0	1	0	0	0	0	0	0	1	143	85	130	90	0	0	0	0	0	0	1	1	0	0	0	0	0	0
77	0	0	0	0	2	0	0	0	0	0	0	0	0	0	0	0	0	0	0	0	0	0	0	0	0	0	1	0	0	0	0	128	77	110	80	0	0	0	0	0	0	4	0	3	0	0	1	0	0
63	1	1	1	2	1	2	0	4	0	0	0	0	0	0	0	0	0	0	0	0	0	0	0	0	0	0	0	0	0	0	0	150	90	160	100	0	0	0	0	0	0	1	1	1	0	0	1	0	0
42	1	1	1	2	2	0	0	0	0	0	0	0	0	0	0	0	0	0	0	0	0	0	0	0	0	0	0	0	0	0	0	140	90	130	80	0	0	0	0	0	0	4	1	1	0	0	0	0	0
51	1	3	6	2	1	0	0	0	0	0	0	0	1	0	0	0	0	0	0	0	0	0	0	0	0	0	0	0	0	0	0	126	77	123	80	0	0	0	0	0	0	4	2	1	0	0	1	0	0
75	1	1	5	2	1	0	0	0	0	0	0	0	0	0	0	0	0	0	0	0	0	0	0	0	0	0	0	0	0	0	0	153	86	160	90	0	0	0	0	0	0	4	1	1	0	0	1	0	0
71	1	2	6	2	1	0	0	0	0	0	0	0	0	0	0	0	0	0	0	0	0	0	0	0	0	0	0	0	0	0	0	134	80	130	90	0	0	0	0	0	0	1	1	1	0	0	0	0	0
60	1	1	2	2	2	0	0	0	0	0	0	0	0	0	0	0	0	0	0	0	0	0	0	0	0	0	0	0	0	0	0	170	98	190	110	0	0	0	0	0	0	1	1	1	0	0	1	0	0
57	1	1	6	2	1	0	0	0	0	0	0	0	0	0	0	0	0	0	0	0	0	0	0	0	0	0	0	0	0	0	0	149	89	160	100	0	0	0	0	0	0	0	0	1	0	0	1	0	0
52	1	0	0	0	2	0	0	0	0	0	0	0	0	0	0	0	0	0	0	0	0	0	0	0	0	0	1	0	0	0	0	100	70	100	70	0	0	0	0	0	0	4	1	0	0	0	1	0	0
59	0	0	5	2	2	2	0	1	0	0	0	0	0	0	0	0	0	0	0	0	0	0	0	0	0	0	0	0	0	0	0	141	84	150	90	0	0	0	0	0	0	1	0	0	0	0	0	0	0
67	0	0	3	2	1	2	0	4	0	0	0	0	0	0	0	0	0	0	0	0	0	0	0	1	0	0	0	0	0	0	0	159	92	160	100	0	0	0	0	0	0	4	2	0	0	0	0	0	0
78	0	0	4	2	1	2	0	5	0	0	0	0	0	0	0	0	0	0	0	0	0	0	0	0	0	0	0	0	1	0	0	170	80	160	90	0	0	0	0	0	0	0	1	1	0	0	1	0	0
49	1	2	6	2	2	2	0	5	0	0	0	0	0	0	0	0	0	0	0	0	0	0	0	0	0	0	0	0	0	0	0	145	100	120	80	1	0	0	0	0	0	4	2	0	0	0	1	0	0
62	1	0	6	2	1	2	0	4	0	0	0	0	0	0	0	0	0	0	0	0	0	0	0	0	0	0	1	0	0	0	0	100	60	180	120	0	0	0	0	0	0	1	1	4	0	0	1	0	0
52	1	2	3	2	1	0	0	0	0	0	0	0	0	0	0	0	0	0	0	0	0	0	0	0	0	0	0	0	0	0	0	130	90	120	80	0	0	0	0	0	0	0	1	0	2	0	1	0	0
59	0	0	0	0	0	2	0	7	0	0	0	0	0	0	0	0	0	0	0	0	0	0	0	1	1	0	0	0	0	0	0	160	110	157	102	0	0	0	0	0	0	0	1	0	1	0	0	0	0
70	0	0	5	2	1	2	0	7	0	0	0	0	0	0	0	0	0	0	0	0	0	0	0	0	0	1	0	0	0	0	0	149	86	150	90	0	0	0	0	0	0	4	1	0	1	0	0	0	0
66	1	0	5	2	1	0	0	0	0	0	0	0	0	1	0	0	0	0	0	0	0	0	0	0	0	0	0	0	0	0	0	131	78	128	81	0	0	1	0	0	0	4	3	0	0	0	0	1	0
60	1	0	0	0	0	3	0	6	0	0	0	0	0	0	0	0	0	0	0	0	0	0	0	0	0	0	0	0	0	0	0	126	82	120	90	0	0	0	0	0	0	4	3	0	0	0	0	0	0
69	0	2	4	2	2	2	0	6	0	0	0	0	0	0	0	0	0	0	0	0	0	0	0	0	0	0	0	0	0	0	0	190	100	150	90	0	0	0	0	0	0	1	0	0	0	0	0	0	0
50	1	0	0	0	0	2	0	1	0	0	0	0	0	0	0	0	0	0	0	0	0	0	0	0	0	0	0	0	0	0	0	130	90	150	105	0	0	0	0	0	0	1	1	0	0	0	1	0	0
59	1	2	4	2	2	2	0	6	3	0	0	0	0	0	0	0	0	0	0	0	0	0	0	1	0	0	0	1	0	0	0	120	85	100	70	1	0	0	0	0	0	0	0	1	0	0	0	0	0
50	1	0	5	2	1	2	0	6	0	0	0	0	0	0	0	0	0	0	0	0	0	0	0	0	0	0	0	0	0	0	0	140	90	120	80	0	0	0	0	0	0	0	0	4	0	0	1	0	0
34	1	1	5	2	1	2	0	4	0	0	0	0	0	0	0	0	0	0	0	0	0	0	0	0	0	0	0	0	0	0	0	110	70	90	60	0	0	0	0	0	0	0	0	2	0	0	1	0	0
59	1	0	0	0	0	0	0	0	0	0	0	0	0	0	0	0	0	0	0	0	0	0	0	0	0	0	0	0	0	0	0	120	80	115	80	0	0	0	0	0	0	4	1	0	0	0	0	0	0
84	0	1	0	0	0	2	0	7	0	0	0	0	0	0	0	0	0	0	0	0	0	0	0	0	0	0	0	0	0	0	0	160	90	130	80	0	0	0	0	0	0	4	1	0	0	0	1	0	0
74	0	0	3	3	1	2	0	5	1	0	0	0	0	0	0	0	0	0	0	0	0	0	0	0	0	0	0	0	0	0	0	160	100	140	70	0	0	0	0	0	0	0	0	2	0	0	0	0	0
49	1	0	0	0	0	0	0	0	0	0	0	0	0	0	0	0	0	0	0	0	0	0	0	0	0	0	0	0	0	0	0	130	90	140	90	0	0	0	0	0	0	2	2	2	0	0	0	0	0
52	0	2	3	2	1	0	0	0	4	0	0	0	0	0	0	0	0	0	0	0	0	0	0	0	0	0	1	0	0	0	0	106	67	100	60	0	0	0	0	0	0	0	0	3	0	0	1	0	0
74	0	1	4	2	1	2	0	3	0	0	0	0	0	0	0	0	0	0	0	0	0	0	0	0	0	0	0	0	0	0	0	150	80	120	80	1	0	0	0	0	0	1	1	0	0	0	1	0	0
63	1	0	0	0	0	2	0	5	0	0	0	0	0	0	0	0	0	0	0	0	0	0	0	0	0	0	0	0	0	0	0	175	98	190	100	0	0	0	0	0	0	0	1	0	0	0	1	0	0
64	1	0	6	2	1	3	0	6	0	0	0	0	0	0	0	0	0	0	0	0	0	0	0	0	0	0	0	0	0	0	0	170	100	160	100	0	0	0	0	0	0	4	0	0	0	0	1	0	0
68	0	1	2	2	1	2	0	1	0	0	0	0	0	0	0	0	0	0	0	0	0	0	0	0	0	0	0	0	0	0	0	151	86	150	90	0	0	0	0	0	0	4	1	0	0	0	1	0	0
43	1	1	1	2	1	0	0	0	0	0	0	0	0	0	0	0	0	0	0	0	0	0	0	0	0	0	0	0	0	0	0	125	79	130	80	0	0	0	0	0	0	4	1	0	0	0	1	0	0
63	1	2	6	2	1	2	0	7	0	0	0	0	0	1	0	0	0	0	0	0	0	0	0	0	0	0	0	0	0	0	0	130	80	120	70	0	0	1	0	0	0	0	0	2	1	0	0	1	0
63	1	1	6	2	1	3	0	7	0	0	0	0	0	0	0	0	0	0	0	0	0	0	0	0	0	0	0	0	0	0	0	120	80	120	80	0	0	0	0	0	0	4	1	0	0	0	1	0	0
52	1	0	0	0	0	2	0	1	0	0	0	0	0	0	0	0	0	0	0	0	0	0	0	0	0	0	1	0	0	0	0	144	86	140	90	0	0	0	0	0	0	0	0	2	1	0	1	0	0
48	1	0	1	2	0	2	0	7	0	0	0	0	0	0	0	0	0	0	0	0	0	0	0	0	0	0	0	0	0	0	0	132	81	130	80	0	0	0	0	0	0	4	0	0	0	0	1	0	0
52	1	1	3	2	1	0	0	0	0	0	0	0	0	0	0	0	0	0	0	0	0	0	0	0	0	0	0	0	0	0	0	125	78	130	80	0	0	0	0	0	0	1	0	0	0	0	1	0	0
56	1	0	0	0	2	2	0	4	0	0	0	0	0	0	0	0	0	0	0	0	0	0	0	0	0	0	0	0	0	0	0	112	69	90	60	0	0	0	0	0	0	4	3	0	0	0	0	0	0
61	1	1	1	2	1	0	0	0	0	0	0	0	0	0	0	0	0	0	0	0	0	0	0	0	0	0	0	0	0	0	0	120	70	140	80	0	0	0	0	0	0	1	1	1	0	0	0	0	0
63	1	0	6	2	1	2	0	5	0	0	0	0	0	0	0	0	0	0	0	0	0	0	0	1	0	0	0	0	0	0	0	120	70	160	85	0	0	0	0	0	0	1	1	0	0	0	1	0	0
55	1	0	0	0	2	2	0	4	0	0	0	0	0	0	0	0	0	0	0	0	0	0	0	0	0	0	0	0	0	0	0	155	110	120	90	0	0	0	0	0	0	0	0	4	3	0	1	0	0
44	1	0	0	0	0	0	0	0	0	0	0	0	0	0	0	0	0	0	0	0	0	0	0	0	0	0	0	0	0	0	0	130	80	120	80	0	0	0	0	0	0	0	1	2	3	0	1	0	0
63	1	2	6	2	1	3	0	6	0	0	0	0	0	0	0	0	0	0	0	0	0	0	0	0	0	0	0	0	0	0	0	170	60	100	60	0	0	0	0	0	0	1	1	0	0	0	1	0	0
53	1	0	0	0	2	2	0	5	0	0	0	0	0	0	0	0	0	0	0	0	0	0	0	0	0	0	0	0	0	0	0	132	81	130	80	0	0	0	0	0	0	0	1	0	2	0	1	0	0
83	0	0	1	2	1	3	0	7	0	0	0	0	0	0	0	0	0	0	0	0	0	0	0	0	0	0	1	0	0	0	0	145	82	130	80	0	0	1	0	0	0	0	0	4	1	0	0	1	0
56	1	0	6	2	1	0	0	0	0	0	0	0	0	0	0	0	0	0	0	0	0	0	0	0	0	0	0	1	0	0	0	117	71	115	70	0	0	0	0	0	0	0	1	3	0	0	0	0	0
78	0	0	0	0	0	3	0	7	0	0	0	0	0	0	0	0	0	0	0	0	0	0	0	0	0	0	0	0	0	0	0	140	80	130	90	0	0	0	0	0	0	1	1	0	0	0	1	0	0
62	1	1	6	2	1	0	0	0	0	0	0	0	0	0	0	0	0	0	0	0	0	0	0	0	0	0	0	1	0	0	0	128	74	120	70	0	0	0	0	0	0	0	1	1	1	0	1	0	0
71	0	0	0	0	0	3	0	7	0	0	0	0	0	0	0	0	0	0	0	0	0	0	0	0	0	0	0	0	0	0	0	173	97	180	100	0	0	0	0	0	0	1	1	0	0	0	1	0	0
66	1	1	1	2	1	0	0	0	0	0	0	0	0	0	0	0	0	0	0	0	0	0	0	0	0	0	0	1	0	0	0	133	79	120	80	0	0	0	0	0	0	2	1	0	0	0	1	0	0
40	1	0	0	0	0	0	0	0	0	0	0	0	0	0	0	0	0	0	0	0	0	0	0	0	0	0	0	0	0	0	0	119	77	120	80	0	0	0	0	0	0	0	0	2	1	0	1	0	0
63	1	0	3	2	1	0	0	0	0	0	0	0	0	0	0	0	0	0	0	0	0	0	0	0	0	0	0	0	0	0	0	140	80	130	80	0	0	0	0	0	0	0	1	1	0	0	1	0	0
50	1	0	2	2	1	2	0	1	0	0	0	0	0	0	0	0	0	0	0	0	0	0	0	0	0	0	0	0	0	0	0	117	73	110	70	0	0	0	0	0	0	0	0	1	0	0	1	0	0
76	1	0	0	0	0	0	0	0	0	0	0	0	0	0	0	0	0	0	0	0	0	0	0	1	0	0	0	0	0	0	0	145	88	140	100	0	0	0	0	0	0	0	0	2	0	0	0	0	1
42	1	0	0	0	0	0	0	0	0	0	0	0	0	0	0	0	0	0	0	0	0	0	0	0	0	0	0	0	0	0	0	90	60	90	60	0	0	0	0	0	0	4	1	0	0	0	1	0	0
78	0	1	4	2	2	2	0	3	0	0	0	0	0	0	0	0	0	0	1	0	0	0	0	0	0	0	0	0	0	0	0	130	80	110	70	0	0	0	0	0	0	1	1	1	0	0	1	0	0
75	0	1	6	2	1	3	0	7	0	0	0	0	0	0	0	0	0	0	0	0	0	0	0	1	0	0	0	0	0	0	0	130	80	150	90	0	0	0	0	0	0	4	3	0	0	0	0	0	0
42	1	0	0	0	0	0	0	0	0	0	0	0	0	0	0	0	0	0	0	0	0	0	0	0	0	0	0	0	0	0	0	170	70	130	80	0	0	0	0	0	0	0	0	1	2	0	1	0	0
50	1	3	6	2	1	2	0	5	0	0	0	0	0	0	0	0	0	0	0	0	0	0	0	0	0	0	1	0	0	0	0	130	80	130	80	0	0	0	0	0	0	1	1	0	0	0	1	0	0
69	0	1	6	2	1	3	0	6	0	0	0	0	0	0	0	0	0	0	0	0	0	0	0	0	0	0	0	0	0	0	0	120	80	160	100	0	0	0	0	0	0	0	0	4	1	0	0	0	0
33	1	0	0	0	2	0	0	0	0	0	0	0	0	0	0	0	0	0	0	0	0	0	0	0	0	0	0	0	0	0	0	130	90	150	90	0	0	0	0	0	0	4	1	0	0	0	1	0	0
53	1	0	0	0	2	0	0	0	0	0	0	0	0	0	0	0	0	0	0	0	0	0	0	0	0	0	1	0	0	0	0	134	83	140	90	0	0	0	0	0	0	4	3	0	0	0	0	0	0
54	1	0	0	0	0	0	0	0	0	0	0	0	0	0	0	0	0	0	0	0	0	0	0	0	0	0	0	0	0	0	0	110	73	110	80	0	0	0	0	0	0	0	2	4	4	0	0	0	0
49	1	1	6	2	2	0	0	0	0	0	0	0	0	0	0	0	0	0	0	0	0	0	0	0	0	0	0	0	0	0	0	125	78	120	80	0	0	0	0	0	0	2	1	0	0	0	1	0	0
57	1	1	1	2	1	2	0	1	0	0	0	0	0	0	0	0	0	0	0	0	0	0	0	0	0	0	0	0	0	0	0	120	70	120	80	0	0	0	0	0	0	0	0	4	1	0	0	0	0
60	0	0	6	2	1	0	0	0	0	0	0	0	0	0	0	0	0	0	0	0	0	0	0	0	0	0	0	0	0	0	0	106	66	90	60	0	0	0	0	0	0	0	0	3	1	0	1	0	0
71	1	0	0	0	0	0	0	0	0	0	0	0	0	0	0	0	0	0	0	0	0	0	0	0	0	0	0	0	0	0	0	136	80	130	80	0	0	0	0	0	0	0	1	1	0	0	1	0	0
53	1	1	2	2	1	2	0	6	0	0	0	0	0	0	0	0	0	0	0	0	0	0	0	0	0	0	0	0	0	0	0	160	94	160	100	0	0	0	0	0	0	3	1	0	0	0	1	0	0
49	1	0	0	0	0	2	0	7	0	0	0	0	0	0	0	0	0	0	0	0	0	0	0	0	0	0	0	0	0	0	0	160	90	110	70	0	0	0	0	0	0	4	1	0	0	0	1	0	0
64	0	0	0	0	0	2	0	1	0	0	0	0	0	0	0	0	0	0	0	0	0	0	0	0	0	0	0	0	0	0	0	135	81	133	82	0	0	0	0	0	0	0	1	4	3	0	1	0	0
67	0	1	1	2	1	3	0	8	0	0	0	0	0	0	0	0	0	0	0	0	0	0	0	1	0	0	0	0	0	0	0	191	104	210	110	0	0	0	0	0	0	0	1	4	0	0	0	0	0
72	0	0	1	2	1	0	0	0	1	0	0	0	0	0	0	0	0	0	0	0	0	0	0	0	0	0	1	0	0	0	0	169	97	180	110	0	0	0	0	0	0	4	1	1	0	0	1	0	0
67	0	0	1	2	1	0	0	7	0	0	0	0	0	0	0	0	0	0	0	0	0	0	0	0	0	0	0	0	0	0	0	140	90	140	90	0	0	0	0	0	0	4	1	0	0	0	1	0	0
63	1	1	2	2	1	0	0	0	0	0	0	0	0	0	0	0	0	0	0	0	0	0	0	0	0	0	0	0	0	0	0	127	75	120	70	0	0	0	0	0	0	0	0	2	0	0	1	0	0
56	1	1	6	2	1	2	0	6	0	0	0	0	0	0	0	0	0	0	1	0	0	0	0	0	0	0	0	0	0	0	0	200	120	200	100	0	0	0	0	0	0	1	1	0	0	0	1	0	0
65	1	0	5	2	1	0	0	0	0	0	0	0	1	0	0	0	0	0	0	0	0	0	0	0	0	0	0	0	0	0	0	154	93	160	110	0	0	0	0	0	0	4	1	0	0	0	0	0	0
42	1	0	0	0	0	0	0	0	0	0	0	0	0	0	0	0	0	0	0	0	0	0	0	0	0	0	0	0	0	0	0	134	84	140	90	0	0	0	0	0	0	4	3	0	0	0	1	0	0
44	1	0	0	0	0	0	0	0	0	0	0	0	0	0	0	0	0	0	0	0	0	0	0	0	0	0	0	0	0	0	0	130	90	160	70	0	0	0	0	0	0	4	1	0	0	0	1	0	0
66	0	1	0	0	2	2	0	6	0	0	0	0	0	0	0	0	0	0	0	0	0	0	0	0	0	0	0	0	0	0	0	130	80	120	80	0	0	0	0	0	0	0	0	1	0	0	1	0	0
51	1	0	0	0	2	2	0	7	0	0	0	0	0	0	0	0	0	0	0	0	0	0	0	0	0	0	0	0	0	0	0	130	80	160	100	0	0	1	0	0	0	4	1	0	0	1	0	1	0
62	0	0	0	0	0	0	0	0	0	0	0	0	0	0	0	0	0	0	0	0	0	0	0	0	0	0	0	0	0	0	0	124	74	115	70	0	0	0	0	0	0	4	4	2	0	0	1	0	0
68	1	1	2	2	1	2	0	7	0	0	0	0	0	0	0	0	0	0	0	0	0	0	0	0	0	0	0	0	0	0	0	140	90	130	80	0	0	0	0	0	0	0	0	1	0	0	1	0	0
54	1	2	2	3	1	0	0	0	3	0	0	0	0	0	0	0	0	0	0	0	0	0	0	0	0	0	0	0	0	0	0	113	71	110	70	1	0	0	0	0	0	4	1	0	0	0	1	0	0
37	1	0	0	0	0	0	0	0	0	0	0	0	0	0	0	0	0	0	0	0	0	0	0	0	0	0	0	0	0	0	0	112	76	120	80	0	0	0	0	0	0	0	2	4	2	0	1	0	0
67	0	0	6	2	1	3	0	7	0	0	0	0	0	0	0	0	0	0	0	0	0	0	0	1	0	0	0	0	0	0	0	137	81	120	80	0	0	0	0	0	0	0	0	4	0	0	1	0	0
46	1	0	0	0	0	3	0	6	0	0	0	0	0	0	0	0	0	0	0	0	0	0	0	0	0	0	0	0	0	0	0	150	80	180	120	0	0	0	0	0	0	0	0	2	1	0	1	0	0
54	1	0	0	0	0	0	0	0	0	0	0	0	0	0	0	0	0	0	0	0	0	0	0	0	0	0	0	0	0	0	0	140	90	140	100	0	0	0	0	0	0	0	0	4	0	0	1	0	0
51	1	0	0	0	2	0	0	0	0	0	0	0	0	0	0	0	0	0	0	0	0	0	0	0	0	0	0	0	0	0	0	130	80	120	80	0	0	0	0	0	0	0	1	1	1	0	1	0	0
69	0	0	6	2	1	2	0	7	0	0	0	0	0	0	0	0	0	0	0	0	0	0	0	0	0	0	0	0	0	0	0	140	80	140	80	0	0	0	0	0	0	0	1	3	1	0	1	0	0
72	0	2	6	3	1	2	0	7	0	0	0	0	0	0	0	0	0	0	0	0	0	0	0	1	0	0	0	0	0	0	0	143	82	120	80	0	0	0	0	0	0	3	1	0	0	0	0	0	0
57	1	2	6	2	1	2	0	7	3	0	0	0	0	0	0	0	0	0	0	0	0	0	0	0	0	0	1	0	0	0	0	110	70	160	90	0	0	0	0	0	0	0	1	0	1	0	1	0	0
49	1	0	6	2	2	0	0	0	0	0	0	0	0	0	0	0	0	0	0	0	0	0	0	0	0	0	0	0	0	0	0	145	88	160	100	0	0	0	0	0	0	4	3	0	0	0	0	0	0
77	0	0	0	0	0	2	0	7	0	0	0	0	0	0	0	0	0	0	0	0	0	0	0	1	0	0	0	0	0	0	0	149	84	130	80	0	0	0	0	0	0	0	0	2	0	0	0	0	0
45	1	1	6	2	1	2	0	5	0	0	0	0	0	0	0	0	0	0	0	0	0	0	0	0	0	0	0	0	0	0	0	150	80	160	100	0	0	0	0	0	0	4	4	0	0	0	1	0	0
37	1	1	0	0	2	0	0	0	0	0	0	0	0	0	0	0	0	0	0	0	0	0	0	0	0	0	0	0	0	0	0	118	78	120	80	0	0	0	0	0	0	4	3	0	0	0	1	0	0
73	1	0	6	2	1	3	0	7	0	0	0	0	0	0	0	0	0	0	0	0	0	0	0	0	0	0	0	1	0	0	0	174	96	180	100	0	0	0	0	0	0	4	2	0	0	0	0	0	0
74	1	1	6	2	2	2	0	1	0	0	0	0	0	0	0	0	0	0	0	0	0	0	0	0	0	0	0	0	0	0	0	138	79	120	80	0	0	0	0	0	0	1	1	0	0	0	1	0	0
60	0	0	0	0	0	0	0	0	0	0	0	0	0	0	0	0	0	0	0	0	0	0	0	0	0	0	0	0	0	0	0	129	78	120	80	0	0	0	0	0	0	0	4	0	1	0	1	0	0
52	1	0	2	2	2	2	0	4	0	0	0	0	0	0	0	0	0	0	0	0	0	0	0	0	0	0	0	0	0	0	0	159	97	160	110	0	0	0	0	0	0	2	1	0	0	0	1	0	0
68	1	1	2	2	2	0	0	0	0	0	0	0	0	0	0	0	0	0	0	0	0	0	0	0	0	0	0	0	0	0	0	132	80	120	85	0	0	0	0	0	0	4	0	0	0	0	1	0	0
66	1	1	1	2	1	2	0	7	0	0	0	0	0	0	0	0	0	0	0	0	0	0	0	0	0	0	0	0	0	0	0	141	83	140	80	0	0	0	0	0	0	1	1	0	0	0	0	0	0
55	1	0	0	0	2	2	0	2	0	0	0	0	0	0	0	0	0	0	0	0	0	0	0	0	0	0	0	0	0	0	0	170	100	160	90	0	0	0	0	0	0	4	2	0	0	0	0	0	0
59	0	0	0	0	0	0	0	0	0	0	0	0	0	0	0	0	0	0	0	0	0	0	0	0	0	0	0	1	0	0	0	120	70	130	80	0	0	0	0	0	0	1	3	0	0	0	1	0	0
62	0	0	0	0	0	3	0	7	0	0	0	0	0	0	0	0	0	0	0	0	0	0	0	1	0	0	0	0	0	0	0	161	92	160	90	0	0	0	0	0	0	0	0	3	0	0	1	0	0
43	1	0	0	0	2	2	0	7	0	0	0	0	0	0	0	0	0	0	0	0	0	0	0	0	0	0	1	0	0	0	0	139	89	130	100	0	0	0	0	0	0	0	0	3	3	0	0	0	0
44	1	1	3	2	2	2	0	7	0	0	0	0	0	0	0	0	0	0	0	0	0	0	0	0	0	0	0	0	0	0	0	135	82	140	80	0	0	0	0	0	0	0	0	2	0	0	0	0	0
50	1	0	0	0	0	0	0	0	0	0	0	0	0	0	0	0	0	0	0	0	0	0	0	0	0	0	0	0	0	0	0	140	90	130	80	0	0	0	0	0	0	0	0	1	4	0	1	0	0
62	1	1	1	2	1	2	0	2	0	0	0	0	0	0	0	0	1	0	0	0	0	0	0	0	0	0	0	0	0	0	0	140	90	137	87	0	0	0	0	0	0	0	1	1	0	0	1	0	0
70	0	0	6	2	2	2	0	7	3	0	0	0	0	0	0	0	0	0	0	0	0	0	1	0	0	0	1	0	0	0	0	149	85	146	86	0	0	0	0	0	0	1	1	0	0	0	0	0	0
38	1	1	6	2	2	2	0	4	0	0	0	0	0	0	0	0	0	0	0	0	0	0	0	0	0	0	0	0	0	0	0	131	82	136	86	0	0	0	0	0	0	1	1	0	0	0	1	0	0
78	1	0	4	2	2	2	0	4	0	0	0	0	0	0	0	0	0	0	0	0	0	0	0	0	0	0	1	0	0	0	0	137	83	120	90	0	0	0	0	0	0	1	1	0	0	0	1	0	0
51	1	0	0	0	2	0	1	4	0	0	0	0	0	0	0	0	0	0	0	0	0	0	0	0	0	0	0	0	0	0	1	141	83	140	80	0	0	0	0	0	0	4	3	0	0	0	1	0	0
78	0	0	6	2	2	0	0	0	0	0	0	0	0	0	0	0	0	0	0	0	0	0	0	0	0	0	0	0	1	0	0	118	67	100	60	0	0	0	0	0	0	0	1	0	1	0	1	0	0
66	0	0	3	2	1	0	0	0	0	0	0	0	0	0	0	0	0	0	0	0	0	0	0	0	0	0	0	0	0	0	0	150	90	150	90	0	0	0	0	0	0	4	1	0	0	0	0	0	0
65	1	0	1	2	1	2	0	4	0	0	0	0	0	0	0	0	0	0	0	0	0	0	0	0	0	0	1	0	0	0	0	147	86	144	89	0	0	0	0	0	0	1	0	1	0	0	1	0	0
52	1	0	1	2	1	2	0	6	0	0	0	0	0	0	0	0	0	0	0	0	0	0	0	0	0	0	0	0	0	0	0	120	70	170	100	0	0	0	0	0	0	0	0	4	1	0	1	0	0
75	0	2	1	2	2	2	0	7	0	0	0	0	0	0	0	0	0	0	0	0	0	0	0	1	0	0	0	0	0	0	0	163	91	160	90	0	0	0	0	0	0	4	1	0	0	0	1	0	0
43	1	0	0	0	0	2	0	7	0	0	0	0	0	0	0	0	0	0	0	0	0	0	0	0	0	0	0	0	0	0	0	130	80	130	90	0	0	0	0	0	0	4	3	0	0	0	0	0	0
70	1	1	1	2	2	0	0	0	0	0	0	0	0	0	0	0	0	0	0	0	0	0	0	0	0	0	1	0	0	0	0	160	80	150	80	0	0	0	0	0	0	1	1	0	0	0	1	0	0
83	0	0	4	2	2	2	0	5	0	0	0	0	0	0	0	0	0	0	0	0	0	0	0	1	0	0	0	0	0	0	0	143	81	130	80	0	0	0	0	0	0	0	0	1	1	0	1	0	0
70	0	0	6	2	1	2	0	7	0	0	0	0	0	0	0	0	0	0	0	0	0	0	0	0	0	0	0	0	0	0	0	170	95	180	100	0	0	0	0	0	0	4	3	0	0	0	1	0	0
64	1	0	0	0	2	2	0	5	0	0	0	0	0	0	0	0	0	0	0	0	0	0	0	0	0	0	0	0	0	0	0	152	89	150	90	0	0	0	0	0	0	1	1	0	0	0	1	0	0
51	1	0	1	2	1	0	0	0	0	0	0	0	0	0	0	0	0	0	0	0	0	0	0	0	0	0	0	0	0	0	0	128	79	128	82	0	0	0	0	0	0	1	1	0	0	0	1	0	0
52	1	0	3	2	1	2	0	4	0	0	0	0	0	0	0	0	0	0	0	0	0	0	0	0	0	0	0	0	0	0	0	130	90	120	80	0	0	0	0	0	0	0	0	4	3	0	0	0	0
80	0	0	6	2	1	2	0	7	0	0	0	0	0	0	0	0	0	0	0	0	0	0	0	0	0	0	0	0	0	0	0	172	95	170	100	0	0	0	0	0	0	0	0	2	1	0	1	0	0
67	0	0	0	0	0	2	0	4	0	0	0	0	0	0	0	0	0	0	0	0	0	0	0	0	0	0	0	0	0	0	0	90	60	140	100	0	0	0	0	0	0	4	2	0	0	0	0	0	0
66	0	2	0	0	0	2	0	7	0	0	1	0	0	0	0	0	0	0	0	0	0	0	0	1	0	0	1	0	0	0	0	140	90	140	100	1	0	0	0	0	0	1	1	0	0	0	1	0	0
69	0	0	0	0	0	2	0	7	0	0	0	0	0	0	0	0	0	0	0	0	0	0	0	0	0	1	0	0	0	0	0	140	80	160	100	1	0	0	0	0	0	4	1	0	0	0	0	0	0
71	1	1	1	2	1	0	0	0	0	0	0	0	0	0	0	0	0	0	0	0	0	0	0	0	0	0	1	0	0	0	0	140	90	130	100	1	0	0	0	0	0	0	0	3	0	0	0	0	0
56	1	0	5	2	1	2	0	7	0	0	0	0	0	0	0	0	0	0	0	0	0	0	0	0	0	0	0	0	0	0	0	161	97	160	110	0	0	0	0	0	0	1	0	0	0	0	1	0	0
41	1	0	2	2	1	0	0	0	0	0	0	0	0	0	0	0	0	0	0	0	0	0	0	0	0	0	0	0	0	0	0	110	80	110	70	0	0	0	0	0	0	0	1	3	3	0	1	0	0
57	1	0	5	2	1	0	0	0	0	0	0	0	0	0	0	0	0	0	0	0	0	0	0	0	0	0	0	0	0	0	0	124	77	120	80	0	0	0	0	0	0	1	0	1	1	0	1	0	0
61	0	0	3	2	2	2	0	7	0	0	0	0	0	0	0	0	0	0	0	0	0	0	0	0	0	0	0	0	0	0	0	150	90	230	120	0	0	0	0	0	0	0	1	1	1	0	1	0	0
44	1	0	0	0	0	2	0	7	0	0	0	0	0	0	0	0	0	0	0	0	0	0	0	0	0	0	0	0	0	0	0	134	83	130	80	0	0	0	0	0	0	0	0	1	1	0	0	0	0
38	1	1	0	0	0	0	0	0	0	0	0	0	0	0	0	0	0	0	0	0	0	0	0	1	0	0	0	0	0	0	0	111	72	110	70	0	0	0	0	0	0	1	1	0	0	0	1	0	0
54	1	0	0	0	0	2	0	7	0	0	0	0	0	0	0	0	0	0	0	0	0	0	0	0	0	1	0	0	0	0	0	136	82	135	81	0	0	0	0	0	0	0	0	1	1	0	1	0	0
45	1	1	5	2	1	2	0	1	0	0	0	0	0	0	0	0	0	0	0	0	0	0	0	0	0	0	0	0	0	0	0	132	83	130	90	0	0	0	0	0	0	1	1	0	0	0	1	0	0
36	1	0	0	0	0	2	0	2	0	0	0	0	0	0	0	0	0	0	0	0	0	0	0	0	0	0	0	0	0	0	0	140	80	140	100	0	0	0	0	0	0	4	1	0	0	0	0	0	0
42	1	0	0	0	0	0	0	0	0	0	0	0	0	0	0	0	0	0	0	0	0	0	0	0	0	0	0	0	0	0	1	127	79	120	80	0	0	0	0	0	0	4	1	0	0	0	0	0	0
60	0	2	2	2	1	2	0	5	0	0	0	0	0	0	0	0	0	0	0	0	0	0	0	0	0	0	0	0	0	0	0	153	91	160	100	0	0	0	0	0	0	0	1	3	0	0	1	0	0
64	1	0	2	2	2	0	0	0	0	0	0	0	0	0	0	0	0	0	0	0	0	0	0	0	0	0	0	0	0	0	0	124	77	120	80	0	0	0	0	0	0	4	1	0	0	0	1	0	0
53	0	0	6	2	2	3	0	7	0	0	0	0	0	0	0	0	0	0	0	0	0	0	0	1	0	0	0	0	0	0	0	158	91	170	95	0	0	0	0	0	0	0	0	2	1	0	0	0	0
65	1	1	5	2	2	0	0	0	0	1	0	0	0	0	0	0	0	0	0	0	0	0	0	0	0	0	0	0	0	0	0	137	80	130	80	0	0	0	0	0	0	1	1	0	0	0	1	0	0
47	0	1	5	2	1	2	0	7	0	0	0	0	0	0	0	0	0	0	0	0	0	0	0	0	0	0	0	0	0	0	0	140	90	180	100	0	0	0	0	0	0	4	1	0	0	0	1	0	0
72	1	0	6	4	1	2	0	4	0	0	0	0	0	0	0	0	0	0	0	0	0	0	0	0	0	0	0	0	0	0	0	149	89	150	100	0	0	0	0	0	0	0	0	4	1	0	1	0	0
70	0	2	6	2	1	3	0	7	0	0	0	0	0	0	0	0	0	0	0	0	0	0	0	1	0	0	0	0	0	0	0	169	95	180	100	0	0	0	0	0	0	1	0	0	0	0	0	0	0
67	1	1	3	2	1	2	0	5	0	0	0	1	0	0	0	0	0	0	0	0	0	0	0	0	0	0	1	0	0	0	0	160	91	160	95	0	0	0	0	0	0	1	1	0	0	0	1	0	0
53	1	1	0	0	2	2	0	4	0	0	0	1	0	0	0	0	0	0	1	0	0	0	0	0	0	0	0	0	0	0	0	130	77	120	70	0	0	0	0	0	0	4	2	0	0	0	1	0	0
70	0	0	3	2	1	2	0	2	0	0	0	0	0	0	0	0	0	0	0	0	0	0	0	0	0	0	1	0	0	0	0	141	84	130	90	0	0	0	0	0	0	4	1	0	0	0	1	0	0
61	1	0	0	0	2	0	0	0	0	0	0	0	0	0	0	0	0	0	0	0	0	0	0	0	0	0	0	0	0	0	0	130	80	130	80	0	0	0	0	0	0	0	0	1	1	0	1	0	0
44	1	0	0	0	0	2	0	7	0	0	0	0	0	0	0	0	0	0	0	0	0	0	0	0	0	0	0	0	0	0	0	140	80	160	100	0	0	0	0	0	0	0	0	1	1	0	1	0	0
54	1	0	0	0	2	0	0	0	0	0	0	0	0	0	0	0	0	0	0	0	0	0	0	0	0	0	0	0	0	0	0	129	80	130	80	0	0	0	0	0	0	0	1	0	0	0	1	0	0
83	0	1	2	2	1	3	0	7	0	0	0	0	0	0	0	0	0	0	0	0	0	0	0	1	0	0	0	0	0	0	0	151	84	140	80	0	0	0	0	0	0	0	0	2	0	0	1	0	0
70	0	0	6	2	2	2	0	6	0	0	0	0	0	0	0	0	0	0	0	0	0	0	0	0	0	0	0	0	0	0	0	141	79	140	70	0	0	0	0	0	0	1	1	0	1	0	1	0	0
66	0	1	1	2	1	2	0	6	0	0	0	0	0	0	0	1	0	1	0	0	0	0	0	0	1	0	0	0	0	0	0	146	84	140	80	0	0	0	0	0	0	1	1	0	1	0	0	0	0
43	1	0	0	0	0	2	0	5	0	0	0	0	0	0	0	0	0	0	0	0	0	0	0	0	0	0	0	0	0	0	0	174	102	200	110	0	0	0	0	0	0	4	1	0	0	0	1	0	0
58	1	0	6	2	1	2	0	7	0	0	0	0	0	0	0	0	0	0	0	0	0	0	0	0	0	0	1	0	0	0	0	143	86	140	90	0	0	0	0	0	0	1	1	0	0	0	1	0	0
56	1	1	1	2	1	0	0	0	0	0	0	0	0	0	0	0	0	0	0	0	0	0	0	0	0	0	0	0	0	0	0	130	90	130	80	0	0	0	0	0	0	4	2	0	0	0	0	0	0
52	1	0	1	2	1	0	0	0	0	0	0	0	0	0	0	0	0	0	0	0	0	0	0	0	0	0	0	0	0	0	0	130	79	130	80	0	0	0	0	0	0	1	1	0	0	0	1	0	0
57	1	0	0	0	0	0	0	0	0	0	0	0	0	0	0	0	0	0	0	0	0	0	0	0	0	0	1	0	0	0	0	110	70	140	90	0	0	0	0	0	0	4	1	0	0	0	1	0	0
59	1	0	0	0	0	2	0	5	0	0	0	0	0	0	0	0	0	0	0	0	0	0	0	0	0	0	0	0	0	0	0	134	80	120	80	0	0	1	0	0	0	1	0	0	0	0	0	1	0
72	0	1	5	2	2	2	0	6	0	0	0	0	0	0	0	0	0	0	0	0	0	0	0	0	0	0	0	0	0	0	0	220	100	170	100	0	0	0	0	0	0	0	1	0	0	0	1	0	0
64	0	0	0	0	0	2	0	7	0	0	0	0	0	0	0	0	0	0	0	0	0	0	0	0	0	0	0	0	0	1	0	134	79	120	70	0	0	0	0	0	0	1	1	0	0	0	1	0	0
55	1	1	3	2	1	3	0	6	0	0	0	0	0	0	0	0	0	0	0	0	0	0	0	0	0	0	0	0	0	0	0	160	90	130	80	0	0	0	0	0	0	0	0	3	0	0	1	0	0
80	1	0	3	2	1	2	0	4	0	0	0	0	0	0	0	0	0	0	0	0	0	0	0	0	0	0	0	0	0	0	0	136	80	120	80	0	0	0	0	0	0	4	1	0	0	0	1	0	0
70	1	1	6	2	2	0	0	0	0	0	0	0	0	0	0	0	0	0	0	0	0	0	0	0	0	0	0	0	0	0	0	160	90	110	70	0	0	0	0	0	0	0	0	2	2	0	1	0	0
64	1	0	4	2	1	2	0	5	0	0	0	0	0	0	0	0	0	0	0	0	0	0	0	0	0	0	0	0	0	0	0	135	80	132	80	0	0	0	0	0	0	0	0	4	0	0	1	0	0
57	1	0	6	2	1	0	0	0	0	0	0	0	0	0	0	0	0	0	0	0	0	0	0	0	0	0	0	0	0	0	0	160	90	150	90	0	0	0	0	0	0	0	0	1	4	0	1	0	0
65	0	0	6	2	1	2	0	7	0	0	0	0	0	0	0	0	0	0	0	0	0	0	0	1	0	0	1	0	0	0	0	151	85	160	80	0	0	0	0	0	0	0	0	4	2	0	1	0	0
74	1	2	5	2	2	2	0	7	0	0	0	0	1	0	0	0	0	0	1	0	0	0	0	0	0	0	0	0	0	0	0	102	62	70	50	1	0	0	0	0	0	4	1	0	0	0	0	0	0
63	1	0	0	0	0	0	0	0	0	0	0	0	0	0	0	0	0	0	0	0	0	0	0	0	0	0	0	0	0	0	0	160	100	140	80	0	0	0	0	0	0	0	0	4	1	0	1	0	0
70	0	1	2	2	1	2	0	7	0	0	0	0	0	0	0	0	0	0	0	0	0	0	0	1	0	0	0	0	0	0	0	149	84	140	80	0	0	0	0	0	0	2	1	0	0	0	0	0	0
61	1	0	2	2	1	2	0	7	0	0	0	0	0	0	0	0	0	0	0	0	0	0	0	0	0	0	0	0	0	0	0	160	90	140	90	0	0	0	0	0	0	4	0	0	0	0	1	0	0
67	1	0	0	0	2	2	0	5	0	0	0	0	0	0	0	0	0	0	0	0	0	0	0	0	0	0	0	0	0	0	0	171	96	180	100	0	0	0	0	0	0	4	1	0	0	0	0	0	0
46	0	2	5	1	1	2	0	5	0	0	0	0	0	0	0	0	0	0	0	0	0	0	0	0	0	0	0	0	0	0	0	160	90	190	110	0	0	0	0	0	0	4	1	0	0	0	1	0	0
58	1	0	0	0	0	2	0	5	0	0	0	0	0	0	0	0	0	0	0	0	0	0	0	0	0	0	0	0	0	0	0	110	70	116	73	0	0	0	0	0	0	0	0	2	0	0	1	0	0
45	1	0	1	2	2	0	0	0	0	0	0	0	0	0	0	0	0	0	0	0	0	0	0	0	0	0	0	0	0	0	0	141	86	160	90	0	0	0	0	0	0	0	0	1	1	0	1	0	0
67	1	1	3	2	2	2	0	3	0	0	0	0	0	0	0	0	0	0	0	0	0	0	0	0	0	0	0	0	0	0	0	160	90	160	100	0	0	0	0	0	0	1	1	0	0	0	1	0	0
67	1	0	3	1	1	2	0	1	0	0	0	0	0	0	0	0	0	0	0	0	0	0	0	0	0	0	0	0	0	0	0	136	80	130	80	0	0	0	0	0	0	1	1	0	0	0	1	0	0
66	0	1	3	3	2	2	0	7	0	0	0	1	0	0	0	0	0	0	0	0	0	0	0	0	1	0	0	0	0	0	0	152	88	150	90	0	0	0	0	0	0	0	1	0	0	0	0	0	0
73	1	0	0	0	0	0	0	0	0	0	0	0	0	0	0	0	0	0	0	0	0	0	0	0	0	0	0	1	0	0	0	128	74	120	70	0	0	0	0	0	0	4	1	0	0	0	0	1	0
75	1	3	5	2	2	2	0	7	0	0	0	0	0	0	0	0	0	0	0	0	0	0	0	0	0	0	0	0	0	0	0	145	83	137	82	1	0	0	0	0	0	4	1	0	0	0	1	0	0
55	0	0	0	0	2	2	0	6	0	0	0	0	0	0	0	0	0	0	0	0	0	0	0	0	0	0	1	0	0	0	0	160	110	140	90	0	0	0	0	0	0	4	2	0	0	0	1	0	0
56	1	0	0	0	0	2	0	4	0	0	0	0	0	0	0	0	0	0	0	0	0	0	0	0	0	0	0	0	0	0	1	137	82	130	80	0	0	0	0	0	0	1	1	0	0	0	0	0	0
55	1	0	0	0	0	0	0	0	0	0	0	0	0	0	0	0	0	0	0	0	0	0	0	0	0	0	0	0	0	0	0	123	77	120	80	0	0	0	0	0	0	0	0	4	1	1	1	0	0
74	1	0	4	2	1	2	0	3	0	0	0	0	0	0	0	0	0	0	0	0	0	0	0	0	0	0	1	0	0	0	0	154	87	160	90	0	0	0	0	0	0	1	1	0	0	0	1	0	0
65	0	0	6	2	1	0	0	0	0	0	0	0	0	0	0	0	0	0	0	0	0	0	0	0	0	0	0	0	0	0	0	125	73	120	70	0	0	0	0	0	0	4	1	0	0	0	1	0	0
73	1	0	0	0	0	2	0	1	0	0	0	0	0	0	0	0	0	0	0	0	0	0	0	0	0	0	0	0	0	0	0	157	91	160	100	0	0	0	0	0	0	0	0	0	1	0	1	0	0
56	1	2	0	0	0	2	0	3	0	0	0	0	0	0	0	0	0	0	0	0	0	0	0	0	0	0	0	0	0	0	0	124	78	120	80	0	0	0	0	0	0	0	0	3	1	0	1	0	0
73	1	1	0	0	0	2	0	7	0	0	0	0	0	0	0	0	0	0	0	0	0	0	0	0	0	0	0	0	0	0	0	125	80	125	78	0	0	0	0	0	0	0	0	2	0	0	1	0	0
75	0	0	1	3	1	2	0	7	1	0	0	0	0	0	0	0	0	0	0	0	0	0	0	1	0	0	0	0	0	0	0	110	60	140	80	0	0	0	0	0	0	4	1	0	0	0	1	0	0
52	0	1	1	2	1	2	0	6	0	0	0	0	0	0	0	0	0	0	0	0	0	0	0	0	0	0	0	0	0	0	0	130	80	130	80	0	0	0	0	0	0	0	0	3	1	0	1	0	0
88	0	0	0	0	0	0	0	0	0	0	0	0	0	0	0	0	0	0	0	0	0	0	0	0	0	0	0	0	0	0	0	130	80	130	90	0	0	0	0	0	0	0	0	3	3	1	0	0	0
57	1	0	0	0	2	3	0	6	0	0	0	0	0	0	0	0	0	0	0	0	0	0	0	0	0	0	0	0	0	0	0	210	110	150	80	0	0	0	0	0	0	0	0	3	1	0	1	0	0
69	0	0	0	0	0	2	0	7	0	0	0	0	0	0	0	0	0	0	0	0	0	0	0	0	0	0	0	0	0	0	0	151	89	150	90	0	0	0	0	0	0	1	1	0	0	0	1	0	0
54	1	0	0	0	2	0	0	0	0	0	0	0	0	0	0	0	0	0	0	0	0	0	0	0	0	0	0	0	0	0	0	121	78	120	80	0	0	0	0	0	0	0	1	1	1	0	1	0	0
63	1	1	5	2	1	3	0	7	0	0	0	0	0	0	0	0	0	0	0	0	0	0	0	0	0	0	0	0	0	0	0	160	90	220	100	0	0	0	0	0	0	0	0	3	2	0	1	0	0
56	1	1	4	2	2	2	0	6	0	0	0	0	0	0	0	0	0	0	0	0	0	0	0	0	0	0	0	0	0	0	0	120	80	110	70	0	0	0	0	0	0	4	1	0	0	0	1	0	0
59	1	0	5	2	1	2	0	2	3	0	0	0	0	1	0	0	0	0	0	0	0	0	0	0	0	0	0	0	0	0	0	120	70	120	90	0	0	1	0	0	0	0	0	1	0	0	0	1	0
63	1	0	0	0	0	0	0	0	0	0	0	0	0	0	0	0	0	0	0	0	0	0	0	0	0	0	0	0	0	0	0	110	70	120	80	0	0	0	0	0	0	0	0	4	3	0	0	0	0
55	1	3	5	2	1	0	0	0	0	0	0	0	0	0	0	0	0	0	0	0	0	0	0	0	0	0	1	0	0	0	0	109	69	108	68	0	0	0	0	0	0	4	1	0	0	0	1	0	0
53	1	0	1	1	2	0	0	0	0	0	0	0	0	0	0	0	0	0	0	0	0	0	0	0	0	0	0	0	0	0	0	116	74	118	75	0	0	0	0	0	0	0	0	3	3	0	1	0	0
62	1	0	0	0	0	0	0	0	0	0	0	0	0	0	0	0	0	0	0	0	0	0	0	0	0	0	0	0	0	0	0	60	30	150	90	0	0	0	0	0	0	4	4	0	0	0	0	0	0
71	0	1	4	2	1	2	0	7	0	0	0	0	0	0	0	0	0	0	0	0	0	0	0	0	0	0	0	0	0	0	0	133	79	120	80	0	0	0	0	0	0	0	1	1	0	1	1	0	0
69	0	0	6	2	1	0	1	7	0	0	0	0	0	0	0	0	0	0	0	0	0	0	0	0	0	0	0	0	0	0	0	130	85	150	90	0	0	0	0	0	0	1	1	0	0	0	1	0	0
70	1	1	6	2	2	1	0	7	3	0	0	0	0	0	0	0	0	0	0	1	0	0	0	0	0	0	0	0	0	0	0	142	85	130	90	0	0	0	0	0	0	1	1	0	0	0	1	0	0
60	1	1	0	0	2	2	0	5	0	0	0	0	0	0	0	0	0	0	0	0	0	0	0	0	0	0	1	0	0	0	0	140	80	160	90	0	0	0	0	0	0	0	0	3	0	0	1	0	0
56	1	1	1	2	2	2	0	3	0	0	0	0	0	0	0	0	0	0	0	0	0	0	0	0	0	0	1	0	0	0	0	125	78	120	80	0	0	0	0	0	0	4	1	0	0	0	1	0	0
59	1	0	0	0	0	0	0	0	0	0	0	0	0	0	0	0	0	0	0	0	0	0	0	0	0	0	0	0	0	0	0	124	78	130	80	0	0	0	0	0	0	0	1	4	3	0	1	0	0
52	1	1	0	0	2	2	0	6	0	0	0	0	1	0	0	0	0	0	0	0	0	0	0	0	0	0	0	0	0	0	0	160	95	160	100	0	0	0	0	0	0	0	1	0	0	0	1	0	0
30	1	0	0	0	0	0	0	0	0	0	0	0	0	0	0	0	0	0	0	0	0	0	0	0	0	0	0	0	0	0	0	110	70	120	80	0	0	0	0	0	0	1	3	0	0	0	1	0	0
81	1	0	0	0	0	3	0	7	0	0	0	0	0	0	0	0	0	0	0	0	0	0	0	0	0	0	1	0	0	0	0	180	90	180	90	0	0	0	0	0	0	0	0	3	0	0	1	0	0
60	1	0	0	0	0	2	0	6	0	0	0	0	0	0	0	0	0	0	0	0	0	0	0	0	0	0	0	0	0	0	0	150	90	160	90	0	0	0	0	0	0	1	1	0	0	0	1	0	0
62	1	0	3	2	2	0	0	0	0	0	0	0	0	0	0	0	0	0	0	0	0	0	0	0	0	0	0	0	0	0	0	126	77	120	80	0	0	0	0	0	0	0	0	3	0	0	1	0	0
54	0	0	0	0	2	2	0	2	0	0	0	0	0	0	0	0	0	0	0	0	0	0	0	0	0	0	0	0	0	0	0	160	90	140	90	0	0	0	0	0	0	1	1	0	0	0	1	0	0
55	1	1	2	2	1	2	0	2	0	0	0	0	0	0	0	0	0	0	0	0	0	0	0	0	0	0	0	0	0	0	0	80	60	160	90	0	0	0	1	0	0	0	1	1	0	0	1	0	0
53	1	0	0	0	2	0	1	4	0	0	0	0	0	0	0	0	0	0	0	0	0	0	0	0	0	0	0	0	0	0	0	148	88	150	90	0	0	0	0	0	0	1	1	0	0	0	1	0	0
56	1	1	2	1	1	2	0	6	0	0	0	0	0	0	0	0	0	0	0	0	0	0	0	0	0	0	0	0	0	0	0	157	93	160	100	0	0	0	0	0	0	1	1	0	0	0	1	0	0
43	1	2	5	2	2	2	0	1	0	0	0	0	0	0	0	0	0	0	0	0	0	0	0	0	0	0	0	0	0	0	0	120	80	110	70	0	0	0	0	0	0	4	1	0	0	0	1	0	0
64	1	1	2	2	2	0	0	0	0	0	0	0	0	0	0	0	0	0	0	0	0	0	0	0	0	0	0	0	1	0	0	133	82	130	90	0	0	0	0	0	0	1	1	0	0	0	0	0	0
43	1	0	0	0	0	0	0	0	0	0	0	0	0	0	0	0	0	0	0	0	0	0	0	0	0	0	0	0	0	0	0	130	80	110	70	0	0	0	0	0	0	0	0	1	0	0	0	0	1
37	1	0	0	0	0	2	0	1	0	0	0	0	0	0	0	0	0	0	0	0	0	0	0	0	0	0	0	0	0	0	0	138	86	150	90	0	0	0	0	0	0	0	0	4	0	0	1	0	0
71	0	1	6	1	1	2	0	7	0	0	0	0	0	0	0	0	0	0	0	0	0	0	0	0	0	0	0	0	0	0	0	131	79	120	80	0	0	0	0	0	0	0	1	3	3	0	0	0	0
60	0	0	0	0	2	2	0	6	0	0	0	0	0	0	0	0	0	0	0	0	0	0	0	1	0	0	0	0	0	0	0	180	100	120	80	0	0	0	0	0	0	0	1	1	0	0	1	0	0
58	1	3	6	2	2	2	0	2	0	0	0	0	0	0	0	0	0	0	0	0	0	0	0	0	0	0	0	0	0	0	0	90	60	120	80	0	0	0	0	0	0	1	0	1	0	0	1	0	0
56	1	2	0	0	0	0	0	0	0	0	0	0	0	0	0	0	0	0	0	0	0	0	0	0	0	0	0	0	0	0	0	127	79	130	80	0	0	0	0	0	0	0	0	1	1	0	1	0	0
51	1	1	0	0	0	0	0	0	0	0	0	0	1	0	0	0	0	0	0	0	0	0	0	0	0	0	0	0	0	0	0	105	70	120	80	0	0	0	0	0	0	1	1	0	0	0	1	0	0
71	0	1	0	0	0	2	0	2	0	0	0	0	1	0	0	0	0	0	0	0	0	0	0	0	0	0	1	0	0	0	0	220	110	200	110	0	0	1	0	0	0	0	0	0	1	0	1	0	0
66	1	0	0	0	0	0	0	0	0	0	0	0	0	0	0	0	0	0	0	0	0	0	0	0	0	0	0	0	0	0	0	123	77	120	80	0	0	0	0	0	0	0	0	2	1	0	0	0	0
76	1	2	6	2	1	0	0	0	0	0	0	0	0	0	0	0	0	0	0	0	0	0	0	0	0	0	0	0	0	0	0	131	77	130	80	0	0	0	0	0	0	3	1	0	0	0	1	0	0
56	1	0	0	0	0	0	0	0	0	0	0	0	0	0	0	0	0	0	0	0	0	0	0	0	0	0	0	1	0	0	0	121	76	120	80	0	0	0	0	0	0	1	0	0	0	0	0	0	0
62	0	0	0	0	0	2	0	7	0	0	0	0	0	0	0	0	0	0	0	0	0	0	0	0	0	0	0	0	0	0	0	180	90	140	80	0	0	0	0	0	0	4	2	0	0	0	1	0	0
46	1	0	1	2	1	0	1	6	0	0	0	0	0	0	0	0	0	0	0	0	0	0	0	1	0	0	0	0	0	0	0	149	91	150	100	0	0	0	0	0	0	4	1	0	0	0	0	0	0
58	1	2	4	2	2	0	0	0	1	0	0	0	0	0	0	0	0	0	0	0	0	0	0	0	0	0	1	0	0	0	0	132	79	130	80	0	0	0	0	0	0	1	1	0	0	0	1	0	0
82	1	0	0	0	0	2	0	0	0	0	0	0	0	0	0	0	0	0	0	0	0	0	0	0	0	0	0	0	0	0	0	200	100	120	80	0	0	0	0	0	0	1	1	0	0	0	1	0	0
62	1	0	6	2	1	0	0	0	0	0	0	0	0	0	0	0	0	0	0	0	0	0	0	0	0	0	0	0	0	0	0	80	60	100	60	0	0	0	0	0	0	0	0	1	1	0	1	0	0
83	0	0	0	0	0	3	0	7	0	0	0	0	0	0	0	0	0	0	0	0	0	0	0	0	0	0	1	0	0	0	0	91	56	60	40	0	0	1	0	0	0	0	0	3	0	1	0	1	0
78	1	0	0	0	0	0	0	0	0	0	0	0	0	0	0	0	0	0	0	0	0	0	0	0	0	0	0	0	0	0	0	144	84	140	90	0	0	0	0	0	0	4	1	0	0	0	1	0	0
54	1	1	1	2	1	0	0	0	0	0	0	0	0	0	0	0	0	0	0	0	0	0	0	0	0	0	0	0	0	0	0	129	81	130	90	0	0	0	0	0	0	1	1	0	0	0	1	0	0
73	1	0	0	0	0	0	0	0	0	0	0	0	0	0	0	0	0	0	0	0	0	0	0	0	0	0	0	0	0	0	0	190	100	120	80	0	0	0	0	0	0	0	0	3	1	0	1	0	0
67	1	3	3	2	2	2	0	7	0	0	0	0	0	0	0	0	0	0	0	0	0	0	0	1	0	0	0	0	0	0	0	146	84	140	80	0	0	0	0	0	0	1	1	0	0	0	0	0	0
35	1	0	0	0	2	2	0	6	0	0	0	0	0	0	0	0	0	0	0	0	0	0	0	0	0	0	0	0	0	0	0	151	93	170	100	0	0	0	0	0	0	0	1	0	4	0	1	0	0
40	1	0	3	2	1	2	0	0	0	0	0	0	0	0	0	0	0	0	0	0	0	0	0	0	0	0	0	0	0	0	0	154	99	180	120	0	0	0	0	0	0	0	0	1	0	0	1	0	0
52	1	0	0	0	2	3	0	6	0	0	0	0	0	0	0	0	0	0	0	0	0	0	0	0	0	0	0	0	0	0	0	151	90	149	93	0	0	0	0	0	0	4	1	0	0	0	1	0	0
77	1	0	0	0	0	2	0	5	0	0	0	0	0	0	0	0	0	0	0	0	0	0	0	0	0	0	0	0	0	0	0	163	87	160	80	0	0	0	0	0	0	1	1	0	0	0	1	0	0
64	1	1	1	2	1	3	0	6	0	0	0	0	0	0	0	0	0	0	0	0	0	0	0	0	0	0	0	0	0	0	0	141	85	140	90	0	0	0	0	0	0	4	1	0	0	0	1	0	0
58	1	1	6	2	1	3	0	7	0	0	0	0	0	0	0	0	0	0	0	0	0	0	0	0	0	0	0	0	0	0	0	134	83	120	90	0	0	0	0	0	0	0	0	4	2	0	1	0	0
70	1	0	4	2	1	2	0	6	0	0	0	0	0	0	0	0	0	0	0	0	0	0	0	0	0	0	0	0	0	0	0	151	87	147	88	0	0	0	0	0	0	1	1	0	0	0	1	0	0
40	1	0	1	2	1	3	0	5	0	0	0	0	0	0	0	0	0	0	0	0	0	0	0	0	0	0	0	0	0	0	0	210	190	170	110	0	0	0	0	0	0	1	1	0	0	0	1	0	0
62	1	0	0	0	0	2	0	5	0	0	0	0	0	0	0	0	0	0	0	0	0	0	0	0	0	0	1	0	0	0	0	160	100	130	80	0	0	0	0	0	0	0	0	3	1	0	1	0	0
56	1	2	1	2	1	0	0	0	0	0	0	0	0	0	0	0	0	0	0	0	0	0	0	0	0	0	1	0	0	0	0	126	78	130	80	0	0	0	0	0	0	3	1	0	0	0	1	0	0
82	0	1	4	2	1	2	0	7	0	0	0	0	0	0	0	0	0	0	0	0	0	0	0	1	0	0	0	0	0	0	0	164	87	160	80	1	0	0	0	0	0	0	1	2	0	0	1	0	0
71	1	1	6	2	1	0	0	0	0	0	0	0	0	0	0	0	0	0	0	0	0	0	0	0	0	0	1	0	0	0	0	110	70	110	70	0	0	0	0	0	0	0	0	1	0	0	1	0	0
52	1	0	0	0	0	0	0	0	0	0	0	0	0	0	0	0	0	0	0	0	0	0	0	0	0	0	0	0	0	0	1	124	77	120	80	0	0	0	0	0	0	1	1	0	0	0	1	0	0
52	1	1	0	0	0	0	1	6	0	0	0	0	0	0	0	0	0	0	0	0	0	0	0	0	0	0	1	0	0	0	0	130	90	120	90	0	0	0	0	0	0	2	1	0	0	0	1	0	0
54	0	1	5	2	2	0	1	4	0	0	0	0	0	0	0	0	0	0	0	0	0	0	0	1	0	0	0	0	0	0	0	160	90	190	100	1	0	0	0	0	0	4	2	0	0	0	1	0	0
70	0	0	6	2	1	3	0	7	0	0	0	0	0	0	0	0	0	0	0	0	0	0	0	0	0	0	0	0	0	0	0	167	92	170	90	0	0	0	0	0	0	1	1	0	0	0	1	0	0
58	1	0	0	0	0	0	0	0	0	0	0	0	0	0	0	0	0	0	0	0	0	0	0	0	0	0	1	0	0	0	0	140	81	140	80	0	0	0	0	0	0	4	1	0	0	0	0	0	0
36	1	0	1	2	2	0	0	0	0	0	0	0	0	0	0	0	0	0	0	0	0	0	0	0	0	0	0	0	0	0	0	110	70	120	70	0	0	0	0	0	0	1	1	0	0	0	1	0	0
43	0	0	0	0	2	2	0	4	0	0	0	0	0	0	0	0	0	0	0	0	0	0	0	0	0	0	0	0	0	0	1	140	87	143	89	0	0	0	0	0	0	2	1	0	0	0	1	0	0
63	1	0	1	2	1	0	0	0	0	0	0	0	1	0	0	0	0	0	0	0	0	0	0	0	0	0	1	0	0	0	0	109	67	90	60	0	0	0	0	0	0	1	1	0	0	0	1	0	0
72	1	0	0	0	0	3	0	7	0	0	0	0	0	0	0	0	0	0	0	0	0	0	0	0	0	0	0	0	0	0	0	142	83	140	80	0	0	0	0	0	0	4	1	0	0	0	1	0	0
50	0	3	6	2	1	0	1	7	0	1	0	0	0	0	0	0	0	0	0	0	0	0	0	0	0	0	0	0	0	0	0	90	50	140	90	0	0	0	0	0	0	1	1	0	0	0	1	0	0
52	1	0	0	0	0	2	0	4	0	0	0	0	0	0	0	0	0	0	0	0	0	0	0	0	0	0	0	0	0	0	0	140	80	141	87	0	0	0	0	0	0	1	1	0	0	0	1	0	0
51	1	3	5	2	2	2	0	4	0	0	0	0	0	0	0	0	0	0	0	0	0	0	0	0	0	0	1	0	0	0	0	140	80	130	100	0	0	0	0	0	0	2	0	0	0	0	1	0	0
71	0	2	5	2	1	2	0	6	3	0	0	1	0	0	0	0	0	0	0	0	0	0	0	0	0	0	0	0	0	0	0	151	84	160	80	0	0	0	0	0	0	0	0	1	1	0	1	0	0
54	0	0	0	0	0	2	0	6	0	0	0	0	1	0	0	0	0	0	0	0	0	0	0	0	0	0	0	0	0	0	0	142	86	130	90	1	0	1	0	0	0	1	1	0	0	0	0	1	0
80	0	0	2	3	1	3	0	7	0	0	0	0	0	0	0	0	0	0	0	0	0	0	0	0	0	0	1	0	0	0	0	100	50	60	40	0	0	0	0	0	0	0	1	4	0	0	0	0	1
56	1	0	3	2	1	2	0	5	0	0	0	0	0	0	0	0	0	0	0	0	0	0	0	0	0	0	0	0	0	0	0	168	95	180	100	0	0	0	0	0	0	1	4	0	0	0	1	0	0
53	1	0	0	0	0	0	0	0	0	0	0	0	0	0	0	0	0	0	0	0	0	0	0	0	0	0	0	0	0	0	0	110	80	120	80	0	0	0	0	0	0	4	1	0	0	0	1	0	0
85	1	0	6	2	1	2	0	7	0	0	0	0	0	0	0	0	0	0	0	0	0	0	0	0	0	0	0	0	0	0	0	130	80	130	80	0	0	0	0	0	0	1	1	4	0	0	1	0	0
57	1	0	2	2	2	0	0	0	0	0	0	0	0	0	0	0	0	0	0	0	0	0	0	0	0	0	0	0	0	0	0	113	74	110	80	0	0	0	0	0	0	0	0	4	1	0	1	0	0
62	1	0	0	0	0	2	0	5	0	0	0	0	0	0	0	0	0	0	0	0	0	0	0	0	0	0	0	0	0	0	0	141	84	138	86	0	0	0	0	0	0	4	1	0	0	0	1	0	0
59	0	0	6	2	1	2	0	6	0	0	0	0	0	0	0	0	0	0	0	0	0	0	0	0	0	0	0	0	0	0	0	170	100	130	90	0	0	0	0	0	0	1	1	0	0	0	1	0	0
67	0	0	0	0	0	0	0	0	0	0	0	0	0	0	0	0	0	0	0	0	0	0	0	0	0	0	0	0	0	0	0	134	79	130	80	0	0	0	0	0	0	4	3	0	0	0	1	0	0
70	0	0	0	0	2	2	0	7	0	0	0	0	0	0	0	0	0	0	0	0	0	0	0	0	0	0	1	0	0	0	0	180	80	170	100	0	0	0	0	0	0	1	1	0	0	0	0	0	0
68	1	1	6	2	1	2	0	5	0	0	0	0	0	0	0	0	0	0	0	0	0	0	0	0	0	0	0	0	0	0	0	173	96	180	100	0	0	0	0	0	0	1	1	0	0	0	1	0	0
61	0	0	0	0	0	2	0	1	0	0	0	0	0	0	0	0	0	0	0	0	0	0	0	0	0	0	0	0	0	0	0	154	91	160	100	0	0	0	0	0	0	1	1	0	0	0	1	0	0
51	1	0	0	0	0	0	1	6	0	0	0	0	0	0	0	0	0	0	0	0	0	0	0	0	0	0	0	0	0	0	0	170	100	190	110	0	0	0	0	0	0	1	1	0	0	0	1	0	0
47	1	0	0	0	0	2	0	4	0	0	0	0	0	0	0	0	0	0	0	0	0	0	0	0	0	0	1	0	0	0	0	165	96	180	100	0	0	0	0	0	0	4	2	0	0	0	1	0	0
67	1	1	0	0	0	2	0	5	0	0	0	0	0	0	0	0	0	0	0	0	0	0	0	0	0	0	0	0	0	0	0	145	84	140	80	0	0	0	0	0	0	0	0	1	1	0	0	0	0
67	1	1	5	2	1	0	1	7	0	0	0	0	0	0	0	0	0	0	0	0	0	0	0	0	0	0	0	0	0	0	0	218	120	260	140	0	0	0	0	0	0	1	1	0	0	0	1	0	0
52	0	0	0	0	0	3	0	6	0	0	0	0	0	0	0	0	0	0	0	0	0	0	0	0	0	0	0	0	0	0	0	195	116	220	140	0	0	0	0	0	0	1	1	0	0	0	1	0	0
52	1	0	0	0	0	0	0	0	0	0	0	0	0	0	0	0	0	0	0	0	0	0	0	0	0	0	0	0	0	0	0	105	70	140	90	0	0	0	0	0	0	4	3	0	0	0	1	0	0
52	1	1	0	0	0	0	0	0	0	0	0	0	0	0	0	0	0	0	0	0	0	0	0	0	0	0	0	0	0	0	0	120	80	120	80	0	0	0	0	0	0	0	1	2	1	0	0	0	0
65	1	0	0	0	0	2	0	6	1	0	0	0	0	0	0	0	0	0	0	0	0	0	0	0	0	0	0	0	0	0	0	150	87	140	90	0	0	0	0	0	0	1	1	0	0	0	1	0	0
50	1	0	0	0	0	2	0	7	0	0	0	0	0	0	0	0	0	0	0	0	0	0	0	0	0	0	1	0	0	0	0	151	90	152	94	0	0	0	0	0	0	0	0	1	0	0	1	0	0
60	0	0	0	0	2	2	0	6	0	0	0	0	0	0	0	0	0	0	0	0	0	0	0	0	0	0	0	0	0	0	0	137	82	130	80	0	0	0	0	0	0	1	1	0	0	0	1	0	0
71	0	2	5	2	1	2	0	7	0	0	0	0	0	0	0	0	0	0	0	0	0	0	0	0	0	0	0	0	0	0	0	153	85	160	80	1	0	0	0	0	0	0	0	1	0	0	1	0	0
37	1	0	0	0	0	0	0	0	0	0	0	0	0	0	0	0	0	0	0	0	0	0	0	0	0	0	0	0	0	0	0	121	77	120	80	0	0	0	0	0	0	4	1	0	0	0	1	0	0
54	1	0	0	0	0	0	0	0	0	0	0	0	0	0	0	0	0	0	0	0	0	0	0	0	0	0	0	0	0	0	0	140	82	160	80	0	0	0	0	0	0	0	0	2	0	0	1	0	0
74	1	3	2	2	1	2	0	5	0	0	0	0	0	0	0	0	0	0	0	0	0	0	0	0	0	0	1	0	0	0	0	137	80	120	80	0	0	0	0	0	0	0	1	0	0	0	1	0	0
58	1	0	3	2	1	0	0	2	1	0	0	0	0	0	0	0	0	0	0	0	0	0	0	0	0	0	1	0	0	0	0	164	93	180	100	0	0	0	0	0	0	4	3	0	0	0	1	0	0
69	1	0	3	2	1	2	0	1	0	0	0	0	0	0	0	0	0	0	0	0	0	0	0	0	0	0	1	0	0	0	0	137	80	140	80	0	0	0	0	0	0	1	1	0	0	0	1	0	0
60	0	0	0	0	2	2	0	6	0	0	0	0	0	0	0	0	0	0	0	0	0	0	0	0	0	0	1	0	0	0	0	180	100	130	80	0	0	0	0	0	0	0	0	4	1	0	0	0	0
67	1	0	6	2	1	2	0	5	0	0	0	0	0	0	0	0	0	0	0	0	0	0	0	0	0	0	0	0	0	0	0	140	80	140	80	0	0	0	0	0	0	4	0	4	0	0	1	0	0
58	1	0	0	0	0	0	0	0	0	0	0	0	0	0	0	0	0	0	0	0	0	0	0	1	0	0	0	0	0	0	0	123	77	127	78	0	0	0	0	0	0	0	0	3	1	0	1	0	0
69	0	1	2	3	1	0	0	0	0	0	0	0	0	0	0	0	0	0	0	0	0	0	0	0	0	0	0	0	0	0	0	144	85	150	90	0	0	0	0	0	0	4	0	0	0	0	1	0	0
54	0	0	0	0	0	2	0	7	0	0	0	0	0	0	0	0	0	0	0	0	0	0	0	1	0	0	0	0	0	0	0	156	91	160	90	0	0	0	0	0	0	4	1	0	0	0	1	0	0
67	0	0	0	0	0	2	0	6	0	0	0	0	0	0	0	0	0	0	0	0	0	0	0	1	0	0	0	0	0	0	0	150	90	200	100	0	0	0	0	0	0	2	1	0	0	0	1	0	0
56	1	0	3	2	2	0	0	0	0	0	0	0	0	0	0	0	0	0	0	0	0	0	0	0	0	0	0	0	0	0	0	130	80	110	70	0	0	0	0	0	0	0	0	4	1	0	1	0	0
78	1	1	1	2	1	2	0	4	0	0	0	0	0	0	0	0	0	0	0	0	0	0	0	0	0	0	0	0	0	0	0	130	80	110	70	0	0	0	0	0	0	4	1	0	0	0	1	0	0
63	1	0	3	2	1	0	0	0	0	0	0	0	0	0	0	0	0	0	0	0	0	0	0	0	0	0	0	0	0	0	0	110	70	120	80	0	0	0	0	0	0	0	0	4	1	1	1	0	0
65	1	0	5	2	1	2	0	5	0	0	0	0	0	0	0	0	0	0	0	0	0	0	0	1	0	0	0	0	0	0	0	180	90	140	80	0	0	0	0	0	0	0	0	1	0	0	1	0	0
49	1	1	4	2	2	2	0	1	0	0	0	0	0	0	0	0	0	0	0	0	0	0	0	0	0	0	0	0	0	0	0	130	90	130	80	0	0	0	0	0	0	0	0	3	2	0	1	0	0
80	0	0	0	0	0	2	0	4	0	0	0	0	0	0	0	0	0	0	0	0	0	0	0	1	0	0	0	0	0	0	0	154	88	150	90	0	0	0	0	0	0	0	0	4	0	0	1	0	0
43	1	2	2	2	1	0	0	0	0	0	0	0	0	0	0	0	0	0	0	0	0	0	0	0	0	0	0	0	0	0	0	107	71	100	70	0	0	0	0	0	0	1	1	0	0	0	0	0	0
65	1	0	0	0	0	3	0	7	0	0	0	0	0	0	0	0	0	0	0	0	0	0	0	0	0	0	0	0	0	0	0	230	120	180	100	0	0	0	0	0	0	1	1	0	0	0	1	0	0
64	1	1	4	2	1	0	0	0	0	0	0	0	0	0	0	0	0	0	0	0	0	0	0	0	0	0	0	0	0	0	0	133	79	130	80	0	0	0	0	0	0	1	1	0	0	0	1	0	0
71	0	0	6	2	1	2	0	7	0	0	0	0	0	0	0	0	0	0	0	0	0	0	0	0	0	1	0	0	0	0	0	147	86	140	90	0	0	0	0	0	0	0	1	1	0	0	1	0	0
71	1	0	0	0	2	2	0	4	0	0	0	0	0	0	0	0	0	0	0	0	0	0	0	0	0	0	0	0	0	0	0	152	88	150	90	0	0	0	0	0	0	1	1	0	0	0	1	0	0
73	1	1	5	2	1	2	0	6	2	0	0	0	0	0	0	0	0	0	0	0	0	0	0	0	0	0	0	0	0	0	0	178	100	190	110	0	0	0	0	0	0	1	1	0	0	0	1	0	0
60	0	0	6	2	1	2	0	5	0	0	0	0	0	0	0	0	0	0	0	0	0	0	0	0	0	0	0	0	0	0	0	180	100	160	100	0	0	0	0	0	0	4	2	0	0	0	0	0	0
71	0	0	0	0	0	2	0	5	0	0	0	0	0	0	0	0	0	0	0	0	0	0	0	1	0	0	0	0	0	0	0	138	82	130	80	0	0	0	0	0	0	1	1	0	0	0	1	0	0
52	1	3	5	2	1	2	0	6	0	0	0	0	0	0	0	0	0	0	0	0	0	0	0	0	0	0	0	0	0	0	0	130	80	130	80	0	0	0	0	0	0	0	0	2	1	0	1	0	0
76	1	1	0	0	0	2	0	6	0	0	0	0	0	0	0	0	0	0	0	0	0	0	0	0	0	0	0	0	0	0	0	140	90	130	70	0	0	0	0	0	0	1	1	0	0	0	1	0	0
53	1	0	5	2	1	0	0	0	0	0	0	0	0	0	0	0	0	0	0	0	0	0	0	0	0	0	0	0	0	0	0	160	90	140	90	0	0	0	0	0	0	4	1	1	0	0	0	0	0
61	1	1	6	2	2	0	0	0	0	0	0	0	0	0	0	0	0	0	0	0	0	0	0	0	0	0	0	0	0	0	0	110	70	100	70	0	0	0	0	0	0	0	1	0	0	0	1	0	0
64	0	0	6	2	2	2	0	7	0	0	0	0	0	0	0	0	0	0	0	0	0	0	0	0	0	0	0	0	0	0	0	140	90	140	90	0	0	0	0	0	0	1	0	0	0	0	1	0	0
67	1	2	6	2	1	3	0	7	0	0	0	0	0	0	0	0	0	0	0	0	0	0	0	0	0	0	1	0	0	0	0	170	90	160	100	0	0	0	0	0	0	1	1	0	0	0	1	0	0
75	0	0	4	2	1	2	0	1	1	0	0	0	0	0	0	0	0	0	0	0	0	0	0	0	0	0	0	0	0	0	0	147	85	140	90	0	0	0	0	0	0	0	0	4	0	0	0	0	0
71	1	1	1	1	1	0	1	7	0	0	0	0	0	0	0	0	0	0	0	0	0	0	0	1	0	0	0	0	0	0	0	142	83	130	80	0	0	0	0	0	0	1	1	0	0	0	1	0	0
62	1	1	0	0	0	2	0	5	0	0	0	0	0	0	0	0	0	0	0	0	0	0	0	0	0	0	0	0	0	0	0	156	90	160	90	0	0	0	0	0	0	0	1	2	1	0	1	0	0
65	1	1	1	2	1	0	0	0	0	1	0	0	0	0	0	0	0	0	0	0	0	0	0	0	0	0	0	0	0	0	0	128	78	130	80	0	0	1	0	0	0	2	1	0	0	0	0	1	0
68	0	1	2	2	2	2	0	5	0	1	0	0	0	0	0	0	0	0	0	0	0	0	0	0	0	0	0	0	0	0	0	158	90	170	90	0	0	1	0	0	0	0	1	1	0	0	1	0	0
55	1	0	0	0	2	0	0	0	0	0	0	0	0	0	0	0	0	0	0	0	0	0	0	0	0	0	0	0	0	0	0	138	84	140	90	0	0	0	0	0	0	4	1	0	0	0	1	0	0
65	0	0	0	0	0	2	0	6	0	0	0	0	0	0	0	0	0	0	0	0	0	0	0	1	0	0	0	0	0	0	0	166	95	170	100	0	0	0	0	0	0	0	0	1	0	0	0	0	0
76	1	0	4	2	2	2	0	5	2	0	0	0	0	1	0	0	0	0	0	0	0	0	0	0	0	0	0	0	0	0	0	140	70	140	70	0	0	1	0	0	0	1	1	0	0	0	1	0	0
57	1	1	3	2	2	2	0	4	0	0	0	0	0	0	0	0	0	0	0	0	0	0	0	0	0	0	0	0	0	0	0	160	90	140	80	0	0	0	0	0	0	1	1	0	0	0	1	0	0
66	0	1	3	2	1	0	1	6	0	0	0	0	0	0	0	0	0	0	0	0	0	0	0	1	1	0	0	0	0	0	0	178	98	200	100	0	0	0	0	0	0	4	1	0	0	0	1	0	0
64	0	1	0	0	2	2	0	7	0	0	0	0	0	0	0	0	0	0	0	0	0	0	0	0	0	0	0	0	0	0	0	142	83	140	80	0	0	0	0	0	0	1	1	0	0	0	0	0	0
88	0	0	6	2	2	2	0	6	0	0	0	0	0	0	0	0	0	0	0	0	0	0	0	0	0	0	1	0	0	0	0	149	85	140	90	0	0	0	0	0	0	4	0	0	0	0	0	0	0
79	0	1	1	2	2	3	0	6	0	0	0	0	0	0	0	0	0	0	0	0	0	0	0	0	0	0	0	0	0	0	0	144	82	130	80	0	0	0	0	0	0	1	1	0	0	0	1	0	0
44	1	0	1	2	2	2	0	4	0	0	0	0	0	0	0	0	0	0	0	0	0	0	0	0	0	0	0	0	0	0	0	149	88	160	90	0	0	0	0	0	0	1	0	0	0	0	1	0	0
42	1	1	1	2	2	0	0	0	0	0	0	0	0	0	0	0	0	0	0	0	0	0	0	0	0	0	0	0	0	0	0	112	75	110	80	0	0	0	0	0	0	2	0	0	0	0	1	0	0
63	1	0	0	0	2	0	1	7	0	0	0	0	0	0	0	0	0	0	0	0	0	0	0	1	0	0	1	0	0	0	0	143	87	130	90	0	0	0	0	0	0	0	0	1	0	0	1	0	0
55	1	1	1	2	1	0	0	0	0	0	0	0	0	0	0	0	0	0	0	0	0	0	0	0	0	0	0	0	0	0	0	114	72	110	70	0	0	0	0	0	0	0	1	2	0	0	1	0	0
72	1	0	6	2	2	2	0	5	0	0	0	0	0	0	0	0	0	0	0	0	0	0	0	0	0	0	0	0	0	0	0	145	82	140	80	0	0	0	0	0	0	0	0	2	0	0	1	0	0
58	1	0	0	0	0	0	0	0	0	0	0	0	0	0	0	0	0	0	0	0	0	0	0	0	0	0	0	0	0	0	0	150	80	140	80	0	0	0	0	0	0	1	0	0	0	0	1	0	0
78	0	3	1	2	1	2	0	6	2	0	0	0	0	0	0	0	0	0	0	0	0	0	0	0	0	0	1	0	0	0	0	184	105	200	120	0	0	0	0	0	0	1	0	0	0	0	0	0	0
45	1	0	0	0	0	2	0	7	0	0	0	0	0	0	0	0	0	0	0	0	0	0	0	0	0	0	0	0	0	0	0	140	90	140	80	0	0	0	0	0	0	0	1	2	0	0	1	0	0
64	1	2	6	2	2	2	0	5	1	0	0	0	0	0	0	0	0	0	0	0	0	0	0	0	0	0	0	0	0	0	0	146	85	144	87	0	0	0	0	0	0	1	1	0	0	0	1	0	0
63	1	0	0	0	0	0	0	0	0	0	0	0	0	0	0	0	0	0	0	0	0	0	0	0	0	0	1	0	0	0	0	122	73	110	70	0	0	0	0	0	0	4	0	0	0	0	1	0	0
52	0	0	5	2	1	2	0	7	0	0	0	0	0	0	0	0	0	0	0	0	0	0	0	0	0	1	0	0	0	0	0	136	81	130	80	0	0	0	0	0	0	0	1	2	0	0	1	0	0
43	1	0	0	0	2	1	0	5	0	0	0	0	0	0	0	0	0	0	0	0	0	0	0	0	0	0	0	0	0	0	0	141	90	160	100	0	0	0	0	0	0	0	1	4	3	0	1	0	0
51	1	0	0	0	0	0	0	0	0	0	0	0	0	0	0	0	0	0	0	0	0	0	0	0	0	0	0	0	0	0	0	114	75	110	80	0	0	0	0	0	0	4	2	0	0	0	1	0	0
87	0	0	4	2	2	3	0	8	1	0	0	0	0	0	0	0	0	0	0	0	0	0	0	0	0	0	0	0	0	0	0	200	100	160	80	0	0	0	0	0	0	1	1	0	0	0	1	0	0
57	0	0	0	0	2	0	0	0	0	0	0	0	0	0	0	0	0	0	0	0	0	0	0	1	1	0	0	0	0	0	0	147	87	160	90	0	0	0	0	0	0	0	0	1	1	0	1	0	0
62	0	0	5	2	1	0	0	0	0	0	0	0	1	0	0	0	0	0	0	0	0	0	0	0	0	0	0	0	0	0	0	116	68	105	60	0	0	0	0	0	0	0	1	1	0	0	1	0	0
72	0	1	6	2	1	0	1	7	0	0	0	0	0	0	0	0	0	0	0	0	0	0	0	0	0	0	0	0	0	0	0	149	86	140	90	0	0	0	0	0	0	1	1	0	0	0	1	0	0
61	0	0	0	0	0	2	0	7	0	0	0	0	0	0	0	0	0	0	0	0	0	0	0	0	0	0	0	0	0	0	0	156	90	150	90	0	0	0	0	0	0	1	1	0	0	0	1	0	0
45	1	0	0	0	0	0	0	0	0	0	0	0	0	0	0	0	0	0	0	0	0	0	0	0	0	0	0	0	0	0	0	121	78	120	80	0	0	0	0	0	0	0	0	1	0	0	1	0	0
74	0	0	6	2	1	2	0	7	0	0	0	0	0	0	0	0	0	0	0	0	0	0	0	0	0	0	0	0	0	0	0	183	98	200	100	0	0	0	0	0	0	1	1	0	0	0	1	0	0
76	0	0	0	0	2	2	0	7	0	0	0	0	0	0	0	0	0	0	0	0	0	0	0	0	0	0	1	0	0	0	0	164	94	160	100	0	0	0	0	0	0	4	1	0	0	0	0	0	0
49	1	0	4	2	1	2	0	3	0	0	0	0	0	0	0	0	0	0	0	0	0	0	0	0	0	0	1	0	0	0	0	136	84	130	90	0	0	0	0	0	0	4	1	0	0	0	1	0	0
37	1	0	0	0	0	0	0	0	0	0	0	0	0	0	0	0	0	0	0	0	0	0	0	0	0	0	0	0	0	0	0	180	80	180	120	1	0	0	0	0	0	1	1	1	0	0	0	0	0
60	1	0	0	0	2	2	0	6	0	0	0	0	0	0	0	0	0	0	0	0	0	0	0	0	0	0	0	0	0	0	0	169	97	180	100	0	0	0	0	0	0	4	0	0	0	0	1	0	0
62	1	0	0	0	0	0	0	0	0	0	0	0	0	0	0	0	0	0	0	0	0	0	0	0	0	0	0	0	0	0	0	144	89	170	100	0	0	0	0	0	0	0	0	3	1	0	1	0	0
92	1	0	6	2	1	2	0	7	0	0	0	0	0	0	0	0	0	0	0	0	0	0	0	0	0	0	0	0	0	0	0	160	90	140	80	0	0	0	0	0	0	0	0	4	1	0	1	0	0
71	0	3	0	0	2	2	0	7	0	0	0	0	0	0	0	0	0	0	0	0	0	0	0	0	0	0	0	0	0	0	0	155	90	150	90	0	0	0	0	0	0	0	0	3	0	0	0	0	0
26	0	0	0	0	0	0	0	0	0	0	0	0	0	0	0	0	0	0	0	0	0	0	0	0	0	0	0	0	0	0	0	103	73	120	80	0	0	0	0	0	0	4	2	0	0	0	0	0	0
67	1	1	6	2	1	2	0	7	0	0	0	0	0	0	0	0	0	0	0	0	0	0	0	0	0	0	1	0	0	0	0	157	92	160	100	0	0	0	0	0	0	0	1	1	0	0	1	0	0
52	1	0	0	0	2	0	0	0	0	0	0	0	0	0	0	0	0	0	0	0	0	0	0	0	0	0	1	0	0	0	0	134	80	130	80	0	0	0	0	0	0	0	1	3	0	0	1	0	0
59	1	0	0	0	0	0	0	0	0	0	0	0	0	0	0	0	0	0	0	0	0	0	0	0	0	0	0	0	0	0	0	111	71	110	70	0	0	0	0	0	0	0	1	2	2	0	1	0	0
59	1	3	2	2	2	3	0	7	0	0	0	0	0	0	0	0	0	0	0	0	0	0	0	0	0	0	0	0	0	0	0	167	99	180	110	0	0	0	0	0	0	1	1	4	0	0	1	0	0
70	0	1	6	2	1	3	0	7	2	0	0	0	0	0	0	0	0	0	0	0	0	0	0	0	0	0	0	0	0	0	0	132	79	120	80	0	0	0	0	0	0	4	1	0	0	0	0	0	0
55	1	0	1	2	1	2	0	4	0	0	0	0	0	0	0	0	0	0	0	0	0	0	0	0	0	0	0	0	0	0	0	135	84	120	90	1	0	0	0	0	0	1	0	0	0	0	1	0	0
61	0	2	2	2	1	2	0	5	0	0	0	0	0	0	0	0	0	0	0	0	0	0	0	0	0	0	0	0	0	0	0	142	85	140	90	0	0	0	0	0	0	1	1	0	0	0	1	0	0
57	1	0	6	2	1	2	0	4	0	0	0	0	0	0	0	0	0	0	0	0	0	0	0	0	0	0	0	1	0	0	0	120	80	140	70	0	0	0	0	0	0	1	1	0	0	0	1	0	0
57	1	0	0	0	0	0	0	0	0	0	0	0	0	0	0	0	0	0	0	0	0	0	0	0	0	0	0	0	0	0	0	125	80	140	90	0	0	0	0	0	0	0	1	2	0	0	1	0	0
53	0	0	2	2	1	3	0	1	0	0	0	0	0	0	0	0	0	0	0	0	0	0	0	0	0	0	0	0	0	0	0	131	80	130	80	0	0	0	0	0	0	1	1	1	0	0	1	0	0
62	1	3	6	2	1	0	0	0	0	0	0	0	0	0	0	0	0	0	0	0	0	0	0	0	0	0	0	0	0	0	0	112	67	100	60	0	0	0	0	0	0	0	0	1	0	0	1	0	0
64	1	1	6	2	2	2	0	7	0	1	0	0	0	0	0	0	0	0	0	0	0	0	0	0	0	0	0	0	0	0	0	135	79	120	80	0	0	0	0	0	0	0	0	1	0	0	1	0	0
53	1	0	0	0	2	2	0	6	0	0	0	0	0	0	0	0	0	0	0	0	0	0	0	0	0	0	0	0	0	0	0	140	80	140	100	0	0	0	0	0	0	1	1	0	0	0	1	0	0
67	0	0	0	0	0	2	0	1	0	0	0	0	0	0	0	0	0	0	0	0	0	0	0	0	0	0	0	0	0	0	0	183	104	200	120	0	0	1	0	0	0	1	1	0	0	0	0	1	0
39	1	0	0	0	0	0	0	0	0	0	0	1	0	0	0	0	0	0	0	0	0	0	0	0	0	0	0	0	0	0	0	127	82	140	90	0	0	0	0	0	0	4	1	0	0	0	1	0	0
76	0	1	1	3	1	2	0	2	0	0	0	0	0	0	0	0	0	0	0	0	0	0	0	0	0	0	0	0	0	0	0	159	92	160	100	0	0	0	0	0	0	1	1	0	0	0	1	0	0
64	0	0	0	0	2	2	0	1	1	0	0	0	0	0	0	0	0	0	0	0	0	0	0	0	0	0	0	0	0	0	0	139	82	135	84	0	0	0	0	0	0	1	1	0	0	0	1	0	0
70	1	0	6	2	2	0	0	0	0	0	0	0	0	0	0	0	0	0	0	0	0	0	0	0	0	0	1	0	0	0	0	110	70	130	80	0	0	0	0	0	0	4	2	3	0	0	0	0	0
55	1	0	0	0	0	0	0	0	0	0	0	0	0	0	0	0	0	0	0	0	0	0	0	0	0	0	0	0	0	0	1	133	83	130	90	0	0	0	0	0	0	0	1	2	0	0	1	0	0
52	1	0	0	0	0	2	0	5	0	0	0	0	0	0	0	0	0	0	0	0	0	0	0	0	0	0	0	0	0	0	0	171	100	180	110	0	0	0	0	0	0	1	1	0	0	0	0	0	0
63	1	0	3	2	1	0	0	0	0	0	0	0	0	0	0	0	0	0	0	0	0	0	0	0	0	0	0	0	0	0	0	122	76	120	80	0	0	0	0	0	0	4	1	0	0	0	1	0	0
61	1	0	0	0	0	2	0	5	0	0	0	0	0	0	0	0	0	0	0	0	0	0	0	1	0	0	0	0	0	0	0	139	82	130	80	0	0	0	0	0	0	0	0	1	0	0	1	0	0
70	1	0	6	2	2	3	0	7	0	0	0	0	0	0	0	0	0	0	0	0	0	0	0	0	0	0	0	0	0	0	1	165	91	170	90	0	0	0	0	0	0	1	0	0	0	0	1	0	0
75	0	0	6	2	1	0	0	0	0	0	0	0	0	1	0	0	0	0	0	0	0	0	0	0	0	0	1	0	0	0	0	50	10	130	80	0	1	0	0	1	0	4	2	0	0	0	0	1	0
63	1	0	0	0	0	2	0	7	0	0	0	0	0	0	0	0	0	0	0	0	0	0	0	0	0	0	0	0	0	0	0	160	100	130	80	0	0	0	0	0	0	0	0	1	0	0	1	0	0
64	0	3	4	2	1	2	0	5	0	0	0	0	0	0	0	0	0	0	0	0	0	0	0	0	0	0	0	0	0	0	0	100	60	120	80	0	0	0	0	0	0	0	0	2	0	0	1	0	0
54	0	0	6	2	2	2	0	7	0	0	0	0	0	0	0	0	0	0	0	0	0	0	0	1	0	0	0	0	0	0	0	135	81	130	80	0	0	0	0	0	0	1	1	0	0	0	1	0	0
41	1	0	0	0	0	0	0	0	0	0	0	0	0	0	0	0	0	0	0	0	0	0	0	0	0	0	0	0	0	0	0	127	80	130	80	0	0	0	0	0	0	4	3	0	0	0	1	0	0
68	0	1	6	2	2	2	0	7	0	0	0	0	1	0	0	0	0	0	0	0	0	0	0	0	1	0	0	0	0	0	0	140	90	140	100	0	0	1	0	0	0	1	1	0	0	0	0	1	0
59	1	0	3	2	2	0	0	0	0	0	0	0	0	0	0	0	0	0	0	0	0	0	0	0	0	0	0	1	0	0	0	127	78	130	80	0	0	0	0	0	0	4	0	2	0	0	0	0	0
60	0	1	2	2	2	2	0	7	0	1	0	0	0	0	0	0	0	0	0	0	0	0	0	0	0	0	0	0	0	0	0	180	100	130	80	0	0	0	0	0	0	1	1	0	0	0	0	0	0
50	0	0	0	0	0	2	0	7	0	0	0	1	0	0	0	0	0	0	0	0	0	0	0	0	0	0	0	0	0	0	0	138	83	130	80	0	0	0	0	0	0	0	0	4	0	0	1	0	0
76	1	1	0	0	0	0	0	0	0	0	0	0	0	0	0	0	0	0	0	0	0	0	0	0	0	0	0	1	0	0	0	131	75	122	74	0	0	0	0	0	0	0	0	2	0	0	1	0	0
43	1	0	0	0	0	0	0	0	0	0	0	0	0	0	0	0	0	0	0	0	0	0	0	0	0	0	0	0	0	0	0	123	78	120	80	0	0	0	0	0	0	0	0	2	0	0	0	0	0
53	1	0	6	2	1	3	0	7	0	0	0	0	0	0	0	0	0	0	0	0	0	0	0	0	0	0	0	0	0	0	0	138	85	130	90	0	0	0	0	0	0	0	0	2	0	0	1	0	0
45	1	1	1	4	2	0	0	0	0	0	0	0	0	0	0	0	0	0	0	0	0	0	0	0	0	0	0	0	0	0	0	113	72	110	70	0	0	0	0	0	0	1	1	0	0	0	1	0	0
43	1	0	0	0	0	0	0	0	0	0	0	0	0	0	0	0	0	0	0	0	0	0	0	0	0	0	0	0	0	0	0	110	70	140	90	0	0	0	0	0	0	4	1	0	0	0	1	0	0
66	1	3	6	4	2	2	0	7	0	0	0	0	0	0	0	0	0	0	0	0	0	0	0	0	0	0	0	0	0	0	0	115	80	105	70	0	0	0	0	0	0	4	1	0	0	0	1	0	0
65	1	0	6	2	1	0	0	0	0	0	0	0	0	0	0	0	0	0	0	0	0	0	0	0	0	0	0	0	0	0	0	120	70	118	75	0	0	1	0	0	0	4	1	0	0	0	1	0	0
79	1	3	2	2	1	2	0	7	1	0	0	0	0	0	0	0	0	0	0	0	0	0	0	0	0	0	1	0	0	0	0	121	70	100	60	0	0	0	0	0	0	1	1	0	0	0	0	0	0
58	0	0	0	0	0	3	0	5	0	0	0	0	0	0	0	0	0	0	0	0	0	0	0	0	0	0	0	0	0	0	0	155	80	140	90	0	0	0	0	0	0	1	1	0	0	0	1	0	0
69	1	0	0	0	0	0	0	0	0	0	0	0	0	0	0	0	0	0	0	0	0	0	0	0	0	0	0	0	0	0	0	120	80	90	60	0	0	0	0	0	0	4	4	0	0	0	1	0	0
67	1	0	0	0	0	2	0	7	0	0	0	0	1	0	0	0	0	0	0	0	0	0	0	0	0	0	0	0	0	0	0	100	60	120	70	0	0	0	0	0	0	0	0	4	0	0	1	0	0
59	1	0	6	2	2	2	0	7	1	0	0	0	0	0	0	0	0	0	0	0	0	0	0	0	0	0	0	0	0	0	0	110	70	110	60	0	0	0	0	0	0	0	0	2	0	0	0	0	0
78	1	0	0	0	0	2	0	1	0	1	0	0	0	0	0	0	0	0	0	0	0	0	0	0	0	0	0	0	1	0	0	115	65	100	60	1	0	0	1	0	0	0	1	1	0	0	0	0	1
79	1	0	0	0	0	0	0	0	0	0	0	0	0	0	0	0	0	0	0	0	0	0	0	0	0	0	0	0	0	0	0	140	90	131	83	0	0	0	0	0	0	4	1	0	0	0	1	0	0
56	1	0	0	0	0	0	0	0	1	0	0	0	0	0	0	0	0	0	0	0	1	0	0	0	0	0	0	0	0	0	0	160	100	140	90	0	0	0	0	0	0	0	0	4	0	0	1	0	0
76	0	0	5	2	2	2	0	6	0	0	0	0	0	0	0	0	0	0	0	0	0	0	0	0	0	0	0	0	0	0	0	160	90	130	80	0	0	0	0	0	0	0	0	1	0	0	1	0	0
38	1	1	0	0	0	2	0	7	0	0	0	0	0	0	0	0	0	0	0	0	0	0	0	0	0	0	0	0	0	0	0	220	120	180	110	0	0	0	0	0	0	4	1	0	0	0	0	0	0
55	1	1	4	2	2	3	0	7	0	0	0	0	0	0	0	0	0	0	0	0	0	0	0	0	0	0	0	1	0	0	0	150	90	150	90	0	0	0	0	0	0	0	1	2	0	0	1	0	0
63	1	2	4	2	2	2	0	5	0	0	0	0	0	0	0	0	0	0	0	0	0	0	0	0	0	0	0	0	0	0	0	180	100	170	100	0	0	0	0	0	0	4	1	0	0	0	0	0	0
62	1	2	1	3	1	0	0	0	0	0	0	0	0	0	0	0	0	0	0	0	0	0	0	1	0	0	0	0	0	0	0	130	80	140	90	0	0	0	0	0	0	0	0	1	0	0	1	0	0
61	1	1	0	0	0	3	0	3	0	0	0	0	0	0	0	0	0	0	0	0	0	0	0	0	0	0	0	0	0	0	0	130	70	150	90	1	0	0	0	0	0	4	1	0	0	0	0	0	0
51	1	0	0	0	0	2	0	6	0	0	0	0	0	0	0	0	0	0	0	0	0	0	0	0	0	0	0	0	0	0	0	145	90	140	100	0	0	0	0	0	0	4	2	0	0	0	0	0	0
51	0	0	5	1	1	2	0	7	0	0	0	0	0	0	0	0	0	0	0	0	0	0	0	0	0	0	0	1	0	0	0	142	83	150	80	0	0	0	0	0	0	3	2	0	0	0	1	0	0
60	1	1	0	0	0	2	0	2	0	0	0	0	0	0	0	0	0	0	0	0	0	0	0	0	0	0	0	0	0	0	0	140	90	110	70	0	0	0	0	0	0	0	0	4	0	0	1	0	0
69	0	1	4	2	2	3	0	4	0	0	0	0	0	0	0	0	0	0	0	0	0	0	0	0	0	0	0	0	0	0	0	157	92	160	100	0	0	0	0	0	0	0	0	3	0	1	1	0	0
61	1	1	5	2	1	2	0	6	0	0	0	0	0	0	0	0	0	0	0	0	0	0	0	0	0	0	0	0	0	0	0	180	100	180	90	0	0	0	0	0	0	0	0	1	0	0	1	0	0
45	1	0	0	0	0	2	0	5	0	0	0	0	0	0	0	0	0	0	0	0	0	0	0	0	1	0	0	0	0	0	0	180	100	130	90	0	0	0	0	0	0	0	0	3	0	0	1	0	0
60	1	0	0	0	0	0	0	0	0	0	0	0	0	0	0	0	0	0	0	0	0	0	0	0	0	0	0	0	0	0	0	90	60	130	80	0	0	0	0	0	0	1	1	0	0	0	1	0	0
50	1	0	6	2	1	2	0	4	0	1	0	0	0	0	0	0	0	0	0	0	0	0	0	0	0	0	0	0	0	0	0	140	90	140	80	0	0	0	0	0	0	0	0	2	0	0	1	0	0
67	0	2	0	0	0	0	0	0	0	0	0	0	0	0	0	0	0	0	0	0	0	0	0	0	0	0	0	0	0	0	0	140	90	130	80	1	0	0	0	0	0	0	0	2	0	0	0	0	0
76	0	0	3	2	1	2	0	1	0	1	0	0	0	0	0	0	0	0	0	0	0	0	0	0	0	0	0	0	0	0	0	135	82	120	90	0	0	0	0	0	0	0	1	3	1	0	1	0	0
57	1	1	6	1	1	0	0	0	0	0	0	1	0	0	0	0	0	0	0	0	0	0	0	0	0	0	0	0	0	0	0	125	76	130	80	0	0	0	0	0	0	0	0	4	3	0	0	1	0
41	1	0	1	1	2	2	0	1	0	0	0	0	0	0	0	0	0	0	0	0	0	0	0	0	0	0	0	0	0	0	0	148	88	160	90	0	0	0	0	0	0	1	1	0	0	0	1	0	0
60	1	0	0	0	0	0	0	0	0	0	0	0	0	0	0	0	0	0	0	0	0	0	0	0	0	0	0	0	0	0	0	110	60	100	70	0	0	0	0	0	0	4	2	0	0	0	1	0	0
70	0	0	6	2	2	2	0	7	0	0	0	0	0	0	0	0	0	0	0	0	0	0	0	0	0	0	0	1	0	0	0	103	62	80	50	0	0	0	0	0	0	0	0	3	0	0	1	0	0
66	0	0	3	3	2	2	0	7	0	0	0	0	0	0	0	0	0	0	0	0	0	0	0	1	0	0	0	1	0	0	0	135	81	130	80	1	0	0	0	0	0	0	0	3	2	0	1	0	0
63	0	0	0	0	0	2	0	3	0	0	0	0	0	0	0	0	0	0	0	0	0	0	0	0	0	0	0	0	0	0	0	110	70	130	80	0	0	0	0	0	0	1	1	0	0	0	1	0	0
65	1	0	0	0	2	0	0	0	0	0	0	0	0	0	0	0	0	0	0	0	0	0	0	0	0	0	0	0	0	0	0	127	78	120	80	0	0	0	0	0	0	4	1	0	0	0	1	0	0
49	0	0	0	0	2	0	0	0	0	0	0	0	0	0	0	0	0	0	0	0	0	0	0	0	0	0	0	0	0	0	0	125	75	120	70	0	0	0	0	0	0	0	1	0	3	0	1	0	0
68	1	0	5	2	1	0	0	0	0	1	0	0	0	0	0	0	0	0	0	0	0	0	0	0	0	0	0	0	0	0	0	100	60	130	80	0	0	1	0	0	0	0	0	2	0	0	0	0	0
74	0	0	6	2	1	2	0	7	0	0	0	0	0	0	0	0	0	0	0	0	0	0	0	0	0	0	0	0	0	0	0	140	80	150	100	1	0	1	0	0	0	0	0	4	0	0	0	1	0
63	1	0	0	0	0	0	0	0	0	0	0	0	0	0	0	0	0	0	0	0	0	0	0	0	0	0	0	0	0	0	0	110	70	120	80	0	0	0	0	0	0	0	1	4	1	0	1	0	0
66	1	0	0	0	2	2	0	5	0	0	0	0	0	0	0	0	0	0	0	0	0	0	0	0	0	0	0	0	0	0	0	143	83	134	82	0	0	0	0	0	0	0	1	0	4	0	1	0	0
77	1	0	2	1	1	0	0	0	0	0	0	0	0	0	0	0	0	0	0	0	0	0	0	0	0	0	0	1	0	0	0	128	74	120	73	0	0	0	0	0	0	0	0	3	0	0	1	0	0
48	1	1	2	2	1	0	0	0	0	0	0	0	0	0	0	0	0	0	0	0	0	0	0	0	0	0	0	0	0	0	0	124	77	130	80	0	0	0	0	0	0	4	3	0	0	0	1	0	0
58	0	1	6	2	2	2	0	7	0	0	0	0	0	0	0	0	0	0	0	0	0	0	0	0	0	0	0	1	0	0	0	170	90	160	100	0	0	0	0	0	0	1	1	0	0	0	1	0	0
58	0	1	6	2	2	2	0	6	0	0	0	0	0	0	0	0	0	0	0	0	0	0	0	0	0	0	0	0	0	0	0	144	85	143	88	0	0	0	0	0	0	1	1	2	0	0	0	0	0
74	1	3	2	2	2	0	0	0	0	0	0	1	0	0	0	0	0	0	0	0	0	0	0	0	0	0	0	1	0	0	0	120	80	110	70	1	0	0	0	1	0	0	0	1	0	0	1	0	0
78	0	0	0	0	0	0	0	0	0	0	0	0	0	0	0	0	0	0	1	0	0	0	0	0	0	0	0	0	0	0	0	170	120	80	50	0	0	1	0	0	1	4	1	4	0	0	0	1	0
62	1	1	2	2	1	0	0	0	0	1	0	0	0	0	0	0	0	0	1	0	0	0	0	0	0	0	0	0	0	0	0	100	70	120	80	0	0	0	0	0	0	4	1	0	1	0	0	0	0
52	1	0	0	0	2	0	0	0	0	0	0	0	0	0	0	0	0	0	0	0	0	0	0	0	0	0	0	1	0	0	0	91	57	70	40	0	0	0	0	0	0	4	1	0	0	0	1	0	0
46	1	0	0	0	0	3	0	5	0	0	0	0	0	0	0	0	0	0	0	0	0	0	0	0	0	0	0	0	0	0	0	109	69	90	60	0	0	1	0	0	1	0	0	4	3	0	0	0	0
54	0	0	6	2	1	0	0	0	0	0	0	0	0	0	0	0	0	0	0	0	0	0	0	0	0	0	0	0	0	0	0	132	79	129	83	0	0	0	0	0	0	4	1	0	0	0	1	0	0
62	0	1	2	2	2	2	0	2	0	0	0	0	0	0	0	0	0	0	0	0	0	0	0	1	0	0	0	0	0	0	0	140	83	137	86	0	0	0	0	0	0	4	1	0	0	0	1	0	0
53	1	0	3	2	1	0	0	0	0	0	0	0	0	0	0	0	0	0	0	0	0	0	0	0	0	0	0	0	0	0	0	110	72	110	70	0	0	0	0	0	0	4	1	0	0	0	1	0	0
66	0	0	1	2	1	0	0	0	1	0	0	0	0	0	0	0	0	0	0	0	0	0	0	0	0	0	0	0	0	0	0	113	68	100	60	0	0	0	0	0	0	1	1	0	0	0	1	0	0
92	0	0	4	2	1	3	0	7	0	0	0	0	0	0	0	0	0	0	0	0	0	0	0	0	0	0	0	0	0	0	0	148	84	140	90	0	0	0	0	0	0	1	0	0	0	0	0	0	0
59	0	0	2	1	1	2	0	7	0	0	0	0	0	0	0	0	0	0	0	0	0	0	0	0	0	0	0	0	0	0	0	120	100	150	90	1	0	1	0	0	0	4	0	0	0	0	1	0	0
70	0	0	0	0	0	3	0	7	0	0	0	0	1	0	0	0	0	0	0	0	0	0	0	0	0	0	0	0	0	0	0	148	84	140	80	0	0	0	0	0	0	0	1	1	0	0	1	0	0
68	1	3	6	2	2	2	0	7	0	0	0	0	1	0	0	0	0	0	0	0	0	0	0	0	0	0	0	0	0	0	0	138	81	120	80	0	0	0	0	0	0	1	1	0	0	0	1	0	0
72	0	0	0	0	0	2	0	1	0	0	0	0	0	0	0	0	0	0	0	0	0	0	0	0	0	0	0	0	0	0	0	155	91	170	100	0	0	0	0	0	0	0	0	3	0	0	1	0	0
66	1	1	2	2	1	2	0	7	0	0	0	0	0	0	0	0	0	0	0	0	0	0	0	1	0	0	0	1	0	0	0	149	86	143	86	0	0	0	0	0	0	0	1	2	0	0	0	0	0
67	0	0	0	0	0	2	0	5	0	0	0	0	0	0	0	0	0	0	0	0	0	0	0	0	0	0	0	0	0	0	0	135	81	130	80	0	0	0	0	0	0	4	1	0	0	0	1	0	0
60	1	0	3	2	2	2	0	7	0	1	0	0	0	0	0	0	0	0	0	0	0	0	0	0	0	0	0	0	1	0	0	132	79	120	80	0	0	0	0	0	0	1	1	0	0	0	1	0	0
61	1	2	3	2	2	0	0	0	2	0	0	0	1	0	0	0	0	0	0	0	0	0	0	0	0	0	0	0	0	0	1	111	67	100	60	0	0	1	0	0	0	1	1	0	0	0	0	1	0
53	1	0	3	1	2	0	0	0	0	0	0	0	0	0	0	0	0	0	0	0	0	0	0	0	0	0	0	1	0	0	0	128	82	130	90	0	0	0	0	0	0	1	1	0	0	0	1	0	0
63	1	1	4	2	1	0	0	0	0	0	0	0	0	0	0	0	0	0	0	0	0	0	0	0	0	0	0	0	0	0	0	100	70	80	50	0	0	0	0	0	0	2	1	1	0	0	1	0	0
64	0	1	5	2	2	2	0	7	0	0	0	0	0	0	0	0	0	0	0	0	0	0	0	0	0	0	0	0	0	0	0	210	100	230	130	0	0	0	0	0	0	4	1	0	0	0	1	0	0
59	0	0	0	0	0	3	0	7	0	0	0	0	0	0	0	0	0	0	0	0	0	0	0	0	0	0	0	0	0	0	0	145	85	130	80	0	0	0	0	0	0	0	0	1	3	0	1	0	0
84	0	0	0	0	0	2	0	3	0	0	0	0	0	0	0	0	0	0	0	0	0	0	0	0	0	0	0	0	0	0	0	155	88	150	90	0	0	0	0	0	0	4	1	0	0	0	1	0	0
55	1	2	2	2	2	2	0	7	0	0	0	0	0	0	0	0	0	0	0	0	0	0	0	0	1	0	0	0	0	0	0	157	94	160	100	0	0	0	0	0	0	1	1	0	0	0	1	0	0
62	1	0	0	0	0	0	0	0	0	0	0	0	0	0	0	0	0	0	0	0	0	0	0	0	0	0	0	0	0	0	0	120	80	130	80	0	0	0	0	0	0	4	1	0	0	0	1	0	0
62	0	0	1	2	1	2	0	6	0	0	0	0	0	0	0	0	0	0	0	0	0	0	0	0	0	0	0	0	1	0	0	151	88	160	90	0	0	1	0	0	0	4	1	1	0	0	0	1	0
52	1	3	0	0	0	2	0	7	0	0	0	0	0	0	1	0	0	0	1	0	0	0	0	0	0	0	0	0	0	0	0	190	90	140	80	0	0	0	0	0	0	3	1	0	0	0	0	0	0
59	1	0	0	0	2	2	0	4	0	0	0	0	0	0	0	0	0	0	0	0	0	0	0	0	0	0	0	0	0	0	0	141	83	140	80	0	0	0	0	0	0	4	2	0	0	0	1	0	0
74	1	2	6	2	1	2	0	6	0	0	0	0	0	0	0	0	0	0	0	0	0	0	0	0	0	0	0	0	0	0	0	164	90	160	90	0	0	0	0	0	0	2	2	0	0	0	0	0	0
60	1	2	5	3	1	0	0	0	0	0	0	0	0	0	0	0	0	0	0	0	0	0	0	0	0	0	0	0	0	0	0	117	78	110	90	0	0	0	0	0	0	0	0	2	0	0	1	0	0
69	0	0	1	2	2	2	0	7	0	0	0	0	0	0	0	0	0	0	0	0	0	0	0	1	0	0	0	0	0	0	0	133	74	120	60	0	0	0	0	0	0	2	1	1	1	0	0	0	0
70	1	0	4	2	1	2	0	3	0	0	0	0	0	0	0	0	0	0	0	0	0	0	0	0	0	0	0	0	0	0	1	176	96	200	100	0	0	0	0	0	0	1	1	1	1	0	1	0	0
62	0	1	1	2	1	2	0	7	0	0	0	0	0	0	0	0	0	0	0	0	0	0	0	1	0	0	0	0	0	0	0	145	84	140	80	0	0	0	0	0	0	2	2	0	0	0	1	0	0
64	1	0	3	2	2	0	0	0	0	0	0	0	0	0	0	0	0	0	0	0	0	0	0	0	0	0	0	1	0	0	0	120	76	110	80	0	0	0	0	0	0	4	1	0	0	0	1	0	0
65	1	2	5	2	2	2	0	5	0	0	0	0	0	0	0	0	0	0	0	0	0	0	0	1	0	0	0	0	0	0	0	160	90	140	90	0	0	0	0	0	0	0	0	4	0	0	1	0	0
61	1	0	6	2	1	2	0	6	0	0	0	0	0	0	0	0	0	0	0	0	0	0	0	0	0	0	0	1	0	0	0	140	81	140	80	0	0	0	0	0	0	4	1	0	0	0	1	0	0
67	0	0	6	2	2	2	0	6	0	0	0	0	0	0	0	0	0	0	0	0	0	0	0	0	0	0	0	1	0	0	0	140	80	150	90	0	0	0	0	0	0	1	1	4	0	0	1	0	0
62	0	2	6	2	1	2	0	7	0	0	0	1	0	0	0	0	0	0	0	0	0	0	0	1	0	0	0	0	0	0	0	126	76	110	70	0	0	0	0	0	0	2	2	0	0	0	1	0	0
62	0	0	2	1	1	2	0	7	0	0	0	0	0	0	0	0	0	0	0	0	0	0	0	0	0	0	0	0	0	0	0	125	76	110	70	0	0	0	0	0	0	0	1	4	0	1	1	0	0
62	0	0	3	2	1	0	0	0	0	0	0	0	0	0	0	0	0	0	0	0	0	0	0	0	0	0	0	1	0	0	0	132	79	140	80	0	0	0	0	0	0	1	0	1	0	0	1	0	0
54	0	0	0	0	0	2	0	7	0	0	0	0	0	0	0	0	0	0	0	0	0	0	0	0	0	0	0	0	0	0	0	137	83	130	80	0	0	0	0	0	0	0	0	4	2	0	1	0	0
66	1	0	1	2	1	2	0	7	0	0	0	0	0	0	0	0	0	0	0	0	0	0	0	0	0	0	0	0	0	0	0	127	76	110	70	0	0	0	0	0	0	4	2	0	0	0	1	0	0
79	1	1	1	2	1	2	0	5	0	0	0	0	0	0	0	0	0	0	0	0	0	0	0	0	0	0	0	1	0	0	0	148	82	140	80	0	0	0	0	0	0	1	1	4	0	0	1	0	0
75	0	1	6	2	2	2	0	7	0	0	0	0	0	0	0	0	0	0	0	0	0	0	0	0	0	0	0	0	0	0	0	146	85	130	90	0	0	0	0	0	0	1	1	0	0	0	0	0	0
54	1	0	2	2	1	2	0	7	0	0	0	0	0	0	0	0	0	0	0	0	0	0	0	0	0	0	0	0	0	0	0	184	101	210	100	0	0	0	0	0	0	0	0	1	1	0	0	0	0
52	1	0	1	2	1	2	0	4	0	0	0	0	0	0	0	0	0	0	0	0	0	0	0	0	0	0	0	0	0	0	0	126	76	110	70	0	0	0	0	0	0	0	1	0	1	0	1	0	0
43	1	0	2	1	2	0	0	0	0	0	0	0	0	0	0	0	0	0	0	0	0	0	0	0	0	0	0	0	0	0	0	125	78	120	80	0	0	0	0	0	0	1	1	0	0	0	1	0	0
68	0	3	0	0	0	2	0	6	0	0	0	0	1	0	0	0	0	0	0	0	0	0	0	0	0	0	0	0	0	0	0	160	90	130	80	1	0	1	0	0	0	0	0	2	0	0	1	0	0
57	0	0	4	2	2	2	0	5	0	0	0	0	0	0	0	0	0	0	0	0	0	0	0	0	0	0	0	0	0	0	0	126	76	120	70	0	0	0	0	0	0	4	2	0	0	0	1	0	0
66	1	0	0	0	0	2	0	7	0	0	0	0	0	0	0	0	0	0	0	0	0	0	0	0	0	0	0	0	0	0	0	152	88	150	90	0	0	0	0	0	0	0	0	4	2	0	1	0	0
57	1	1	6	2	1	0	0	0	0	0	0	0	0	0	0	0	0	0	0	0	0	0	0	0	0	0	0	1	0	0	0	126	77	120	80	0	0	0	0	0	0	0	0	3	0	0	1	0	0
75	1	0	4	2	1	0	0	0	0	0	0	0	0	0	0	0	0	0	0	0	0	0	0	0	0	0	0	0	0	0	0	116	67	100	60	0	0	0	0	1	0	0	1	2	4	0	1	0	0
49	1	0	3	2	1	2	0	4	0	0	0	0	0	0	0	0	0	0	0	0	0	0	0	0	0	0	0	1	0	0	0	140	85	140	90	0	0	0	0	0	0	4	1	0	0	0	0	0	0
62	1	0	0	0	0	0	0	0	0	0	0	0	0	0	0	0	0	0	0	0	0	0	0	0	0	0	0	0	0	0	0	142	81	150	80	1	0	1	0	0	0	0	0	2	0	1	1	0	0
72	0	1	6	2	1	2	0	7	0	0	0	0	0	0	0	0	0	0	0	0	0	0	0	0	0	0	0	1	0	0	0	117	69	90	60	0	0	1	0	0	0	4	1	0	0	0	0	1	0
72	0	0	1	2	2	2	0	3	0	0	0	0	0	0	0	0	0	0	0	0	0	0	0	0	0	0	0	0	0	0	0	130	90	160	110	0	0	0	0	0	0	4	1	0	0	0	1	0	0
73	1	0	2	2	1	0	0	0	0	0	0	0	0	0	0	0	0	0	0	0	0	0	0	1	0	0	0	0	0	0	0	80	40	90	60	0	0	0	0	0	0	0	1	3	2	1	0	0	0
58	1	0	0	0	0	3	0	6	0	0	0	0	0	0	0	0	0	0	0	0	0	0	0	0	0	0	0	1	0	0	0	152	94	150	110	1	0	0	0	0	0	4	2	0	0	0	0	0	0
65	1	0	1	2	1	0	0	0	0	0	0	0	0	0	0	0	0	0	0	0	0	0	0	0	0	0	0	1	0	0	0	150	90	140	90	0	0	0	0	0	0	0	0	1	4	1	1	0	0
78	0	2	6	2	2	2	0	7	0	0	0	0	0	0	0	0	0	0	0	0	0	0	0	0	0	0	0	1	0	0	0	90	60	100	60	1	0	0	0	0	0	0	0	4	3	0	1	0	0
70	0	3	0	0	0	3	0	7	0	0	0	0	0	0	0	0	0	0	0	0	0	0	0	1	0	0	0	0	0	0	0	144	84	136	83	0	0	0	0	0	0	4	2	3	0	0	1	0	0
50	0	1	3	3	1	2	0	5	0	0	0	0	0	0	0	0	0	0	0	0	0	0	0	1	0	0	0	0	0	0	0	150	100	120	80	0	0	0	0	0	0	0	0	3	0	0	1	0	0
47	1	1	2	2	2	0	1	4	0	0	0	0	0	0	0	0	0	0	0	0	0	0	0	0	0	0	0	0	0	0	0	173	97	200	100	0	0	0	0	0	0	1	1	0	0	0	0	0	0
73	1	0	3	2	2	2	0	2	3	1	0	0	0	0	0	0	0	0	0	0	0	0	0	0	0	0	0	0	0	0	0	130	78	120	80	1	0	0	1	0	0	1	1	0	0	0	0	0	0
72	0	3	6	3	1	2	0	7	0	0	0	0	0	0	0	0	0	0	0	0	0	0	0	0	0	0	0	0	0	0	0	140	81	130	80	0	0	0	1	0	0	1	1	0	0	0	1	0	0
81	0	0	0	0	0	2	0	4	0	0	0	0	0	0	0	0	0	0	0	0	0	0	0	0	0	0	0	0	0	0	0	110	80	110	70	0	0	0	0	0	0	3	1	0	0	0	1	0	0
48	1	2	6	2	1	0	0	0	0	0	0	0	0	0	0	0	0	0	0	0	0	0	0	0	0	0	0	0	0	0	0	113	74	110	80	0	0	0	0	0	0	0	0	2	0	0	0	0	0
83	1	0	5	2	1	0	0	0	0	1	0	0	0	0	0	0	0	0	0	0	0	0	0	0	0	0	0	1	0	0	0	136	78	140	80	0	0	0	0	0	0	0	0	2	1	0	1	0	0
69	1	3	6	3	2	2	0	7	0	0	0	0	0	0	0	0	0	0	0	0	0	0	0	0	0	0	0	1	0	0	0	160	90	148	87	0	0	0	0	0	0	0	0	2	0	0	0	0	1
50	1	1	6	2	1	0	0	0	0	0	0	0	0	0	0	0	0	0	0	0	0	0	0	0	0	0	0	0	0	0	0	95	63	80	60	0	0	0	0	1	0	0	1	1	0	0	1	0	0
44	1	3	2	2	2	2	0	1	0	0	0	0	0	0	0	0	0	0	0	0	0	0	0	0	0	0	0	1	0	0	0	170	100	180	100	1	0	0	0	0	0	1	1	0	0	0	0	0	0
43	1	2	5	2	1	0	0	0	0	0	0	0	0	0	0	0	0	0	0	0	0	0	0	0	0	0	0	0	0	0	0	128	84	130	100	0	0	0	0	0	0	0	1	0	1	0	1	0	0
70	1	1	5	1	1	2	0	6	0	0	0	0	0	0	0	0	0	0	0	0	0	0	0	1	0	0	0	0	0	0	0	166	89	180	80	0	0	0	0	0	0	0	1	0	1	0	1	0	0
77	1	0	4	2	2	2	0	5	0	0	0	0	0	0	0	0	0	0	0	0	0	0	0	0	0	0	0	0	0	0	0	133	79	130	80	0	0	0	0	0	0	4	1	0	0	0	1	0	0
55	0	2	2	3	2	2	0	5	0	0	0	1	0	0	0	0	0	0	0	0	0	0	0	1	0	0	0	0	0	0	0	130	90	100	60	0	0	0	0	0	0	0	0	2	1	0	1	0	0
56	1	0	6	2	2	3	0	7	0	0	0	0	0	0	0	0	0	0	0	0	0	0	0	0	0	0	0	0	0	0	0	137	79	130	70	0	0	0	0	0	0	0	1	1	0	0	0	0	0
68	1	1	5	2	2	2	0	7	0	0	0	0	0	0	0	0	0	0	0	0	0	0	0	0	0	0	0	1	0	0	0	148	83	160	80	0	0	0	0	0	0	0	0	2	0	0	0	0	0
81	1	0	1	1	1	0	0	0	0	0	0	0	0	0	0	0	0	0	0	0	0	0	0	0	0	0	0	0	0	0	0	140	80	130	80	0	0	0	0	0	0	1	1	0	0	0	1	0	0
55	0	0	3	2	2	0	0	0	0	0	0	0	0	0	0	0	0	0	0	0	0	0	0	0	0	0	0	0	0	0	0	120	73	110	70	0	0	0	0	0	0	1	0	0	0	0	0	0	0
60	0	0	0	0	0	3	0	6	0	0	0	0	0	0	0	0	0	0	0	0	0	0	0	0	0	0	0	0	0	0	0	181	106	200	120	0	0	0	0	0	0	1	1	0	1	0	1	0	0
62	0	1	3	1	1	0	0	0	0	0	0	0	0	0	0	0	0	0	0	0	0	0	0	0	0	0	0	0	0	0	0	120	80	140	80	0	0	0	0	0	0	1	1	0	0	0	0	0	0
62	0	2	6	2	2	2	0	6	0	0	0	0	0	0	0	0	0	0	0	0	0	0	0	1	0	0	0	0	0	0	0	160	90	140	60	0	0	0	0	0	0	0	1	1	0	0	1	0	0
59	0	0	2	2	2	0	0	0	0	0	0	0	0	0	0	0	0	0	0	0	0	0	0	1	0	0	0	0	0	0	0	112	68	100	60	0	0	0	0	0	0	4	1	0	0	0	1	0	0
51	0	0	0	0	0	2	0	7	0	0	0	0	0	0	0	0	0	0	0	0	0	0	0	0	0	0	0	0	0	0	0	152	90	150	92	0	0	0	0	0	0	1	1	0	0	0	1	0	0
66	1	0	4	2	2	0	0	0	0	0	0	0	0	0	0	0	0	0	0	0	0	0	0	0	0	0	0	1	0	0	0	116	68	100	60	0	0	0	0	0	0	4	1	0	0	0	0	0	0
63	0	0	6	2	1	2	0	7	0	0	0	0	0	0	0	0	0	0	0	0	0	0	0	0	0	0	0	0	0	0	0	148	86	150	90	0	0	0	0	0	0	1	1	1	0	0	1	0	0
66	1	1	6	2	1	2	0	7	0	0	0	0	0	0	0	0	0	0	0	0	0	0	0	0	0	0	0	0	0	0	0	146	85	143	85	0	0	0	0	0	0	1	1	0	0	0	1	0	0
61	0	0	4	2	2	3	0	7	0	0	0	0	0	0	0	0	0	0	0	0	0	0	0	0	0	0	0	0	0	0	0	160	93	170	100	0	0	0	0	0	0	3	1	0	0	0	1	0	0
62	1	1	2	2	1	0	0	0	0	0	0	0	0	0	0	0	0	0	0	0	0	0	0	0	0	0	0	0	0	0	0	126	77	124	77	0	0	0	0	0	0	3	1	0	0	0	1	0	0
67	1	1	1	2	1	2	0	6	0	0	0	0	0	0	0	0	0	0	0	0	0	0	0	0	0	0	0	0	0	0	0	120	80	120	70	0	0	0	0	0	0	0	0	1	1	0	1	0	0
50	0	0	0	0	0	2	0	6	0	0	0	0	0	0	0	0	0	0	0	0	0	0	0	0	0	0	0	0	0	0	0	160	100	160	120	0	0	0	0	0	0	1	3	0	0	0	0	0	0
57	1	0	0	0	2	0	0	0	0	0	0	0	0	0	0	0	0	0	0	0	0	0	0	0	0	0	0	0	0	0	0	120	70	180	110	0	0	0	0	0	0	1	1	0	0	0	0	0	0
75	1	3	6	2	2	2	0	7	0	0	0	0	0	0	0	0	0	0	0	0	0	0	0	0	0	0	0	0	0	0	0	190	100	180	100	0	0	0	0	0	0	1	1	0	0	0	1	0	0
68	1	0	6	3	2	2	0	7	0	1	0	0	0	0	0	0	0	0	0	0	0	0	0	0	0	0	0	1	0	0	0	168	95	170	100	0	0	0	0	0	0	1	1	0	0	0	0	0	0
79	0	1	6	2	1	2	0	2	0	0	0	0	0	0	0	0	0	0	0	0	0	0	0	0	0	0	0	0	0	0	0	150	100	120	70	0	0	0	0	0	0	1	1	2	0	0	1	0	0
44	1	0	0	0	0	2	0	3	0	0	0	0	0	0	0	0	0	0	0	0	0	0	0	0	0	0	0	0	0	0	0	132	83	135	86	0	0	0	0	0	0	4	1	0	0	0	1	0	0
62	1	0	5	2	1	0	0	0	0	0	0	0	0	0	0	0	0	0	0	0	0	0	0	1	0	0	0	1	0	0	0	180	110	130	80	0	0	0	0	0	0	4	3	0	0	0	1	0	0
51	1	0	0	0	2	2	0	5	0	0	0	0	0	0	0	0	0	0	0	0	0	0	0	0	0	0	0	0	0	0	0	129	80	129	81	0	0	0	0	0	0	4	1	0	0	1	1	0	0
54	1	0	0	0	2	0	0	0	0	0	0	0	0	0	0	0	0	0	0	0	0	0	0	0	0	0	0	0	0	0	0	136	81	140	80	0	0	0	0	0	0	4	1	0	0	0	1	0	0
53	1	0	0	0	0	3	0	5	0	0	0	0	0	0	0	0	0	0	0	0	0	0	0	0	0	0	0	0	0	0	0	133	84	120	90	0	0	0	0	0	0	0	0	3	1	0	1	0	0
63	0	0	2	1	2	0	0	0	0	0	0	0	0	0	0	0	0	0	0	0	0	0	0	0	0	0	0	0	0	0	0	129	78	130	80	0	0	0	0	0	0	1	1	1	0	0	0	0	0
52	1	0	4	2	1	0	1	6	0	0	0	0	0	0	0	0	0	0	0	0	0	0	0	0	0	0	0	0	0	0	0	150	100	160	90	0	0	0	0	0	0	0	0	2	0	0	1	0	0
63	0	0	0	0	0	2	0	5	0	0	0	0	0	0	0	0	0	0	0	0	0	0	0	0	0	1	0	0	0	0	0	163	95	160	100	0	0	0	0	0	0	4	1	0	0	0	1	0	0
54	1	0	0	0	0	0	0	0	0	0	0	0	0	0	0	0	0	0	0	0	0	0	0	0	0	0	0	0	0	0	0	142	88	140	100	0	0	0	0	0	0	1	1	0	0	0	1	0	0
56	1	0	0	0	0	2	0	6	0	0	0	0	0	0	0	0	0	0	0	0	0	0	0	0	0	0	0	1	0	0	0	148	85	150	80	0	0	0	0	0	0	0	0	4	2	0	0	0	0
57	1	0	1	2	1	2	0	4	0	0	0	0	0	0	0	0	0	0	0	0	0	0	0	0	0	0	0	0	0	0	0	128	79	120	80	0	0	0	0	0	0	0	0	3	1	0	1	0	0
49	1	3	4	3	1	0	0	0	0	1	0	0	0	0	0	0	0	0	0	0	0	0	0	0	0	0	0	0	0	0	0	115	71	110	70	0	0	0	0	0	0	3	2	0	0	0	0	0	0
66	0	0	6	2	1	0	1	7	0	0	0	0	0	0	0	0	0	0	0	0	0	0	0	0	0	0	0	0	0	0	0	140	90	160	90	0	0	0	0	0	0	0	0	1	0	0	0	0	0
35	1	0	0	0	2	0	0	0	0	0	0	0	0	0	0	0	0	0	0	0	0	0	0	0	0	0	0	0	0	0	0	120	80	130	80	0	0	0	0	0	0	0	1	2	1	0	1	0	0
57	1	0	3	2	0	0	0	0	0	0	0	0	0	0	0	0	0	0	0	0	0	0	0	0	0	0	0	1	0	0	0	110	70	120	80	0	0	0	0	0	0	4	4	0	0	0	0	0	0
55	1	0	0	0	0	0	0	0	0	0	0	0	0	0	0	0	0	0	0	0	0	0	0	0	0	0	0	0	0	0	0	178	103	200	120	0	0	0	0	0	0	1	1	0	0	0	1	0	0
60	1	0	0	0	0	3	0	6	0	0	0	0	0	0	0	0	0	0	0	0	0	0	0	0	0	0	0	0	0	0	0	143	83	130	80	0	0	0	0	0	0	1	1	0	0	0	1	0	0
80	0	0	0	0	0	0	0	0	0	0	0	0	0	0	0	0	0	0	0	0	0	0	0	0	0	0	0	0	0	0	0	90	60	110	70	0	0	0	0	0	0	1	1	0	0	0	1	0	0
62	0	0	2	2	1	2	0	6	0	1	0	0	0	0	0	0	0	0	0	0	0	0	0	1	0	0	0	0	0	0	0	115	70	140	90	0	0	1	0	0	0	2	1	2	0	0	0	1	0
81	0	0	5	3	1	0	0	0	0	0	0	0	1	0	0	0	0	0	0	0	0	0	0	0	0	0	0	0	0	0	0	180	110	160	90	0	0	1	0	0	0	0	0	4	0	0	0	1	0
76	0	0	0	0	2	2	0	7	0	0	0	0	0	0	0	0	0	0	0	0	0	0	0	0	0	0	0	0	0	0	0	150	86	144	85	0	0	0	0	0	0	0	0	4	0	0	1	0	0
67	1	1	2	2	1	3	0	7	0	0	0	0	0	0	0	0	0	0	0	0	0	0	0	0	0	0	0	0	0	0	0	134	81	120	80	0	0	0	0	0	0	0	1	4	2	0	1	0	0
54	1	0	0	0	0	2	0	4	0	0	0	0	0	0	0	0	0	0	0	0	0	0	0	0	0	0	0	0	0	0	0	155	92	160	100	0	0	0	0	0	0	0	1	2	1	0	0	0	0
78	1	0	0	0	0	0	0	0	0	0	0	0	0	0	0	0	0	0	0	0	0	0	0	0	0	0	0	0	0	0	0	134	79	130	80	0	0	0	0	0	0	4	2	0	0	0	1	0	0
59	1	1	3	2	1	2	0	4	0	0	0	0	0	0	0	0	0	0	0	0	0	0	0	0	0	0	0	1	0	0	0	130	90	170	110	0	0	0	0	0	0	4	3	0	0	0	1	0	0
69	0	0	6	2	1	2	0	6	0	0	0	0	0	0	0	0	0	0	0	0	0	0	0	0	0	0	0	0	0	0	0	210	110	110	70	0	0	0	0	0	0	1	1	0	0	0	0	0	0
53	1	0	0	0	0	2	0	4	0	0	0	0	0	0	0	0	0	0	0	0	0	0	0	0	0	0	0	0	0	0	0	104	67	90	60	0	0	0	0	0	0	4	1	0	0	0	0	0	0
59	1	1	3	2	2	2	0	4	0	0	0	0	0	0	0	0	0	0	0	0	0	0	0	0	0	0	0	0	0	0	0	151	87	160	90	0	0	0	0	0	0	4	4	0	0	0	1	0	0
81	0	0	6	2	1	2	0	7	0	0	0	0	0	0	0	0	0	0	0	0	0	0	0	1	0	0	0	0	0	0	0	157	88	150	90	0	0	0	0	0	0	0	0	1	1	0	1	0	0
74	1	0	3	2	2	3	0	6	0	0	0	0	0	0	0	0	0	0	0	0	0	0	0	0	0	0	0	1	0	0	0	160	80	140	80	0	0	0	0	0	0	4	1	0	0	1	1	0	0
75	0	2	6	2	1	3	0	7	0	0	0	0	0	0	0	0	0	0	0	0	0	0	0	0	0	0	0	0	0	0	0	140	80	110	70	0	0	0	0	0	0	0	0	2	0	0	1	0	0
61	0	0	2	1	2	3	0	7	0	0	0	0	0	0	0	0	0	0	0	0	0	0	0	0	0	0	0	0	0	0	0	170	100	160	100	0	0	0	0	0	0	4	1	0	0	0	1	0	0
42	1	0	2	1	0	0	0	0	0	0	0	0	0	0	0	0	0	0	0	0	0	0	0	0	0	0	0	0	0	0	0	70	40	77	53	1	0	0	0	0	0	4	1	0	0	0	0	0	0
49	1	0	0	0	0	1	0	3	0	0	0	0	0	0	0	0	0	0	0	0	0	0	0	0	0	0	0	0	0	0	0	120	80	150	80	0	0	0	0	0	0	4	2	0	0	0	0	0	0
50	1	0	0	0	2	2	0	3	0	0	0	0	0	0	0	0	0	0	0	0	0	0	0	0	0	0	0	0	0	0	0	140	87	140	100	0	0	0	0	0	0	4	4	0	0	0	0	0	0
66	1	0	0	0	2	0	0	0	0	0	0	0	0	0	0	0	0	0	0	0	0	0	0	0	0	0	0	0	0	0	0	130	80	130	80	0	0	0	0	0	0	4	0	0	0	0	1	0	0
68	0	0	2	2	2	2	0	7	0	0	0	0	0	0	0	0	0	0	0	0	0	0	0	0	0	0	0	0	0	0	0	200	120	160	90	1	0	0	0	0	0	1	1	0	0	0	1	0	0
52	1	1	4	2	2	0	0	0	0	0	0	0	0	0	0	0	0	0	0	0	0	0	0	0	0	0	0	0	0	0	0	119	76	120	80	0	0	0	0	0	0	0	0	2	0	0	0	0	1
51	1	0	0	0	0	0	0	0	0	0	0	0	0	0	0	0	0	0	0	0	0	0	0	0	0	0	0	0	0	0	0	105	70	120	70	0	0	0	0	0	0	0	0	3	0	0	1	0	0
62	1	0	0	0	2	0	0	0	0	0	0	0	0	0	0	0	0	0	0	0	0	0	0	0	0	0	0	0	0	0	0	125	80	120	80	0	0	0	0	0	0	0	2	4	1	0	1	0	0
60	1	1	6	2	1	2	0	7	0	0	0	0	0	0	0	0	0	0	0	0	0	0	0	0	0	0	0	0	0	0	0	130	80	132	81	0	0	0	0	0	0	1	1	0	0	0	1	0	0
64	1	0	3	2	2	0	0	0	0	0	0	0	0	0	0	0	0	0	0	0	0	0	0	0	0	0	0	0	0	0	0	110	69	100	70	0	0	0	0	0	0	0	0	2	2	0	1	0	0
65	1	0	2	2	1	0	0	0	0	0	0	0	0	0	0	0	0	0	0	0	0	0	0	0	0	0	0	1	0	0	0	130	80	120	80	0	0	0	0	0	0	4	1	0	0	0	1	0	0
55	1	0	0	0	2	0	0	0	0	0	0	0	0	0	0	0	0	0	0	0	0	0	0	0	0	0	0	0	0	0	0	123	75	120	70	0	0	0	0	0	0	0	0	3	1	0	1	0	0
61	0	0	0	0	2	0	0	0	0	0	0	0	0	0	0	0	0	0	0	0	0	0	0	0	0	0	0	0	0	0	0	125	78	120	80	0	0	0	0	0	0	4	1	0	0	0	0	0	0
58	1	2	5	2	1	0	0	0	0	0	0	0	0	0	0	0	0	0	0	0	0	0	0	0	0	0	0	0	0	0	0	130	78	130	80	0	0	0	0	0	0	0	0	1	0	0	1	0	0
75	0	0	0	0	2	2	0	7	0	0	0	0	0	0	0	0	0	0	0	0	0	0	0	0	0	0	0	0	0	0	0	146	84	130	80	0	0	0	0	0	0	1	1	0	0	0	0	0	0
65	1	0	4	2	2	2	0	5	0	0	0	0	0	0	0	0	0	0	0	0	0	0	0	0	0	0	0	0	0	0	0	168	94	170	100	0	0	1	0	0	0	1	1	0	0	0	1	0	0
73	0	0	6	2	1	0	0	0	0	0	0	0	0	0	0	0	0	0	0	0	0	0	0	0	0	0	0	0	0	0	0	160	90	130	80	0	0	0	0	0	0	1	1	0	0	0	1	0	0
68	1	0	6	2	2	0	0	0	0	0	0	0	0	0	0	0	0	0	0	0	0	0	0	0	0	0	0	1	0	0	0	121	72	110	70	0	0	0	0	0	0	4	1	0	0	0	1	0	0
80	1	1	6	2	1	3	0	7	0	0	0	0	0	0	0	0	0	0	0	0	0	0	0	0	0	0	0	0	0	0	0	200	100	160	90	0	0	0	0	0	0	1	1	0	0	0	1	0	0
56	1	1	4	2	2	3	0	7	0	0	0	0	0	0	0	0	0	0	0	0	0	0	0	0	0	0	0	0	0	0	0	210	100	180	110	0	0	0	0	0	0	0	1	3	0	0	1	0	0
46	1	1	0	0	2	0	0	0	0	0	0	0	0	0	0	0	0	0	0	0	0	0	0	0	0	0	0	0	0	0	0	120	80	110	70	0	0	0	0	0	0	3	4	0	0	0	1	0	0
67	0	0	3	2	1	3	0	7	0	0	0	0	0	0	0	0	0	0	0	0	0	0	0	1	0	0	0	0	0	0	0	156	89	150	90	0	0	0	0	0	0	2	1	1	0	0	0	0	0
33	1	0	0	0	0	0	0	0	0	0	0	0	0	0	0	0	0	0	0	0	0	0	0	0	0	0	0	0	0	0	0	117	74	110	70	0	0	0	0	0	0	0	0	1	0	0	1	0	0
43	1	0	0	0	0	2	0	5	0	0	0	0	0	0	0	0	0	0	0	0	0	0	0	0	0	0	0	0	0	0	0	129	77	120	70	0	0	1	0	0	0	4	2	0	0	0	0	1	0
81	0	0	0	0	2	3	0	7	0	0	0	0	0	0	0	0	0	0	0	0	0	0	0	0	0	0	0	0	0	0	0	165	94	160	100	0	0	0	0	0	0	1	1	0	0	0	1	0	0
51	1	0	0	0	0	0	0	0	0	0	0	0	0	0	0	0	0	0	0	0	0	0	0	0	0	0	0	0	0	0	0	139	84	140	90	0	0	0	0	0	0	1	1	0	0	0	1	0	0
62	1	2	2	2	1	2	0	3	0	0	0	0	0	0	0	0	0	0	0	0	0	0	0	0	0	0	0	0	0	0	0	151	88	145	90	0	0	0	0	0	0	1	1	0	0	0	1	0	0
61	1	1	5	2	2	2	0	4	0	0	0	0	0	0	0	0	0	0	0	0	0	0	0	0	0	0	0	0	0	0	0	128	78	120	80	1	0	0	0	0	0	0	0	1	0	0	0	0	0
56	1	1	2	2	1	0	0	0	0	0	0	0	0	0	0	0	0	0	0	0	0	0	0	0	0	0	0	0	0	0	0	133	80	130	80	0	0	0	0	0	0	4	1	0	0	0	1	0	0
67	0	0	6	2	1	2	0	5	0	0	0	0	0	0	0	0	0	0	0	0	0	0	0	1	0	0	0	0	0	0	0	120	80	130	80	0	0	0	0	0	0	0	0	3	0	0	0	0	0
56	1	1	1	2	1	0	0	0	0	0	0	0	0	0	0	1	0	0	0	0	0	0	0	0	0	0	0	0	0	0	0	128	79	130	80	0	0	0	0	0	0	0	0	4	1	0	1	0	0
60	1	3	6	2	2	2	0	7	0	0	0	0	0	0	0	0	0	0	0	0	0	0	0	0	0	0	0	0	0	0	0	131	80	115	80	0	0	0	0	0	0	1	1	0	0	0	1	0	0
65	1	0	2	2	1	3	0	7	0	0	0	0	0	0	0	0	0	0	0	0	0	0	0	0	0	0	0	1	0	0	0	122	74	120	70	0	0	0	0	0	0	4	1	0	0	0	0	0	0
59	1	0	6	2	2	0	0	0	0	0	0	0	0	0	0	0	0	0	0	0	0	0	0	0	0	0	0	0	0	0	0	160	85	140	90	0	0	0	0	0	0	4	2	0	0	0	1	0	0
62	1	0	4	2	1	0	0	0	0	0	0	0	0	0	0	0	0	0	0	0	0	0	0	0	0	0	0	0	0	0	0	114	70	110	70	0	0	0	0	0	0	3	2	0	0	0	0	0	0
63	1	1	4	2	1	0	0	0	0	0	0	0	0	0	0	0	0	0	0	0	0	0	0	0	0	0	0	1	0	0	0	86	55	70	40	0	0	1	0	0	0	0	2	3	0	0	1	0	0
55	1	0	0	0	0	2	0	7	0	0	0	0	0	0	0	0	0	0	0	0	0	0	0	0	0	0	0	0	0	0	0	166	96	180	100	0	0	0	0	0	0	0	0	4	1	0	0	0	0
55	1	0	0	0	0	0	0	0	0	1	0	0	0	0	0	0	0	0	0	0	0	0	0	0	0	0	0	0	0	0	0	133	80	140	80	0	0	0	0	0	0	4	1	0	0	0	1	0	0
62	1	0	3	2	2	2	0	5	0	0	0	0	0	0	0	0	0	0	0	0	0	0	0	0	0	0	0	1	0	0	0	159	90	170	90	0	0	0	0	0	0	0	0	4	0	0	1	0	0
39	1	0	0	0	0	0	0	0	0	0	0	0	0	0	0	0	0	0	0	0	0	0	0	0	0	0	0	0	0	0	0	107	71	100	70	0	0	0	0	0	0	3	2	0	0	0	1	0	0
54	0	0	0	0	0	0	0	0	0	0	0	0	0	0	0	0	0	0	0	0	0	0	0	0	1	0	0	0	0	0	0	157	92	170	100	0	0	0	0	0	0	4	4	0	0	0	1	0	0
80	0	0	0	0	2	2	0	6	0	0	0	0	0	0	0	0	0	0	0	0	0	0	0	0	0	0	0	0	0	0	0	90	60	100	60	0	0	0	0	0	0	0	0	2	0	0	1	0	0
69	1	1	2	2	1	2	0	7	0	0	0	0	0	0	0	0	0	0	0	0	0	0	0	0	0	0	0	0	0	0	0	152	87	145	88	0	0	0	0	0	0	2	1	0	0	0	1	0	0
43	1	0	0	0	2	2	0	5	0	0	0	0	0	0	0	0	0	0	0	0	0	0	0	0	0	0	0	0	0	0	0	144	85	140	80	0	0	0	0	0	0	1	1	0	0	0	1	0	0
58	1	0	0	0	2	2	0	7	0	0	0	0	0	0	0	0	0	0	0	0	0	0	0	0	0	0	0	0	0	0	0	134	82	120	80	0	0	0	0	0	0	4	1	2	0	0	0	0	0
64	1	1	0	0	2	2	0	7	0	0	0	0	0	0	0	0	0	0	0	0	0	0	0	0	0	0	0	0	0	1	0	143	83	130	80	0	0	0	0	0	0	0	0	1	0	0	1	0	0
60	1	1	4	2	2	0	0	0	0	0	0	0	0	0	0	0	0	0	0	0	0	0	0	0	0	0	0	0	0	0	0	114	71	110	70	0	0	0	0	0	0	4	3	0	0	0	1	0	0
52	0	0	0	0	0	2	0	3	0	0	0	0	0	0	0	0	0	0	0	0	0	0	0	0	0	0	0	0	0	0	0	140	90	130	80	1	0	0	0	0	0	4	3	0	0	0	0	0	0
66	1	0	0	0	0	2	0	5	0	0	0	0	0	0	0	0	0	0	0	0	0	0	0	0	0	0	0	0	0	0	0	104	64	80	50	0	0	0	0	1	0	0	0	3	2	0	0	0	0
64	0	0	0	0	2	0	0	0	0	0	0	0	0	0	0	0	0	0	0	0	0	0	0	1	0	0	0	0	0	0	0	140	90	90	60	0	0	0	0	0	0	4	1	0	0	0	0	0	0
65	1	1	5	2	1	2	0	5	0	0	0	0	0	0	0	0	0	0	0	0	0	0	0	0	0	0	0	0	0	0	0	166	93	190	100	1	0	0	0	0	0	1	1	0	0	0	0	0	0
47	0	1	2	2	2	2	0	7	0	0	0	0	0	0	0	0	0	0	0	0	0	0	0	1	0	0	0	0	0	0	0	115	80	120	80	0	0	0	0	0	0	1	1	0	0	0	0	0	0
60	1	1	2	2	1	2	0	4	0	0	0	0	0	0	0	0	0	0	0	0	0	0	0	0	0	0	0	1	0	0	0	110	60	130	80	1	0	1	0	0	0	4	1	0	0	0	1	0	0
65	0	0	2	2	1	2	0	5	0	0	0	0	0	0	0	0	0	0	0	0	0	0	0	0	0	0	0	0	0	0	0	131	80	130	80	0	0	0	0	0	0	4	1	0	0	0	1	0	0
78	0	0	2	2	1	0	0	0	0	0	0	0	0	0	0	0	0	0	0	0	0	0	0	0	0	0	0	0	0	0	0	131	76	125	77	0	0	0	0	0	0	4	2	0	0	0	0	0	0
81	0	0	0	0	2	2	0	5	0	0	0	0	0	0	0	0	0	0	0	0	0	0	0	0	0	0	0	0	0	0	0	130	80	130	80	0	0	0	0	0	0	0	1	0	2	0	1	0	0
65	0	0	1	2	1	2	0	5	0	0	0	0	0	0	0	0	0	0	0	0	0	0	0	0	0	0	0	0	0	0	0	130	85	140	80	0	0	0	0	0	0	0	0	4	0	0	1	0	0
79	0	3	6	2	1	2	0	7	0	0	0	0	0	0	0	0	0	0	0	0	0	0	0	0	0	0	0	0	0	0	0	114	65	80	50	0	0	0	0	0	0	4	1	0	0	0	0	0	0
57	0	0	6	2	1	2	0	7	0	0	0	0	0	0	0	0	0	0	0	0	0	0	0	1	0	0	0	0	0	0	0	128	76	110	70	0	0	0	0	0	0	1	1	0	0	0	1	0	0
80	1	0	6	2	2	3	0	7	0	0	0	0	1	0	0	0	0	0	0	0	0	0	0	0	0	0	0	0	0	0	0	183	92	200	80	0	0	0	0	0	0	4	1	0	0	0	0	0	0
69	0	0	0	0	0	3	0	7	0	0	0	0	0	0	0	0	0	0	0	0	0	0	0	0	0	0	0	0	1	0	0	160	91	160	90	0	0	0	0	0	0	4	1	0	0	0	0	0	0
63	1	1	2	2	1	0	0	0	0	0	0	0	0	0	0	0	0	0	0	0	0	0	0	1	0	0	0	0	0	0	0	133	79	126	79	0	0	0	0	0	0	4	1	0	0	0	1	0	0
54	0	0	1	2	2	0	1	6	0	0	0	0	0	0	0	0	0	0	0	0	0	0	0	0	1	0	0	1	0	0	0	170	100	140	90	0	0	0	0	0	0	3	1	0	0	0	1	0	0
74	1	1	6	2	2	0	0	0	0	0	0	0	0	0	0	0	0	0	0	0	0	0	0	0	0	0	0	0	0	0	0	120	80	120	80	0	0	0	0	0	0	0	1	1	1	0	1	0	0
63	1	1	0	0	2	0	0	0	0	0	0	0	0	0	0	0	0	0	0	0	0	0	0	0	0	0	0	1	0	0	0	123	77	110	80	0	0	0	0	0	0	0	0	1	0	0	1	0	0
87	0	0	6	2	2	3	0	8	0	0	0	0	0	0	0	0	0	0	0	0	0	0	0	0	0	0	0	0	0	0	0	167	90	160	90	0	0	0	0	0	0	0	0	2	0	0	1	0	0
83	1	2	6	2	1	2	0	7	0	0	0	0	0	0	0	0	0	0	0	0	0	0	0	0	0	0	0	0	0	0	0	145	82	120	80	0	0	0	0	0	0	0	0	3	0	0	1	0	0
74	0	0	4	2	1	0	0	0	0	0	0	0	0	0	0	0	0	0	0	0	0	0	0	1	0	0	0	0	0	0	0	97	62	80	60	0	0	0	0	0	0	0	0	2	0	0	0	0	0
63	0	0	5	2	1	2	0	6	0	0	0	0	0	0	0	0	0	0	0	0	0	0	0	1	0	0	0	0	0	0	0	164	93	180	100	0	0	0	0	0	0	0	0	3	0	0	1	0	0
64	0	1	4	2	2	2	0	7	0	0	0	0	1	0	0	0	0	0	0	0	0	0	0	0	0	0	0	1	0	0	0	118	72	100	70	0	0	1	0	0	0	0	0	1	0	0	0	1	0
82	0	2	6	2	1	3	0	9	0	0	0	0	0	0	0	0	0	0	0	0	0	0	0	1	0	0	0	0	0	0	0	153	84	140	80	0	0	0	0	0	0	0	0	1	0	0	0	0	0
78	1	2	6	2	1	2	0	6	0	0	0	0	0	0	0	0	0	0	0	0	0	0	0	0	0	0	0	1	0	0	0	158	85	160	80	0	0	0	0	0	0	0	1	0	0	0	1	0	0
68	0	0	0	0	0	1	0	5	0	0	0	0	0	0	0	0	0	0	0	0	0	0	0	1	0	0	0	0	1	0	0	124	76	120	80	0	0	1	0	0	0	4	4	0	0	0	0	1	0
70	0	0	6	2	1	2	0	7	0	0	0	0	0	0	0	0	0	0	0	0	0	0	0	1	0	0	0	1	0	0	0	161	87	170	80	0	0	0	0	0	0	0	1	0	3	0	1	0	0
62	1	0	0	0	0	0	0	0	0	0	0	0	0	0	0	0	0	0	0	0	0	0	0	0	0	0	0	0	0	0	0	115	71	110	70	0	0	0	0	0	0	4	3	0	0	0	1	0	0
78	0	1	6	2	1	0	0	0	0	0	0	0	1	0	0	0	0	0	0	0	0	0	0	0	0	0	0	0	0	0	0	141	80	140	80	0	0	0	0	0	0	1	1	0	0	0	1	0	0
38	1	1	6	2	1	0	0	0	0	0	0	0	0	0	0	0	0	0	0	0	0	0	0	0	0	0	0	0	0	0	0	115	75	120	80	0	0	0	0	0	0	0	0	3	4	0	1	0	0
57	1	0	0	0	2	0	0	0	0	0	0	0	0	0	0	0	0	0	0	0	0	0	0	0	0	0	0	0	0	0	0	138	85	140	90	0	0	0	0	0	0	0	1	2	0	0	1	0	0
77	1	0	2	2	1	0	0	0	0	0	0	0	0	0	0	0	0	0	0	0	0	0	0	0	0	0	0	0	0	0	0	130	70	130	80	0	0	1	0	0	0	0	0	3	0	0	0	1	0
76	0	0	0	0	0	2	0	5	0	0	0	0	0	0	0	0	0	0	0	0	0	0	0	0	0	0	0	0	0	0	0	149	87	140	90	0	0	0	0	0	0	0	1	1	0	0	1	0	0
66	1	0	6	2	2	2	0	7	0	0	0	0	0	0	0	0	0	0	0	0	0	0	0	0	0	0	0	0	0	0	0	135	80	130	80	0	0	0	0	0	0	0	1	0	0	0	1	0	0
67	1	0	2	2	1	2	0	7	0	0	0	0	0	0	0	0	0	0	0	0	0	0	0	1	0	0	0	0	0	0	0	140	90	170	90	0	0	0	0	0	0	0	0	3	0	0	0	0	1
82	0	2	0	0	2	2	0	5	0	0	0	0	0	0	0	0	0	0	0	0	0	0	0	0	0	0	0	0	0	0	0	169	95	160	100	0	0	0	0	0	0	0	0	4	0	0	1	0	0
48	1	0	0	0	2	2	0	5	0	0	0	0	0	0	0	0	0	0	0	0	0	0	0	1	0	0	0	0	0	0	0	162	95	170	100	0	0	0	0	0	0	0	0	3	0	0	0	0	0
63	1	2	4	2	2	0	0	0	0	0	0	0	0	0	0	0	0	0	0	0	0	0	0	1	0	0	0	0	0	0	0	139	83	140	90	0	0	0	0	0	0	0	0	4	0	0	1	0	0
52	1	0	0	0	0	0	0	0	0	0	0	0	0	0	0	0	0	0	0	0	0	0	0	0	0	0	0	0	0	0	0	158	99	170	120	0	0	0	0	0	0	3	1	0	0	0	1	0	0
79	0	2	1	3	1	3	0	7	0	0	0	0	1	0	0	0	0	0	0	0	0	0	0	0	0	0	0	0	0	0	0	134	77	110	70	0	0	1	0	0	0	3	1	0	0	0	0	1	0
63	1	2	3	2	2	2	0	7	0	0	0	0	0	0	0	0	0	0	0	0	0	0	0	1	0	0	0	1	0	0	0	152	86	150	80	0	0	0	0	0	0	0	0	1	0	0	1	0	0
59	1	1	5	2	1	2	0	6	0	0	0	0	0	0	0	0	0	0	0	0	0	0	0	0	0	0	0	0	0	0	0	147	86	140	90	0	0	0	0	0	0	0	0	2	0	0	1	0	0
68	1	0	4	2	2	2	0	7	0	0	0	0	0	0	0	0	0	0	0	0	0	0	0	0	0	0	0	0	0	0	0	140	82	130	80	0	0	0	0	0	0	0	0	3	2	0	1	0	0
70	1	0	5	2	2	2	0	7	0	0	0	0	0	0	0	0	0	0	0	0	0	0	0	1	0	0	0	0	0	0	0	150	80	160	110	0	0	1	0	0	0	0	0	2	0	0	0	1	0
74	1	1	6	2	2	0	0	0	0	0	0	0	0	0	0	0	0	0	0	0	0	0	0	0	0	0	0	0	0	0	0	140	80	140	90	0	0	0	0	0	0	0	0	3	0	0	1	0	0
57	1	0	2	1	2	0	0	0	0	0	0	0	0	0	0	0	0	0	0	0	0	0	0	0	0	0	0	0	0	0	0	120	80	117	79	0	0	0	0	0	0	3	1	0	0	0	1	0	0
61	0	0	2	1	2	2	0	1	0	0	0	0	0	0	0	0	0	0	0	0	0	0	0	0	0	0	0	0	0	0	0	140	88	140	100	1	0	0	0	0	0	4	1	0	0	0	1	0	0
40	1	0	1	1	1	0	0	0	0	0	0	0	0	0	0	0	0	0	0	0	0	0	0	0	0	0	0	0	0	0	0	80	50	80	60	0	0	0	0	0	0	0	0	3	0	1	0	0	1
63	1	0	6	3	2	2	0	7	0	0	0	0	0	0	0	0	0	0	0	0	0	0	0	0	0	0	0	0	0	0	0	130	80	160	110	0	0	0	0	0	0	0	0	1	0	0	0	0	0
78	1	0	5	2	1	2	0	5	0	1	0	0	0	0	0	0	0	0	0	0	0	0	0	0	0	0	0	0	0	0	0	145	82	140	80	0	0	1	0	0	0	0	0	1	0	0	0	1	0
73	0	0	6	2	1	2	0	7	0	0	0	0	0	0	0	0	0	0	0	0	0	0	0	0	0	0	0	0	0	0	0	146	79	140	70	0	0	0	0	0	0	3	1	0	0	0	1	0	0
63	1	0	0	0	0	0	0	0	0	0	0	0	0	0	0	0	0	0	0	0	0	0	0	0	0	0	0	0	0	0	0	129	78	120	80	0	0	0	0	0	0	4	3	0	0	0	1	0	0
43	1	0	0	0	0	0	0	0	0	0	0	0	0	0	0	0	0	0	0	0	0	0	0	0	0	0	0	0	0	0	0	130	80	130	80	0	0	0	0	0	0	4	1	0	0	0	1	0	0
63	1	0	0	0	0	0	0	0	0	0	0	0	0	0	0	0	0	0	0	0	0	0	0	0	0	0	0	0	0	0	0	150	90	110	70	0	0	0	0	0	0	4	0	0	0	0	1	0	0
69	1	0	0	0	0	3	0	7	0	0	0	0	0	0	0	0	0	0	0	0	0	0	0	0	0	0	0	0	1	0	0	160	100	180	130	1	0	0	0	0	0	2	1	1	0	0	0	0	0
61	1	0	0	0	0	0	0	0	0	0	0	0	0	0	0	0	0	0	0	0	0	0	0	0	0	0	0	0	0	0	0	120	70	110	70	0	0	0	0	0	0	0	0	2	0	0	1	0	0
69	0	1	1	2	1	2	0	5	2	0	0	0	0	0	0	0	0	0	0	0	0	0	0	1	0	0	0	0	0	0	0	147	86	140	90	1	0	0	0	0	0	2	1	1	0	0	0	0	0
54	1	2	2	2	2	0	0	0	0	0	0	0	0	0	0	0	0	0	0	0	0	0	0	0	0	0	0	0	0	0	0	115	70	115	75	0	0	0	0	0	0	4	0	0	0	0	1	0	0
63	0	0	0	0	0	2	0	7	0	0	0	0	0	0	0	0	0	0	0	0	0	0	0	0	0	0	0	0	0	0	0	135	81	130	80	0	0	0	0	0	0	0	1	4	1	0	1	0	0
61	1	0	0	0	2	2	0	5	0	0	0	0	0	0	0	0	0	0	0	0	0	0	0	0	0	0	0	0	0	0	0	120	80	130	80	0	0	0	0	0	0	4	2	0	0	0	1	0	0
49	1	1	3	1	2	0	0	0	0	0	0	0	0	0	0	0	0	0	0	0	0	0	0	0	0	0	0	0	0	0	0	135	81	140	80	0	0	0	0	0	0	4	1	0	0	0	1	0	0
77	0	0	0	0	0	0	0	0	0	0	0	0	0	0	0	0	0	0	0	0	0	0	0	0	0	0	0	0	0	1	0	140	83	140	90	0	0	0	0	0	0	0	1	4	0	0	0	0	0
65	1	1	3	2	1	2	0	5	0	1	0	0	0	0	0	0	0	0	0	0	0	0	0	0	0	0	0	0	1	0	0	110	70	150	90	0	0	0	0	0	0	0	0	3	0	0	1	0	0
85	0	0	0	0	0	0	0	0	0	0	0	0	0	0	0	0	0	0	0	0	0	0	0	0	0	0	0	0	0	0	0	140	80	130	80	1	0	0	0	0	0	4	1	0	0	0	1	0	0
77	1	0	0	0	0	2	0	4	0	0	0	0	0	0	0	0	0	0	0	0	0	0	0	0	0	0	0	1	0	0	0	130	80	110	70	0	0	1	0	0	0	4	0	0	0	0	0	1	0
74	0	1	3	3	2	2	0	5	0	1	0	0	0	0	0	0	0	0	0	0	0	0	0	0	0	0	0	0	0	0	0	153	93	150	110	0	0	1	0	0	0	0	0	4	0	0	0	1	0
52	0	0	0	0	0	2	0	2	0	0	0	0	0	0	0	0	0	0	0	0	0	0	0	0	0	0	0	0	0	0	0	131	80	130	80	0	0	0	0	0	0	0	1	4	0	0	1	0	0
42	1	0	4	2	1	0	0	0	0	0	0	0	0	0	0	0	0	0	0	0	0	0	0	0	0	0	0	0	0	0	0	113	75	110	80	0	0	0	0	0	0	0	0	2	0	0	1	0	0
75	1	3	6	2	2	2	0	7	0	0	0	0	0	0	0	0	0	0	0	0	0	0	0	0	0	0	0	1	0	0	0	200	110	140	80	0	0	0	0	0	0	1	1	0	0	0	1	0	0
75	0	0	3	2	1	2	0	5	0	0	0	0	0	0	0	0	0	0	0	0	0	0	0	0	0	0	0	0	0	0	0	148	86	140	90	0	0	0	0	0	0	3	1	0	0	0	1	0	0
63	1	0	0	0	0	0	0	0	0	0	0	0	0	0	0	0	0	0	0	0	0	0	0	0	0	0	0	1	0	0	0	120	73	110	70	0	0	0	0	0	0	0	0	4	0	0	1	0	0
62	1	0	0	0	0	2	0	6	0	0	0	0	0	0	0	0	0	0	0	0	0	0	0	0	0	0	0	0	0	0	0	143	89	130	100	0	0	0	0	0	0	4	1	0	0	0	0	0	0
71	1	1	4	2	1	2	0	7	0	0	0	0	0	0	0	0	0	0	0	0	0	0	0	0	0	0	0	0	0	0	0	150	70	120	80	0	0	0	0	0	0	1	1	2	0	0	1	0	0
37	1	0	0	0	0	0	0	0	0	0	0	0	0	0	0	0	0	0	0	0	0	0	0	0	0	0	0	0	0	0	0	100	60	105	68	0	0	0	0	0	0	0	0	2	0	0	1	0	0
57	1	0	3	2	0	0	0	0	0	0	0	0	0	0	0	0	0	0	0	0	0	0	0	0	0	0	0	0	0	0	0	121	76	120	80	0	0	0	0	0	0	1	1	0	0	0	1	0	0
52	1	1	3	2	1	2	0	4	0	0	0	0	0	0	0	0	0	0	0	0	0	0	0	0	0	0	0	0	0	0	0	119	77	110	80	0	0	0	0	0	0	0	0	3	0	0	1	0	0
63	0	0	0	0	0	0	0	0	0	0	0	0	0	0	0	0	0	0	0	0	0	0	0	0	0	0	0	1	0	0	0	135	83	130	90	0	0	0	0	0	0	4	1	0	0	0	1	0	0
50	1	1	3	1	1	2	0	4	0	0	0	0	0	0	0	0	0	0	0	0	0	0	0	0	0	0	0	0	0	0	0	130	80	180	110	0	0	0	0	0	0	4	3	0	0	0	1	0	0
74	0	2	5	2	1	2	0	6	0	1	0	0	0	0	0	0	0	0	0	0	0	0	0	0	0	0	0	0	0	0	0	138	81	130	80	0	0	1	0	0	0	4	1	0	0	0	0	1	0
73	1	1	6	2	1	0	0	0	0	0	0	0	0	0	0	0	0	0	0	0	0	0	0	1	0	0	0	0	0	0	0	126	76	110	80	0	0	0	0	0	0	4	1	0	0	0	1	0	0
56	1	0	0	0	0	0	0	0	0	0	0	0	0	0	0	0	0	0	0	0	0	0	0	0	0	0	0	0	0	0	0	124	74	120	70	0	0	0	0	0	0	0	0	2	0	0	1	0	0
60	0	0	1	2	1	2	0	5	0	0	0	0	0	0	0	0	0	0	0	0	0	0	0	0	0	0	0	0	1	0	0	139	85	130	90	1	0	1	0	0	0	0	0	3	0	0	0	0	0
71	0	0	3	2	2	2	0	6	0	0	0	0	0	0	0	0	0	0	0	0	0	0	0	0	0	0	0	0	0	0	0	171	95	180	100	0	0	1	0	0	0	1	1	0	0	0	0	1	0
57	1	2	0	0	0	2	0	3	0	0	0	0	0	0	0	0	0	0	0	0	0	0	0	0	0	0	0	0	0	0	0	110	70	170	100	0	0	1	0	0	0	0	0	3	0	0	0	1	0
66	0	1	5	2	1	0	0	0	0	0	0	0	0	0	0	0	0	0	0	0	0	0	0	0	0	0	0	0	0	0	0	137	79	140	80	0	0	0	0	0	0	0	0	4	0	0	1	0	0
47	1	1	2	2	2	2	0	5	0	0	0	0	0	0	0	0	0	0	0	0	0	0	0	0	0	0	0	0	0	0	0	142	92	140	110	0	0	0	0	0	0	2	1	1	0	0	1	0	0
76	1	0	0	0	2	3	0	1	0	0	0	0	0	0	0	0	0	0	0	0	0	0	0	0	0	0	0	0	0	0	0	149	86	140	90	0	0	0	0	0	0	1	1	1	0	0	1	0	0
59	1	2	6	2	2	3	0	7	0	0	0	0	0	0	0	0	0	0	0	0	0	0	0	0	0	0	0	0	0	0	0	176	102	180	120	0	0	0	0	0	0	4	1	0	0	0	1	0	0
65	0	2	6	2	2	2	0	5	0	0	0	0	0	0	0	0	0	0	0	0	0	0	0	0	0	0	0	0	0	0	0	120	90	130	90	0	0	0	0	0	0	0	0	3	0	0	1	0	0
64	1	1	3	2	1	2	0	6	0	0	0	0	0	0	0	0	0	0	0	0	0	0	0	1	0	0	0	0	0	0	0	140	90	137	87	0	0	0	0	0	0	1	1	0	0	0	1	0	0
74	0	0	4	2	1	2	0	5	0	0	0	0	0	0	0	0	0	0	0	0	0	0	0	0	0	0	0	0	0	0	0	140	80	140	80	0	0	0	0	0	0	1	1	2	0	0	1	0	0
52	1	1	2	2	1	1	0	2	0	0	0	0	0	0	0	0	0	0	0	0	0	0	0	0	0	0	0	0	0	0	0	130	80	130	80	0	0	0	0	0	0	1	0	0	0	0	1	0	0
38	1	0	0	0	0	1	0	6	0	0	0	0	0	0	0	0	0	0	0	0	0	0	0	0	0	0	0	0	0	0	0	130	90	130	80	0	0	0	0	0	0	0	0	4	0	0	1	0	0
75	0	1	0	0	0	3	0	8	0	0	0	0	0	0	0	0	0	0	0	0	0	0	0	0	0	0	0	0	0	0	0	170	100	130	75	1	0	1	0	0	0	2	2	0	0	0	1	0	0
65	1	1	0	0	0	0	0	0	0	0	0	0	1	0	0	0	0	0	0	0	0	0	0	0	0	0	0	0	1	0	0	170	100	100	70	0	0	1	0	1	1	2	1	1	0	0	0	0	0
66	1	1	6	2	2	3	0	7	0	0	0	0	0	0	0	0	0	0	0	0	0	0	0	0	0	0	0	0	0	0	0	137	81	130	80	0	0	0	0	0	0	0	0	2	0	0	1	0	0
53	1	3	5	2	1	0	1	6	0	0	0	0	0	0	0	0	0	0	0	0	0	0	0	1	0	0	0	0	0	0	0	132	80	150	80	1	0	0	0	0	0	1	1	0	0	0	1	0	0
62	1	2	5	2	2	2	0	7	0	0	0	0	0	0	0	0	0	0	0	0	0	0	0	0	0	0	0	0	0	0	0	163	91	170	90	0	0	0	0	0	0	1	1	0	0	0	1	0	0
64	0	1	6	2	1	0	1	7	0	1	0	0	0	0	0	0	0	0	0	0	0	0	0	0	0	0	0	0	0	0	0	185	100	200	100	0	0	0	0	0	0	0	1	0	1	0	1	0	0
70	1	0	1	2	1	2	0	7	0	0	0	0	0	0	0	0	0	0	0	0	0	0	0	0	0	0	0	0	0	0	0	158	90	180	90	0	0	0	0	0	0	0	0	1	0	0	1	0	0
83	0	1	5	2	1	2	0	6	0	0	0	0	0	0	0	0	0	0	0	0	0	0	0	0	0	0	0	0	0	0	0	150	100	130	80	0	0	0	0	0	0	4	1	0	0	0	1	0	0
42	1	0	0	0	0	0	0	0	0	0	0	0	0	0	0	0	0	0	0	0	0	0	0	0	0	0	0	0	0	0	0	120	77	120	80	0	0	0	0	0	0	0	1	2	0	0	1	0	0
70	1	0	6	2	2	0	0	0	0	0	0	0	0	0	0	0	0	0	0	0	0	0	0	0	0	0	0	0	0	0	0	126	76	130	80	0	0	0	0	0	0	0	0	2	0	0	1	0	0
69	1	2	4	2	1	0	0	0	0	0	0	0	0	0	0	0	0	0	0	0	0	0	0	0	0	0	0	0	0	0	0	136	79	130	80	0	0	0	0	0	0	1	1	1	0	0	1	0	0
72	0	2	6	2	2	2	0	7	0	0	0	0	0	0	0	0	0	0	0	0	0	0	0	1	0	0	0	0	0	0	0	147	86	130	90	0	0	0	0	0	0	1	1	0	0	0	1	0	0
74	0	0	0	0	0	2	0	7	0	0	0	0	0	0	0	0	0	0	0	0	0	0	0	0	0	0	0	0	0	0	0	138	81	130	80	0	0	0	0	0	0	4	1	0	0	0	1	0	0
79	0	1	2	2	1	3	0	7	0	0	0	0	0	0	0	0	0	0	0	0	0	0	0	0	0	0	0	0	0	0	0	151	87	150	90	0	0	0	0	0	0	2	1	1	0	0	0	0	0
62	1	1	2	2	1	3	0	7	0	0	0	0	0	0	0	0	0	0	0	0	0	0	0	0	0	0	0	0	0	0	0	140	90	160	110	0	0	0	0	0	0	1	1	0	0	0	1	0	0
70	0	1	5	2	2	2	0	7	2	0	0	0	1	0	0	0	0	0	0	0	0	0	0	1	0	0	0	1	0	0	0	145	83	140	80	0	0	0	0	0	0	0	0	1	2	0	1	0	0
79	1	0	6	2	2	2	0	7	0	0	0	0	0	0	0	0	0	0	0	0	0	0	0	1	0	0	0	0	0	0	0	163	92	160	100	0	0	0	0	0	0	4	1	0	0	0	0	0	0
69	1	2	6	2	2	2	0	5	0	0	0	0	0	0	0	0	0	0	0	0	0	0	0	0	0	0	0	0	0	0	0	124	74	100	70	0	0	0	0	0	0	1	1	0	0	0	1	0	0
55	1	0	1	2	2	0	0	0	0	0	0	0	0	0	0	0	0	0	0	0	0	0	0	0	0	0	0	0	1	0	0	149	92	160	110	0	0	0	0	0	0	4	1	0	0	0	0	0	0
73	0	2	6	2	2	2	0	7	1	0	0	0	0	0	0	0	0	0	0	0	0	0	0	1	0	0	0	0	0	1	0	140	80	130	80	0	0	1	0	0	0	1	1	0	0	0	0	1	0
64	0	0	1	2	2	2	0	7	0	0	0	0	0	0	0	0	0	0	0	0	0	0	0	0	0	0	0	0	0	0	0	150	91	140	100	0	0	0	0	0	0	2	1	0	0	0	0	0	0
57	1	0	0	0	0	2	0	5	0	0	0	0	0	0	0	0	0	0	0	0	0	0	0	0	0	0	0	0	0	0	0	160	94	170	100	0	0	0	0	0	0	0	0	1	0	0	1	0	0
71	0	0	3	2	1	3	0	7	0	0	0	0	0	0	0	0	0	0	0	0	0	0	0	0	0	1	0	0	0	0	0	162	93	170	100	0	0	0	0	0	0	1	1	1	0	0	0	0	0
68	0	0	2	2	1	2	0	5	0	0	0	0	0	0	0	0	0	0	0	0	0	0	0	0	0	0	0	0	0	0	0	150	87	150	90	0	0	0	0	0	0	4	1	0	0	0	0	0	0
83	0	0	0	0	0	0	0	0	0	0	0	0	0	1	0	0	0	0	0	0	0	0	0	0	0	0	0	1	0	0	0	144	87	150	100	0	0	1	0	0	0	0	0	2	0	0	0	1	0
52	1	0	0	0	0	0	0	0	0	0	0	0	0	0	0	0	0	0	0	0	0	0	0	0	0	0	0	0	0	0	0	120	75	140	90	0	0	0	0	0	0	4	4	0	0	0	0	0	0
84	0	0	0	0	0	2	0	6	0	0	0	0	0	0	0	0	0	0	0	0	0	0	0	0	0	0	0	0	1	0	0	150	89	140	100	0	0	1	0	0	0	0	0	4	1	0	0	1	0
54	0	0	3	2	1	3	0	7	0	0	0	0	0	0	0	0	0	0	0	0	0	0	0	0	0	0	0	0	1	0	0	181	103	200	110	1	0	0	0	0	0	4	3	0	0	0	1	0	0
86	1	1	4	2	1	0	0	0	0	0	0	0	0	0	0	0	0	0	0	0	0	0	0	0	0	0	0	0	0	0	0	121	68	110	60	0	0	0	0	0	0	1	0	2	0	0	1	0	0
82	0	0	6	2	1	2	0	7	0	0	0	0	0	0	0	0	0	0	0	0	0	0	0	0	0	0	0	0	0	0	0	90	70	140	80	0	0	0	0	0	0	0	0	4	0	0	0	0	0
63	1	0	2	2	1	0	0	0	0	0	0	0	0	0	0	0	0	0	0	0	0	0	0	0	0	0	0	0	0	0	0	131	79	130	80	0	0	0	0	0	0	4	1	0	0	0	1	0	0
69	0	1	6	2	1	2	0	7	0	0	0	0	0	0	0	0	0	0	0	0	0	0	0	0	1	0	0	0	0	0	0	127	78	110	80	0	0	0	0	0	0	1	1	0	0	0	1	0	0
72	0	2	6	2	1	2	0	7	0	0	0	0	0	0	0	0	0	0	0	0	0	0	0	0	0	0	0	0	0	0	0	165	94	160	100	0	0	0	0	0	0	0	1	1	0	0	1	0	0
66	1	1	3	2	1	0	1	5	0	0	0	0	0	0	0	0	0	0	0	0	0	0	0	0	0	0	0	0	0	0	0	120	80	90	60	0	0	1	0	0	0	3	1	0	0	0	0	1	0
72	1	1	6	2	1	3	0	7	0	0	0	0	0	0	0	0	0	0	0	0	0	0	0	0	0	0	0	0	0	0	0	140	80	120	80	0	0	1	0	0	0	1	1	0	0	0	1	0	0
68	1	2	6	2	1	0	0	0	0	1	0	0	0	0	0	0	0	0	0	0	0	0	0	0	0	0	0	0	0	0	0	112	67	100	60	0	0	0	0	0	0	1	1	1	0	0	1	0	0
75	0	0	4	2	1	2	0	5	0	0	0	0	0	0	0	0	0	0	0	0	0	0	0	0	0	0	0	0	0	0	0	134	79	120	80	0	0	0	0	0	0	1	1	0	0	0	1	0	0
57	1	0	4	2	1	2	0	5	0	0	0	0	0	0	0	0	0	0	0	0	0	0	0	0	0	0	0	0	0	0	0	141	82	140	80	0	0	0	0	0	0	4	1	0	0	0	1	0	0
65	0	0	6	2	1	3	0	7	0	0	0	0	0	0	0	0	0	0	0	0	0	0	0	1	0	0	0	0	0	0	0	133	80	120	80	0	0	0	0	0	0	0	0	3	0	0	1	0	0
75	0	0	6	2	1	2	0	7	0	0	1	0	0	0	0	0	0	0	0	0	0	0	0	0	0	0	0	0	0	0	0	162	92	160	100	0	0	0	0	0	0	1	1	0	0	0	1	0	0
41	1	0	0	0	0	0	0	0	0	0	0	0	0	0	0	0	0	0	0	0	0	0	0	0	0	0	0	0	0	0	0	117	77	120	80	0	0	0	0	0	0	4	4	0	0	0	1	0	0
74	0	2	5	2	1	3	0	7	0	0	0	0	0	0	0	0	0	0	0	0	0	0	0	0	0	0	0	0	0	0	0	157	89	150	90	0	0	0	0	0	0	1	1	0	0	0	1	0	0
51	1	0	0	0	0	0	0	0	0	0	0	0	0	0	0	0	0	0	0	0	0	0	0	0	0	0	0	0	0	0	0	117	73	110	70	0	0	0	0	0	0	4	2	0	0	1	1	0	0
90	0	1	6	2	1	2	0	7	0	0	0	0	0	0	0	0	0	0	0	0	0	0	0	0	0	0	0	0	0	0	0	151	84	146	84	0	0	0	0	0	0	0	0	4	0	0	0	1	0
56	0	0	0	0	0	2	0	7	0	0	0	0	0	0	0	0	0	0	0	0	0	0	0	0	0	0	0	0	0	0	1	170	98	190	100	0	0	0	0	0	0	1	1	0	0	0	0	0	0
77	1	0	6	2	1	0	0	0	0	0	0	0	0	0	0	0	0	0	0	0	0	0	0	0	0	0	0	0	0	0	0	130	76	125	80	0	0	0	0	0	0	0	0	1	0	0	1	0	0
64	1	0	0	0	0	2	0	7	0	0	0	0	0	0	0	0	0	0	0	0	0	0	0	0	0	0	0	0	0	0	0	165	95	180	100	0	0	0	0	0	0	4	2	0	0	0	1	0	0
59	1	0	2	2	2	0	0	0	0	0	0	0	0	0	0	0	0	0	0	0	0	0	0	0	0	0	0	0	0	0	0	160	90	140	80	0	0	0	0	0	0	4	2	0	0	0	1	0	0
68	0	0	0	0	0	2	0	5	0	0	0	0	0	0	0	0	0	0	0	0	0	0	0	0	0	1	0	0	0	0	0	120	80	120	80	0	0	0	0	0	0	0	1	4	1	0	0	0	0
55	0	2	6	2	2	2	0	7	2	0	0	0	0	0	0	0	0	0	0	0	0	0	0	0	1	0	0	0	0	0	0	134	81	133	80	0	0	0	0	0	0	0	0	2	0	0	1	0	0
63	1	3	6	2	1	0	0	0	0	0	0	0	0	0	0	0	0	0	0	0	0	0	0	0	0	0	0	1	0	0	0	80	60	100	70	0	0	0	0	0	0	0	1	2	0	0	0	0	0
70	0	0	6	2	2	2	0	7	0	0	0	0	0	0	0	0	0	0	0	0	0	0	0	1	0	0	0	0	0	0	0	156	88	150	90	0	0	0	0	0	0	4	1	0	0	0	1	0	0
66	0	0	0	0	2	2	0	5	0	0	0	0	0	0	0	0	0	0	0	0	0	0	0	0	0	0	0	1	0	0	0	144	83	135	80	0	0	0	0	0	0	0	0	1	0	0	1	0	0
66	0	0	5	2	1	2	0	7	0	0	0	0	0	0	0	0	0	0	0	0	0	0	0	1	0	0	0	0	0	0	0	140	84	140	90	0	0	0	0	0	0	4	3	0	0	0	1	0	0
70	0	0	5	2	1	3	0	7	0	0	0	0	0	0	0	0	0	0	0	0	0	0	0	0	1	0	0	0	0	0	0	154	89	160	90	0	0	0	0	0	0	1	1	4	0	0	1	0	0
60	0	1	2	2	2	2	0	1	0	0	0	0	0	0	0	0	0	0	0	0	0	0	0	0	0	0	0	0	0	0	0	147	89	140	100	0	0	0	0	0	0	1	1	0	0	0	1	0	0
60	1	2	6	2	1	2	0	5	0	0	0	0	0	0	0	0	0	0	0	0	0	0	0	0	0	0	0	0	0	0	0	151	88	150	90	0	0	0	0	0	0	0	0	2	1	0	1	0	0
62	0	0	6	2	1	3	0	7	0	0	0	0	0	0	0	0	0	0	0	0	0	0	0	0	0	0	0	0	0	0	0	174	91	190	80	0	0	0	0	0	0	1	1	0	0	0	1	0	0
44	1	1	3	3	2	2	0	7	0	0	0	0	0	0	0	0	0	0	0	0	0	0	0	0	0	0	0	0	0	0	0	145	88	140	90	0	0	0	0	0	0	0	1	0	1	0	1	0	0
53	1	0	1	2	1	0	1	1	0	0	0	0	0	0	0	0	0	0	0	0	0	0	0	0	0	0	0	0	0	0	0	150	90	160	100	0	0	0	0	0	0	1	1	0	0	0	1	0	0
74	0	0	6	2	2	2	0	7	0	0	0	0	0	0	0	0	0	0	0	0	0	0	0	1	0	0	0	0	0	0	0	140	80	139	82	0	0	0	0	0	0	0	0	2	2	0	1	0	0
38	1	1	2	2	2	0	0	0	0	0	0	0	0	0	0	0	0	0	0	0	0	0	0	0	0	0	0	0	0	0	0	112	72	110	70	0	0	0	0	0	0	1	1	0	0	0	1	0	0
55	1	0	5	2	2	0	0	0	0	0	0	0	0	0	0	0	0	0	0	0	0	0	0	0	0	0	0	0	0	0	0	130	80	120	80	0	0	0	0	0	0	1	1	1	0	0	1	0	0
64	0	1	2	3	2	2	0	7	0	0	0	0	0	0	0	0	0	0	0	0	0	0	0	1	0	0	0	0	0	0	0	162	94	170	100	0	0	0	0	0	0	1	1	0	0	0	0	0	0
34	1	0	4	2	1	0	0	0	0	0	0	0	0	0	0	0	0	0	0	0	0	0	0	0	0	0	0	0	0	0	0	118	78	120	85	0	0	0	0	0	0	0	1	2	0	0	1	0	0
77	0	0	4	2	1	2	0	7	0	0	0	0	0	0	0	0	0	0	0	0	0	0	0	0	0	0	0	0	0	0	0	152	88	140	90	0	0	0	0	0	0	0	1	1	0	0	1	0	0
47	0	1	2	2	2	3	0	7	0	0	0	0	0	0	0	0	0	0	0	0	1	0	0	0	0	0	0	0	0	0	0	181	106	200	120	0	0	0	0	0	0	1	1	0	0	0	1	0	0
66	1	0	0	0	2	2	0	7	0	0	0	0	0	0	0	0	0	0	0	0	0	0	0	0	0	0	0	0	0	0	1	171	99	170	110	0	0	0	0	0	0	1	1	0	0	0	1	0	0
34	1	0	2	2	1	2	0	1	0	0	0	0	0	0	0	0	0	0	0	0	0	0	0	0	0	0	0	0	0	0	0	121	78	120	80	0	0	0	0	0	0	0	1	3	0	0	1	0	0
71	0	2	6	3	1	2	0	7	0	0	0	0	0	0	0	0	0	0	0	0	0	0	0	1	0	0	0	0	0	0	0	151	87	140	90	0	0	0	0	0	0	0	0	1	1	0	1	0	0
51	1	0	3	2	1	0	0	0	0	0	0	0	0	0	0	0	0	0	0	0	0	0	0	0	0	0	0	0	0	0	0	119	76	110	80	0	0	0	0	0	0	0	0	2	0	0	1	0	0
63	0	0	0	0	0	2	0	2	0	0	0	0	0	0	0	0	0	0	0	0	0	0	0	0	0	0	0	0	0	0	0	144	86	140	90	0	0	0	0	0	0	1	1	1	0	0	1	0	0
59	1	0	0	0	0	0	0	0	0	0	0	0	0	0	0	0	0	0	0	0	0	0	0	0	0	0	0	0	0	0	0	127	79	130	80	0	0	0	0	0	0	0	0	4	2	0	1	0	0
65	0	1	6	2	2	2	0	7	0	0	0	0	0	0	0	0	0	0	0	0	0	0	0	0	0	0	0	0	0	0	0	149	87	150	90	0	0	0	0	0	0	0	0	2	1	0	1	0	0
67	1	0	6	2	2	0	0	0	0	0	0	0	0	0	0	0	0	0	0	0	0	0	0	0	0	0	0	0	0	0	0	136	79	140	80	0	0	0	0	0	0	0	0	2	1	0	1	0	0
71	0	0	2	2	1	2	0	7	0	0	0	0	0	0	0	0	0	0	0	0	0	0	0	0	0	0	0	0	0	0	0	160	90	150	80	0	0	0	0	0	0	0	0	4	0	0	1	0	0
69	0	2	6	2	2	2	0	7	0	0	0	0	0	0	0	0	0	0	0	0	0	0	0	0	0	0	0	1	0	0	0	163	94	170	100	0	0	0	0	0	0	0	1	0	2	0	1	0	0
56	0	0	6	2	2	2	0	7	0	0	0	0	0	0	0	0	0	0	0	0	0	0	0	1	0	0	0	1	0	0	0	80	60	100	60	0	0	0	0	0	0	0	1	0	1	0	1	0	0
58	0	3	0	0	0	0	0	0	0	0	0	0	0	0	0	0	0	0	0	0	0	0	0	0	0	0	0	0	0	0	0	123	75	110	70	0	0	0	0	0	0	1	1	1	0	0	0	0	0
57	1	0	0	0	0	0	0	0	0	0	0	0	0	0	0	0	0	0	0	0	0	0	0	0	0	0	0	0	0	0	0	100	60	100	70	0	0	0	0	0	1	0	0	3	0	0	1	0	0
60	0	0	5	2	1	2	0	6	0	0	0	0	0	0	0	0	0	0	0	0	0	0	0	1	0	0	0	0	0	1	0	173	96	190	100	0	0	0	0	0	0	0	0	3	1	0	1	0	0
72	1	1	5	2	2	0	0	0	0	0	0	0	0	0	0	0	0	0	0	0	0	0	0	0	0	0	0	0	1	0	0	124	72	120	70	0	1	0	0	0	0	0	0	4	0	0	0	0	1
44	1	0	2	2	1	1	0	0	0	0	0	0	0	0	0	0	0	0	0	0	0	0	0	0	0	0	0	0	0	0	0	129	81	131	84	0	0	0	0	0	0	0	0	2	0	0	1	0	0
80	0	3	2	3	1	2	0	7	3	0	0	0	0	0	0	0	0	0	0	0	0	0	0	1	0	0	0	0	0	0	0	129	75	110	70	0	0	0	0	0	0	2	1	1	0	0	1	0	0
78	0	0	2	2	2	2	0	5	0	0	0	0	0	0	0	0	0	0	0	0	0	0	0	1	0	0	0	0	0	0	0	140	100	145	91	0	0	0	0	0	0	1	1	0	0	0	1	0	0
60	1	0	0	0	2	0	0	0	0	0	0	0	0	0	0	0	0	0	0	0	0	0	0	0	0	0	0	0	0	0	0	134	74	140	60	0	0	0	0	0	0	1	1	1	0	0	1	0	0
70	0	1	1	2	1	2	0	7	0	0	0	0	0	0	0	0	0	0	0	0	0	0	0	0	0	0	0	1	0	0	0	180	90	164	93	0	0	0	0	0	0	1	1	0	0	0	1	0	0
55	0	0	3	2	1	2	0	1	0	0	0	0	0	0	0	0	0	0	0	0	0	0	0	0	0	0	0	0	0	0	0	127	79	120	80	0	0	0	0	0	0	1	1	1	0	0	1	0	0
75	0	0	4	2	1	0	0	0	0	0	0	0	0	0	0	0	0	0	0	0	0	0	0	1	0	0	0	0	0	0	0	150	100	140	90	0	0	0	0	0	1	0	0	4	0	0	0	0	0
55	1	0	0	0	2	2	0	4	0	0	0	0	0	0	0	0	0	0	0	0	0	0	0	0	0	0	0	0	0	0	0	150	80	130	80	0	0	0	0	0	0	0	0	1	0	0	1	0	0
57	1	0	6	2	2	2	0	7	0	0	0	0	0	0	0	0	0	0	0	0	0	0	0	0	0	0	0	0	0	0	0	210	120	160	100	0	0	0	0	0	0	4	1	0	0	0	1	0	0
65	0	2	6	2	2	2	0	7	0	0	0	0	0	0	0	0	0	0	0	0	0	0	0	0	0	0	0	0	0	0	0	138	80	120	80	0	0	0	0	0	0	1	1	1	0	0	0	0	0
65	1	1	6	2	2	2	0	6	3	0	0	0	0	0	0	0	0	0	0	0	0	0	0	0	0	0	0	0	0	0	0	187	99	220	100	1	0	0	0	0	0	0	0	1	0	0	0	0	0
53	0	0	1	1	1	2	0	5	0	0	0	0	0	0	0	0	0	0	0	0	0	0	0	0	0	0	0	0	0	0	0	132	83	140	90	0	0	0	0	0	0	3	3	0	0	0	1	0	0
76	0	1	1	2	1	3	0	7	1	0	0	0	0	0	0	0	0	0	0	0	0	0	0	1	0	0	0	0	0	0	0	130	90	140	80	0	0	0	0	0	0	0	0	2	0	0	1	0	0
56	0	0	0	0	0	2	0	6	0	0	0	1	0	0	0	0	0	0	0	0	0	0	0	0	0	0	0	0	0	0	0	60	40	140	100	0	0	1	0	0	0	1	1	0	0	0	1	0	0
80	0	1	4	2	1	0	0	0	1	0	0	0	0	0	0	0	0	0	0	0	0	0	0	1	0	0	0	0	0	0	0	70	30	100	60	1	1	0	0	0	0	0	0	1	0	0	1	0	0
74	1	1	3	2	2	0	0	0	0	0	0	0	0	0	0	0	0	0	0	0	0	0	0	0	0	0	1	0	0	0	0	60	20	80	60	0	1	0	0	0	0	0	0	4	0	0	0	0	0
69	1	1	5	1	2	3	0	7	0	0	0	0	0	0	0	0	0	0	0	0	0	0	0	1	0	0	0	0	0	0	0	141	87	140	100	0	0	0	0	0	0	4	0	4	0	1	1	0	0
54	0	0	3	1	1	0	0	0	3	0	0	0	0	0	0	0	0	0	0	0	0	0	0	0	0	0	0	0	0	0	0	130	90	140	90	0	0	1	0	0	0	1	1	0	0	0	0	1	0
61	1	1	5	3	2	2	0	2	0	0	0	0	0	0	0	0	0	0	0	0	0	0	0	0	0	0	0	0	0	0	0	145	90	160	110	0	0	0	0	0	0	4	1	0	0	0	1	0	0
75	0	1	3	2	1	0	0	0	0	0	0	0	0	0	0	0	0	0	0	0	0	0	0	0	0	0	0	0	0	0	0	83	53	60	40	0	0	0	0	0	0	0	1	2	1	0	1	0	0
56	1	0	0	0	0	3	0	6	0	0	0	0	0	0	0	0	0	0	0	0	0	0	0	0	0	0	0	0	0	0	1	80	60	110	80	0	0	0	0	0	0	2	1	0	0	0	0	0	0
65	1	3	5	2	2	3	0	8	0	0	0	0	0	0	0	0	0	0	0	0	0	0	0	0	0	0	1	0	0	0	0	140	80	180	100	0	0	0	0	0	0	4	1	0	0	0	1	0	0
50	1	1	1	2	1	1	0	1	0	0	0	0	0	0	0	0	0	0	0	0	0	0	0	0	0	0	1	0	0	0	0	180	100	140	90	0	0	0	0	0	0	0	0	4	0	0	1	0	0
74	0	1	6	2	1	2	0	7	0	0	0	0	0	0	0	0	0	0	0	0	0	0	0	0	0	0	0	0	0	0	0	190	100	130	100	1	0	0	0	0	0	4	0	0	0	0	0	0	0
80	0	0	0	0	2	2	0	1	0	0	0	0	1	0	0	0	0	0	0	0	1	0	0	1	0	0	0	0	0	0	0	155	87	160	90	0	0	0	0	0	0	4	1	0	0	0	1	0	0
81	0	0	0	0	0	3	1	5	0	0	0	0	0	0	0	0	0	0	0	0	0	0	0	0	0	0	0	0	0	0	0	140	84	130	90	0	0	0	0	0	0	4	1	0	0	0	0	0	0
52	0	1	0	0	0	3	0	7	0	0	0	0	0	0	0	0	0	0	0	0	0	0	0	1	0	0	0	0	0	0	0	80	60	100	70	0	0	0	0	0	0	4	1	0	0	0	1	0	0
85	1	2	5	2	2	0	0	0	0	0	0	0	0	0	0	0	0	0	0	0	0	0	0	0	0	0	1	0	0	0	0	120	90	120	90	0	0	0	0	0	0	1	1	2	0	0	1	0	0
65	1	0	0	0	0	0	0	0	1	0	0	0	0	0	0	0	0	0	0	0	0	0	0	0	0	0	0	0	0	0	0	110	66	100	60	0	0	1	0	0	0	4	1	0	0	0	0	1	0
75	0	1	5	3	1	2	0	6	4	0	1	0	0	0	0	0	0	0	0	0	0	0	0	1	0	0	0	0	0	0	0	112	68	90	65	1	0	0	0	0	0	4	1	0	0	0	0	0	0
64	1	1	3	2	2	2	0	6	0	0	0	0	0	0	0	0	0	0	0	0	0	0	0	0	0	0	0	0	0	0	0	110	70	110	70	0	0	0	0	0	0	4	1	0	0	0	1	0	0
76	1	0	6	3	2	3	0	7	3	0	0	0	0	0	0	0	0	0	0	0	0	0	0	0	0	0	0	0	0	0	0	130	80	160	100	0	0	0	0	0	0	4	1	0	0	0	1	0	0
70	0	1	0	0	1	2	0	6	0	0	0	0	0	0	0	0	0	0	0	0	0	0	0	0	0	0	0	0	0	0	0	130	75	110	70	0	0	0	0	0	0	0	0	4	0	0	1	0	0
82	0	1	6	2	1	0	1	7	0	0	0	0	0	0	0	0	0	0	0	0	0	0	0	0	0	0	0	0	0	0	0	149	85	140	90	0	0	0	0	0	0	4	2	-1	0	0	1	0	0
69	0	2	5	3	2	3	0	7	4	0	0	0	0	0	0	0	0	1	0	0	0	0	0	0	0	0	0	0	0	0	0	110	80	110	70	0	0	0	0	0	0	0	0	2	0	1	1	0	0
53	1	1	1	1	1	2	0	1	0	0	0	0	0	0	0	0	0	0	0	0	0	0	0	0	0	0	0	0	0	0	0	70	55	70	50	0	0	0	0	0	0	4	1	0	0	0	1	0	0
76	0	3	5	3	1	3	0	7	3	0	0	0	0	0	0	0	0	0	0	0	0	0	0	1	0	0	0	0	0	0	0	172	101	180	120	1	0	0	0	0	0	0	0	1	1	0	0	0	0
73	1	1	5	2	2	0	0	0	0	0	0	0	0	0	0	0	0	0	0	0	0	0	0	0	0	0	0	0	0	0	0	130	80	140	90	1	0	0	0	0	0	0	0	4	0	0	0	0	0
62	1	0	5	2	2	3	0	7	0	0	0	0	0	0	0	0	0	0	0	0	0	0	0	0	0	0	0	1	0	0	0	130	80	110	70	0	0	0	0	0	0	2	1	0	0	0	0	0	0
54	0	0	3	2	2	2	0	6	0	0	0	0	0	0	0	0	0	0	0	0	0	0	0	1	0	0	0	0	0	0	0	129	76	130	70	1	0	0	0	0	0	4	3	0	0	0	0	0	0
82	0	0	6	2	2	0	0	0	0	0	0	0	0	0	0	0	0	0	0	0	0	0	0	0	0	0	1	0	0	0	0	125	72	118	72	0	0	0	0	0	0	4	1	0	0	0	0	0	1
68	0	0	5	2	2	0	1	7	0	0	0	0	0	0	0	0	0	0	0	0	0	0	0	1	1	0	1	0	0	0	0	140	81	140	80	0	0	0	0	0	0	0	0	4	1	1	1	0	0
66	1	0	6	2	2	2	0	7	0	0	0	0	0	0	0	0	0	0	0	0	0	0	0	0	0	0	1	0	0	0	0	170	80	130	70	1	0	0	0	0	0	0	0	4	1	1	0	0	1
64	0	1	1	2	2	2	0	6	1	0	0	0	0	0	0	0	0	0	0	0	0	0	0	0	0	0	0	0	0	0	0	110	70	110	70	1	0	0	0	0	0	0	0	4	3	0	0	0	0
65	1	1	6	2	1	2	0	7	0	0	0	0	0	0	0	0	0	0	0	0	0	0	0	0	0	0	0	0	0	0	0	102	59	80	40	0	0	1	0	0	0	0	1	4	0	0	0	1	0
66	0	0	0	0	2	3	0	7	0	0	0	0	0	0	0	0	0	0	0	0	0	0	0	0	0	0	0	0	0	0	0	160	90	170	110	0	0	0	0	0	0	4	2	0	0	0	1	0	0
80	1	3	5	2	2	3	0	7	0	0	0	0	0	0	0	0	0	0	0	0	1	0	0	0	0	0	0	0	0	0	0	98	58	60	40	0	1	0	0	0	0	3	2	0	0	0	1	0	0
71	0	1	3	3	2	3	0	6	0	0	0	0	0	0	0	0	0	0	0	0	0	0	0	0	0	0	0	0	0	0	0	121	76	110	80	0	0	0	0	0	0	0	1	4	0	1	0	0	0
55	1	0	0	0	0	0	0	0	0	0	0	0	0	0	0	0	0	0	0	0	0	0	0	0	0	0	0	1	0	0	0	95	64	80	60	0	0	0	0	0	0	0	0	4	0	0	0	0	1
63	0	0	4	2	2	3	0	6	0	0	0	0	0	0	0	0	0	0	0	0	0	0	0	0	0	0	0	0	0	0	0	180	90	240	110	0	0	0	0	0	0	4	1	0	0	0	0	0	0
61	0	2	3	3	1	3	0	6	0	0	0	0	0	0	0	0	0	0	0	0	0	0	0	1	0	0	0	0	0	0	0	142	91	130	110	0	0	0	0	0	0	4	1	0	0	0	1	0	0
69	0	0	0	0	2	3	0	5	0	0	0	0	0	0	0	0	0	0	0	0	0	0	0	0	0	0	0	0	0	0	0	179	110	190	140	0	0	0	0	0	0	0	0	4	0	0	0	0	0
69	0	2	5	2	2	2	0	6	2	0	0	1	0	0	0	0	1	0	0	0	0	0	0	0	0	0	0	0	0	0	0	133	82	130	90	0	0	1	0	0	0	4	2	0	0	0	0	0	0
64	0	0	2	1	1	3	0	5	0	0	0	0	0	0	0	0	0	0	0	0	0	0	0	0	0	0	1	0	0	0	0	122	78	110	80	0	0	0	0	0	0	0	0	4	0	0	0	0	1
75	0	0	6	2	2	0	1	6	0	0	0	0	0	0	0	0	0	0	0	0	0	0	0	0	0	0	1	0	0	0	0	166	96	180	110	0	0	0	0	0	0	0	1	4	0	1	0	0	0
71	1	1	5	1	2	3	0	7	0	0	0	0	0	0	0	0	0	0	0	0	0	0	0	0	0	0	0	0	0	0	0	169	92	180	90	0	0	0	0	0	0	0	1	3	0	0	1	0	0
62	0	0	6	2	1	3	0	6	0	0	0	0	0	0	0	0	0	0	0	0	0	0	0	1	0	0	0	0	0	0	0	240	120	200	110	0	0	0	0	0	0	0	0	4	2	0	1	0	0
78	1	0	0	0	0	2	0	3	0	0	0	0	0	0	0	0	0	0	0	0	0	0	0	0	0	0	0	0	0	0	0	143	81	140	80	0	0	0	0	0	0	4	2	0	0	0	1	0	0
67	1	1	5	2	1	3	0	6	0	0	0	0	0	0	0	0	0	0	0	0	0	0	0	0	1	0	0	0	0	0	0	190	100	120	80	1	0	0	0	0	0	4	1	0	0	0	1	0	0
79	1	0	6	2	2	2	0	6	2	0	0	0	0	1	0	0	0	0	0	0	0	0	0	0	0	0	0	0	0	0	0	145	86	160	100	0	0	1	0	0	0	1	1	0	0	0	0	1	0
75	0	1	5	2	1	3	0	6	0	0	0	0	0	0	0	0	0	0	0	0	0	0	0	0	0	0	0	0	0	0	0	170	90	180	90	0	0	0	0	0	0	0	0	4	0	0	1	0	0
52	1	0	0	0	2	2	0	0	0	0	0	0	0	0	0	0	0	0	0	0	0	0	0	0	0	0	0	0	0	0	0	140	90	120	80	0	0	0	0	0	0	4	3	0	0	0	1	0	0
65	0	0	0	0	2	2	0	6	0	0	0	0	0	0	0	0	0	0	0	0	0	0	0	1	0	0	1	0	0	0	0	135	80	130	80	0	0	0	0	0	0	4	3	0	0	0	0	0	0
58	0	0	4	2	1	0	1	7	0	0	0	0	0	0	0	0	0	0	0	0	0	0	0	1	0	0	0	0	0	0	0	170	100	160	100	0	0	0	0	0	0	4	2	0	0	0	1	0	0
82	0	1	5	2	2	3	0	7	0	0	0	0	0	0	0	0	0	0	0	0	0	0	0	0	0	0	0	0	0	0	0	94	56	60	40	0	0	0	0	0	0	0	0	1	4	0	1	0	0
65	0	0	3	2	1	3	0	2	0	0	0	0	0	1	0	0	0	0	0	0	0	0	0	1	1	0	0	0	0	0	0	90	60	160	100	0	0	1	0	0	0	4	2	0	0	0	0	1	0
72	1	1	1	2	1	2	0	7	0	0	0	0	0	0	0	0	0	0	0	0	0	0	0	0	0	0	0	0	0	0	0	111	68	80	60	0	0	0	0	0	0	4	0	4	0	1	1	0	0
76	1	0	0	0	0	0	0	0	0	0	0	0	0	0	0	0	0	0	0	0	0	0	0	0	0	0	0	1	0	0	0	160	90	140	90	0	0	0	0	0	0	4	1	0	0	0	1	0	0
83	1	1	0	0	2	2	0	7	0	0	0	0	0	0	0	0	0	0	0	0	0	0	0	0	0	0	0	0	0	0	0	134	79	130	80	0	0	0	0	0	0	4	1	0	0	0	0	0	0
58	1	0	0	0	0	2	0	1	0	0	0	0	0	0	0	0	0	0	0	0	0	0	0	0	0	0	0	0	0	0	0	130	80	130	80	0	0	0	0	0	0	0	4	3	3	0	1	0	0
52	1	1	0	0	0	0	0	0	0	0	0	0	0	0	0	0	0	0	0	0	0	0	0	0	0	0	1	0	0	0	0	40	0	60	50	0	1	0	0	0	0	4	1	0	0	0	0	1	0
75	0	1	1	2	1	2	0	7	0	0	0	0	0	0	0	0	0	0	0	0	0	0	0	1	0	0	0	0	0	0	0	148	83	150	80	0	0	0	0	0	0	4	2	0	0	0	0	0	0
70	1	1	6	2	2	2	0	6	0	0	0	0	0	0	0	0	0	0	0	0	0	0	0	0	0	0	0	0	0	0	0	110	70	110	70	0	0	0	0	0	0	4	4	0	0	0	0	0	0
69	0	0	0	0	2	2	0	6	0	0	0	0	0	0	0	0	0	0	0	0	0	0	0	1	0	0	0	0	0	0	0	119	74	110	70	0	0	0	0	0	0	4	2	0	0	0	0	0	0
77	0	0	3	2	2	3	0	7	1	0	0	0	0	1	0	0	0	0	0	0	0	0	0	0	0	0	0	0	0	0	0	150	86	150	90	0	0	1	0	0	0	1	1	0	0	0	0	1	0
82	1	1	4	2	1	0	0	0	1	0	0	0	0	0	0	0	0	0	0	0	0	0	0	0	0	0	0	0	0	0	0	80	40	120	80	0	0	0	0	0	0	1	1	0	0	0	1	0	0
67	0	1	0	0	2	2	0	1	0	0	0	0	0	0	0	0	0	0	0	0	0	0	0	1	0	0	0	0	0	0	0	170	100	130	90	0	0	0	0	0	0	4	2	0	0	0	1	0	0
77	1	3	6	2	1	3	0	7	0	0	0	0	0	0	0	0	0	0	0	0	0	0	0	0	0	0	1	0	0	0	0	120	70	110	70	0	0	0	0	0	0	0	1	2	0	0	1	0	0
70	1	1	5	1	1	2	0	3	0	1	0	0	0	0	0	0	0	0	0	0	0	0	0	0	0	0	0	0	0	0	0	200	100	190	100	0	0	0	0	0	0	4	2	0	0	0	1	0	0
77	0	0	0	0	2	2	0	7	1	0	0	0	0	1	0	0	0	0	0	0	0	0	0	0	0	0	0	0	0	0	0	133	79	120	80	0	0	1	0	0	0	0	0	1	1	0	0	1	0
63	0	1	0	0	2	2	0	6	0	0	0	0	0	0	0	0	0	0	0	0	0	0	0	1	0	0	0	0	0	0	0	140	90	160	90	0	0	0	0	0	0	0	0	4	1	0	1	0	0
66	0	2	1	2	2	2	0	7	3	0	0	0	0	0	0	0	0	0	0	0	0	0	0	1	0	0	0	0	0	0	0	151	91	160	100	1	0	0	0	0	0	0	2	2	0	0	0	0	0
55	1	0	1	2	2	3	0	5	1	0	0	0	0	1	0	0	0	0	0	0	0	0	0	0	0	0	0	0	0	0	0	170	100	220	140	0	0	1	0	0	0	4	1	2	0	0	0	1	0
64	0	0	5	3	2	0	0	0	0	0	0	0	0	0	0	0	0	0	0	0	0	0	0	0	0	0	0	0	0	0	0	140	80	110	70	1	0	0	0	0	0	0	0	2	2	0	0	1	0
55	1	0	6	2	2	0	0	0	0	0	0	0	0	0	0	0	0	0	0	0	0	0	0	0	0	0	0	0	1	0	0	80	60	120	90	0	0	1	0	0	0	4	1	0	0	0	0	1	0
63	0	1	6	3	2	2	0	5	0	0	0	0	0	0	0	0	0	0	0	0	0	0	0	0	0	0	0	0	0	0	0	50	20	70	40	0	1	0	0	0	0	0	1	4	0	0	0	0	0
46	1	0	6	2	2	0	0	0	0	0	0	0	0	0	0	0	0	0	0	0	0	0	0	0	0	0	0	0	0	0	0	127	77	120	80	0	0	0	0	0	0	4	1	0	0	0	1	0	0
75	1	0	0	0	2	0	0	0	0	0	0	0	0	0	0	0	0	0	0	0	0	0	0	0	0	0	0	1	0	0	0	110	60	80	40	0	0	0	0	0	0	4	2	0	0	0	0	0	1
74	0	0	1	2	2	0	0	0	0	0	0	0	0	0	0	0	0	0	0	0	0	0	0	0	0	0	0	0	0	0	0	130	80	127	78	0	1	0	0	0	1	4	4	0	0	0	0	0	0
67	1	1	2	3	2	2	0	4	0	0	0	0	0	0	0	0	0	0	0	0	0	0	0	0	0	0	0	0	0	0	0	110	70	120	80	1	0	0	0	0	0	0	0	2	2	0	0	0	0
76	1	1	6	2	2	2	0	4	0	0	0	0	0	0	0	0	0	0	0	0	0	0	0	0	0	0	0	0	0	0	0	80	60	60	50	0	1	1	0	0	0	0	0	4	3	0	0	1	0
66	0	1	3	2	1	0	1	5	0	0	0	0	0	0	0	0	0	0	0	0	0	0	0	0	1	0	0	0	0	0	0	70	30	60	20	0	1	0	0	0	0	0	0	4	0	1	0	0	0
65	0	1	3	2	1	2	0	5	0	0	0	0	0	0	0	0	0	0	0	0	0	0	0	1	0	0	0	0	0	0	0	150	100	100	60	0	0	0	0	0	0	0	0	4	0	0	0	0	0
51	1	1	3	2	2	0	0	0	0	0	0	0	0	0	0	0	0	0	0	0	0	0	0	0	0	0	0	0	0	0	0	60	20	0	0	0	1	0	0	0	0	4	1	0	0	0	0	0	0
68	1	3	6	2	2	0	0	0	1	0	0	0	0	0	0	0	0	0	0	0	0	0	0	0	0	0	0	0	0	0	0	66	37	40	0	0	1	0	0	0	0	4	1	0	0	0	1	0	0
90	0	0	6	2	2	0	0	0	0	0	0	0	0	0	0	0	0	0	0	0	0	0	0	0	0	0	0	0	0	0	0	160	65	110	80	0	0	0	0	0	0	4	1	0	0	0	1	0	0
63	1	0	6	2	1	2	0	2	0	0	0	0	0	0	0	0	0	0	0	0	0	0	0	0	0	0	0	0	0	0	0	170	90	120	80	0	0	0	0	0	0	0	1	4	2	0	0	0	1
64	1	0	0	0	2	2	0	6	0	0	0	0	0	0	0	0	0	0	0	0	0	0	0	1	0	0	0	0	0	0	0	129	77	120	70	0	0	0	0	0	0	4	1	0	0	0	1	0	0
63	0	0	1	2	2	0	0	0	0	0	0	0	0	0	0	0	0	0	0	0	0	0	0	0	0	0	0	0	0	0	0	127	78	130	80	0	0	0	0	0	0	2	1	0	0	0	0	0	0
63	1	1	6	2	2	2	0	5	0	0	0	0	0	0	0	0	0	0	0	0	0	0	0	1	1	0	0	0	0	0	0	130	80	100	70	0	0	0	0	0	0	0	2	4	0	0	1	0	0
43	1	0	3	2	2	0	0	0	0	0	0	0	0	0	0	0	0	0	0	0	0	0	0	0	0	0	0	0	0	0	0	120	78	130	90	0	0	0	0	0	0	4	3	0	0	0	0	0	0
65	0	2	3	2	1	2	0	5	0	0	0	0	0	0	0	0	0	0	0	0	0	0	0	0	0	0	0	0	0	0	0	110	70	80	60	1	0	0	0	0	0	0	0	4	3	0	0	0	0
50	1	0	0	0	0	2	0	4	0	0	0	0	0	0	0	0	0	0	0	0	0	0	0	0	0	0	0	0	0	1	0	150	90	141	89	0	0	0	0	0	0	4	1	0	0	0	1	0	0
67	1	0	1	2	2	3	0	2	0	0	0	1	0	0	0	0	0	0	0	0	0	0	0	1	0	0	0	0	0	0	0	117	74	110	80	0	0	0	0	0	0	0	0	4	0	1	0	0	0
69	0	0	1	2	2	2	0	3	0	0	0	0	0	0	0	0	0	0	0	0	0	0	0	1	0	0	0	0	0	0	0	40	20	100	80	0	0	1	0	0	0	4	1	2	0	1	0	0	0
69	1	1	6	2	0	2	0	7	0	0	0	0	0	0	0	0	0	0	0	0	0	0	0	1	0	0	0	0	0	0	0	140	30	140	20	0	1	0	0	0	0	0	0	4	2	0	0	0	0
66	0	0	0	0	2	2	0	7	0	0	0	0	0	0	0	0	0	0	0	0	0	0	0	1	0	0	0	0	0	0	0	140	80	170	105	0	0	0	0	0	0	4	1	0	0	0	1	0	0
62	0	0	0	0	2	2	0	5	0	0	0	0	0	0	0	0	0	0	0	0	0	0	0	0	0	0	0	0	0	1	0	90	60	60	40	0	1	0	0	0	0	0	2	0	4	0	0	0	0
66	1	0	6	2	0	2	0	6	0	0	0	0	0	1	0	0	0	0	0	0	0	0	0	0	0	0	0	0	0	0	0	140	90	180	100	0	0	1	0	0	0	0	1	4	2	0	0	1	0
73	0	0	3	2	2	0	0	0	2	0	0	0	0	1	0	0	0	0	0	0	0	0	0	0	0	0	0	0	0	0	0	129	77	130	80	0	0	1	0	0	0	0	1	4	0	0	0	0	0
63	1	0	5	2	2	2	0	6	0	0	0	0	0	0	0	0	0	0	0	0	0	0	0	0	0	0	0	0	0	0	0	120	45	130	90	0	0	0	0	0	0	1	1	0	0	0	0	0	0
61	0	0	5	2	2	2	0	5	0	0	0	0	0	0	0	0	0	0	0	0	0	0	0	0	0	0	0	0	0	0	0	127	79	120	90	0	0	0	0	0	0	4	1	0	0	0	1	0	0
61	1	3	6	3	2	3	0	7	2	0	0	0	0	1	0	0	0	0	0	0	0	0	0	1	0	0	0	0	1	0	0	158	91	180	100	0	0	1	0	0	0	0	0	2	0	0	0	1	0
67	1	0	0	0	0	0	0	0	0	0	0	0	0	0	0	0	0	0	0	0	0	0	0	0	0	0	0	1	0	0	0	121	75	130	80	0	0	0	0	0	0	0	0	3	3	0	1	0	0
57	1	0	0	0	0	0	0	0	0	0	0	0	0	0	0	0	0	0	0	0	0	0	0	0	0	0	0	0	0	0	0	100	60	100	70	0	0	0	0	0	0	0	0	2	0	0	1	0	0
53	1	2	3	3	2	0	1	7	3	0	0	0	0	0	0	0	0	0	0	0	0	0	0	0	0	0	0	0	0	0	0	151	93	160	110	0	0	0	0	0	0	0	1	1	0	0	1	0	0
84	0	0	4	2	2	2	0	7	1	0	0	0	0	0	0	0	0	0	0	0	0	0	0	0	0	0	0	1	0	0	0	128	76	110	80	0	0	0	0	0	0	4	1	0	0	0	0	0	0
70	0	0	4	2	2	2	0	6	1	0	0	0	0	0	0	0	0	0	0	0	0	0	0	0	0	0	0	0	0	0	0	120	80	100	60	1	0	0	0	0	0	4	4	0	0	0	0	0	0
70	0	2	3	2	2	2	0	7	0	0	0	0	0	0	0	0	0	0	0	0	0	0	0	1	0	0	0	0	0	0	0	157	94	160	110	1	0	0	0	0	0	0	0	4	0	0	0	0	0
77	1	1	5	2	2	2	0	6	2	0	0	0	0	0	0	0	0	0	0	0	0	0	0	0	0	0	0	0	0	0	0	130	77	120	80	0	0	0	0	0	0	4	2	0	0	0	0	0	0
50	1	0	0	0	0	0	0	0	0	0	0	0	0	0	0	0	0	0	0	0	0	0	0	0	0	0	0	0	0	0	0	119	75	110	80	0	0	0	0	0	0	3	4	0	0	0	0	0	0
62	1	0	0	0	2	0	0	0	0	0	0	0	0	0	0	0	0	0	0	0	0	0	0	0	0	0	0	0	0	0	0	120	75	120	80	0	0	0	0	0	0	0	1	2	0	1	1	0	0
73	0	1	6	3	2	2	0	6	4	0	0	0	0	1	0	0	0	0	0	0	0	0	1	0	0	0	0	0	0	0	0	120	80	130	100	1	0	1	0	0	0	2	1	1	0	0	0	1	0
65	0	0	6	2	2	3	0	7	0	0	0	0	0	0	0	0	0	0	0	0	0	0	0	0	0	0	0	0	0	0	0	180	100	170	100	0	0	0	0	0	0	4	3	0	0	0	1	0	0
45	1	0	4	2	1	2	0	7	1	0	0	0	1	0	0	0	0	0	0	0	0	0	0	0	0	0	0	0	0	0	0	100	60	130	80	0	0	0	0	0	0	4	1	0	0	0	0	0	0
76	0	0	0	0	2	2	0	3	0	0	0	0	0	0	0	0	0	0	0	0	0	0	0	0	0	0	0	1	0	0	0	158	88	160	90	0	0	0	0	0	0	1	1	0	0	0	0	0	0
60	1	2	6	2	2	0	0	0	1	0	0	0	0	0	0	0	0	0	0	0	0	0	0	0	0	0	0	0	0	0	0	100	63	90	60	0	0	0	0	0	0	1	1	0	0	0	0	0	0
73	1	0	0	0	0	3	0	6	0	0	0	0	0	0	0	0	0	0	0	0	0	0	0	0	0	0	0	0	0	0	0	145	110	130	80	0	0	0	0	0	0	4	1	0	0	0	0	0	0
60	1	1	0	0	2	3	0	3	0	0	0	0	0	0	0	0	0	0	1	0	0	0	0	0	0	0	0	1	0	0	0	133	82	140	90	1	0	0	1	0	0	4	1	0	0	0	1	0	0
76	0	0	3	2	2	0	0	0	0	0	0	0	0	0	0	0	0	0	0	0	0	0	0	0	0	0	0	1	0	0	0	120	70	110	70	1	0	1	0	0	1	4	1	0	0	0	0	0	0
64	0	2	4	2	2	2	0	2	0	0	0	0	1	0	0	0	0	0	0	0	0	0	0	1	0	0	0	0	0	0	0	157	86	180	80	0	0	0	0	0	0	1	1	4	0	0	1	0	0
62	0	0	5	2	1	2	0	7	0	0	0	0	1	0	0	0	0	0	0	0	0	0	0	0	0	0	0	1	0	0	0	150	90	140	100	0	0	0	0	0	0	2	1	0	0	0	1	0	0
65	1	2	6	2	1	3	0	7	0	0	0	0	0	0	0	0	0	0	0	0	0	0	0	0	0	0	0	1	0	0	0	171	103	180	130	1	0	0	0	0	0	4	3	0	0	0	0	0	0
66	0	0	6	3	2	2	0	3	0	0	0	0	0	0	0	0	0	0	0	0	0	0	0	1	0	0	0	0	0	0	0	120	80	180	100	0	0	0	0	0	0	0	0	3	0	0	1	0	0
83	0	0	0	0	0	2	0	7	0	0	0	0	0	0	0	0	0	0	0	0	0	0	0	0	0	0	0	0	0	0	0	134	79	120	80	0	0	1	0	0	0	4	1	0	0	0	0	1	0
65	1	2	6	2	2	2	0	5	0	0	0	0	0	0	0	0	0	0	0	0	0	0	0	0	0	0	0	0	1	0	0	145	83	140	80	0	0	0	0	0	0	1	1	0	0	0	1	0	0
52	1	0	5	2	2	0	0	0	0	0	0	0	0	0	0	0	0	0	0	0	0	0	0	0	0	0	0	0	0	0	0	93	62	80	60	0	1	0	0	0	0	4	3	0	0	0	0	0	0
60	1	1	3	2	1	0	0	0	0	0	0	0	0	0	0	0	0	0	0	0	0	0	0	0	0	0	0	1	0	0	0	94	56	90	40	1	0	0	0	0	0	2	2	0	0	0	0	0	0
74	0	0	5	2	2	2	0	4	0	0	0	0	0	0	0	0	0	0	0	0	0	0	0	0	0	0	0	0	0	0	0	142	84	150	90	0	0	0	0	0	0	4	0	0	0	0	0	0	0
68	1	0	2	1	1	1	0	2	0	0	0	0	0	0	0	0	0	0	0	0	0	0	0	0	0	0	0	0	0	0	0	130	80	130	80	1	0	0	0	0	0	2	1	1	0	0	1	0	0
70	0	0	2	2	2	3	0	7	0	0	0	0	0	0	0	0	0	0	0	0	0	0	0	1	0	0	0	0	0	0	0	134	77	130	70	0	0	0	0	0	0	4	4	4	0	0	1	0	0
73	0	0	6	2	1	2	0	7	0	0	0	0	0	0	0	0	0	0	0	0	0	0	0	0	0	0	0	0	0	0	0	120	72	110	70	0	0	0	0	0	0	4	1	0	0	0	1	0	0
57	1	0	3	2	1	0	0	0	0	0	0	0	0	0	0	0	0	0	0	0	0	0	0	0	0	0	0	0	0	0	0	110	80	90	60	0	0	0	0	0	0	4	1	0	0	0	1	0	0
75	0	0	4	2	2	2	0	7	0	0	0	0	0	0	0	0	0	0	0	0	0	0	0	0	0	0	0	0	0	0	0	137	79	130	80	0	0	1	0	0	0	4	1	0	0	0	0	1	0
61	1	0	0	0	0	0	0	0	0	0	0	0	0	0	0	0	0	0	0	0	0	0	0	0	0	0	0	0	0	0	0	80	40	80	40	0	1	0	0	0	0	0	0	3	1	0	1	0	0
61	1	1	3	2	2	0	0	0	0	0	0	0	0	0	0	0	0	0	0	0	0	0	0	1	0	0	0	0	0	0	0	121	76	130	80	0	0	0	0	0	0	0	0	3	1	0	1	0	0
65	1	0	0	0	0	2	0	7	0	0	0	0	0	0	0	0	0	0	0	0	0	0	0	0	0	0	0	0	0	0	0	127	76	110	70	1	0	0	0	0	0	4	3	1	0	1	0	0	0
56	1	3	6	2	1	2	0	7	0	0	0	0	0	0	0	0	0	0	0	0	0	0	0	0	0	0	0	0	0	0	0	135	83	140	90	0	0	0	0	0	0	0	0	2	1	0	1	0	0
65	1	1	6	2	2	0	0	0	0	0	0	0	0	0	0	0	0	0	0	0	0	0	0	1	0	0	0	1	0	0	0	127	73	130	70	0	0	0	0	0	0	1	1	1	0	0	0	0	0
65	0	1	3	2	1	0	1	7	0	0	0	0	0	0	0	0	0	0	0	0	0	0	0	1	0	0	0	0	0	0	0	107	61	90	40	0	0	0	0	0	0	1	1	3	0	0	0	0	0
67	0	0	6	2	2	2	0	7	0	0	0	0	0	0	0	0	0	0	0	0	0	0	0	0	0	0	0	0	0	0	0	110	80	120	80	0	0	0	0	0	0	0	0	3	1	0	0	0	0
67	1	1	6	2	1	3	0	7	0	0	0	0	0	0	0	0	0	0	0	0	0	0	0	0	0	0	0	0	0	0	0	160	100	160	80	0	0	0	0	0	0	2	1	0	0	0	1	0	0
70	0	0	6	2	2	2	0	6	0	0	0	0	0	0	0	0	0	0	0	0	0	0	0	1	0	0	0	0	0	0	0	158	91	170	100	0	0	0	0	0	0	4	3	0	0	1	1	0	0
62	0	1	6	2	1	2	0	7	0	0	0	0	0	0	0	0	0	0	0	0	0	0	0	0	0	0	0	0	0	0	0	140	70	100	70	1	0	0	0	0	0	4	1	2	0	0	0	0	0
63	0	0	0	0	2	0	0	0	0	0	0	0	0	0	0	0	0	0	0	0	0	0	0	1	0	0	0	0	0	0	0	110	70	100	80	0	0	1	0	0	0	0	0	4	1	0	0	1	0
82	1	0	0	0	0	2	0	7	0	0	0	0	0	0	0	0	0	0	0	0	0	0	0	0	0	0	0	0	1	0	0	106	60	80	40	1	0	1	0	0	0	0	0	3	1	1	0	1	0
64	0	0	6	2	2	3	0	3	0	0	0	0	0	0	0	0	0	0	0	0	0	0	0	1	0	0	0	0	0	0	0	155	90	160	100	0	0	0	0	0	0	3	1	0	0	1	1	0	0
70	0	0	0	0	0	0	1	6	0	0	0	0	1	0	0	0	0	0	0	0	0	0	0	0	1	0	0	0	0	0	0	151	88	150	90	0	0	1	0	0	0	1	1	2	0	0	0	1	0
76	0	0	2	1	1	3	0	4	0	0	0	0	0	0	0	0	0	0	0	0	0	0	0	0	0	0	0	0	0	0	0	90	50	70	50	0	1	0	0	0	0	4	1	0	0	0	0	0	0
70	1	1	5	2	1	2	0	7	1	0	0	0	0	0	0	0	0	0	0	0	0	0	0	0	0	0	0	0	0	0	0	40	0	40	0	0	1	1	0	0	0	0	0	2	0	0	0	1	0
43	1	0	1	1	1	3	0	3	0	0	0	0	0	0	0	0	0	0	0	0	0	0	0	0	0	0	0	0	0	0	0	100	80	140	80	0	0	0	0	0	0	0	0	4	1	1	0	0	1
54	1	1	3	1	1	1	0	2	1	0	0	0	0	0	0	0	0	0	0	0	0	0	0	0	0	0	0	0	0	0	0	80	60	40	0	0	1	0	0	0	0	0	0	2	0	0	0	0	1
54	1	2	3	2	1	0	0	0	0	0	0	0	0	0	0	0	0	0	0	0	0	0	0	0	0	0	0	0	0	0	0	43	32	0	0	0	1	0	0	0	0	0	0	4	0	0	1	0	0
57	1	0	2	1	1	1	0	3	1	0	0	0	0	0	0	0	0	0	0	0	0	0	0	0	0	0	0	0	0	0	0	106	69	110	70	1	0	0	0	0	0	4	1	0	0	0	0	0	0
62	1	3	3	2	2	3	0	6	0	0	0	0	0	0	0	0	0	0	0	0	0	0	0	0	0	0	0	0	0	0	0	80	40	60	40	0	1	0	0	0	0	2	1	0	0	0	1	0	0
76	1	1	4	2	1	0	0	0	0	0	0	0	0	0	0	0	0	0	0	0	0	0	0	0	0	0	0	1	0	0	0	150	80	139	81	0	0	0	0	0	0	4	1	0	0	0	1	0	0
72	1	3	6	2	1	2	0	6	0	0	0	0	0	0	0	0	0	0	0	0	0	0	0	1	0	0	0	1	0	0	0	120	75	110	80	0	0	1	0	0	0	0	0	4	1	0	0	1	0
73	1	3	6	2	2	2	0	7	0	0	0	0	0	0	0	0	0	0	0	0	0	0	0	0	0	0	0	0	0	0	0	150	90	80	50	1	1	0	0	0	0	4	1	0	0	0	1	0	0
75	1	1	6	2	2	0	0	0	0	0	0	0	0	0	0	0	0	0	0	0	0	0	0	0	0	0	0	0	0	0	0	128	75	140	80	0	0	0	0	0	0	4	4	2	0	0	1	0	0
64	0	1	5	2	1	2	0	7	0	0	0	0	0	0	0	0	0	0	0	0	0	0	0	0	0	0	0	0	0	0	0	170	120	130	90	0	0	0	0	0	0	4	1	0	0	0	0	0	0
79	0	0	6	2	2	2	0	7	0	0	0	0	0	0	0	0	0	0	0	0	0	0	0	1	0	0	0	0	0	0	0	150	90	120	80	0	0	0	0	0	0	4	1	0	0	0	0	0	0
65	0	2	4	2	1	2	0	7	3	0	0	0	0	0	0	0	0	0	0	0	0	0	0	0	0	0	0	1	0	0	0	157	88	180	90	0	0	0	0	0	0	2	1	1	0	0	0	0	0
72	0	2	3	2	1	2	0	6	3	0	0	0	0	0	0	0	0	0	0	0	0	0	0	0	0	0	0	1	0	0	0	149	83	160	80	0	0	0	0	0	0	2	1	1	0	0	1	0	0
65	0	0	6	2	1	2	0	6	0	0	0	0	0	0	0	0	0	0	0	0	0	0	0	0	1	0	0	1	0	0	0	180	100	160	100	0	0	0	0	0	0	4	1	0	0	0	1	0	0
78	1	0	0	0	2	0	0	0	2	0	0	0	0	0	0	0	0	0	0	0	0	0	0	0	0	0	0	1	0	0	0	100	63	80	60	0	0	0	0	0	0	4	4	0	0	0	0	0	0
41	1	0	0	0	2	0	0	0	0	0	0	0	0	0	0	0	0	0	0	0	0	0	0	0	0	0	0	0	0	0	0	133	83	170	90	0	0	0	0	0	0	0	0	2	0	1	0	0	0
77	0	1	0	0	2	3	0	7	0	0	0	0	0	0	0	0	0	0	0	0	0	0	0	0	0	0	0	0	0	0	0	148	84	140	80	1	0	0	0	0	0	2	1	1	0	0	1	0	0
80	0	1	4	2	1	2	0	5	1	0	0	0	0	0	0	0	0	0	0	0	0	0	0	0	0	0	0	0	0	0	0	93	51	60	20	1	1	0	0	0	0	0	0	4	0	1	0	0	0
81	0	1	5	2	2	2	0	5	0	0	0	0	0	0	0	0	0	0	0	0	0	0	0	0	0	0	0	0	0	0	0	60	0	50	0	0	1	0	0	1	0	1	0	1	0	0	1	0	0
63	1	1	6	2	2	0	0	0	0	0	0	0	0	0	0	0	0	0	0	0	0	0	0	0	0	0	0	0	0	0	0	126	79	120	90	0	0	0	0	0	0	4	1	0	0	0	0	0	0
66	0	3	4	2	2	0	1	5	1	0	0	0	0	0	0	0	0	0	0	0	0	0	0	1	0	0	0	0	0	0	0	90	60	20	0	1	1	0	0	0	0	0	0	2	0	0	0	0	1
78	0	0	6	2	1	3	0	7	1	0	0	0	0	1	0	0	0	0	0	0	0	0	0	1	0	0	0	0	0	0	0	130	70	210	110	0	0	1	0	0	0	4	1	4	0	0	0	1	0
56	1	3	6	2	2	2	0	7	0	0	0	0	0	0	0	0	0	0	0	0	0	0	0	0	0	0	0	1	0	0	0	119	76	120	80	0	0	0	0	0	0	2	1	1	0	0	1	0	0
66	0	0	3	1	1	2	0	7	0	0	0	0	0	0	0	0	0	0	0	0	0	0	0	0	0	0	0	1	0	0	0	136	77	120	70	0	0	1	0	0	0	4	2	0	0	0	1	0	0
61	0	1	2	2	2	2	0	7	1	0	0	0	0	0	0	0	0	0	0	0	0	0	0	0	0	0	0	0	0	0	0	122	74	110	70	0	0	0	0	0	0	0	3	1	0	0	0	0	0
62	0	0	0	0	0	2	0	7	0	0	0	0	0	0	0	0	0	0	0	0	0	0	0	1	0	0	0	0	0	0	0	96	59	70	40	0	1	0	0	0	0	4	1	0	0	0	0	0	0
84	0	0	0	0	0	2	0	5	0	0	0	0	0	0	0	0	0	0	0	0	0	0	0	0	0	0	0	0	0	0	0	130	90	160	80	0	0	0	0	0	0	4	1	0	0	0	1	0	0
60	1	1	2	2	1	0	0	0	0	0	0	0	0	0	0	0	0	0	0	0	0	0	0	0	0	0	0	1	0	0	0	80	60	60	40	0	1	0	0	0	0	1	1	0	0	0	0	0	0
64	0	0	2	1	1	0	0	0	0	0	0	0	0	0	0	0	0	0	0	0	0	0	0	0	0	0	0	0	0	0	0	42	30	0	0	0	0	0	0	0	1	4	2	0	0	0	0	0	0
60	0	3	6	3	2	2	0	7	3	0	0	0	0	0	0	0	0	0	0	0	0	0	0	0	0	1	0	0	0	0	0	127	78	110	80	0	0	0	0	0	0	1	1	1	0	1	0	0	0
67	0	0	6	2	1	2	0	6	0	0	0	0	0	0	0	0	0	0	0	0	0	0	0	0	0	0	0	0	0	0	0	80	60	120	80	0	0	0	0	0	0	4	4	0	0	1	0	0	0
53	1	1	5	3	2	0	0	0	2	0	0	0	1	0	0	0	0	0	0	0	0	0	0	0	0	0	0	0	0	0	0	80	60	60	40	1	1	1	0	0	0	0	0	4	0	0	0	1	0
62	1	0	4	2	2	2	0	7	0	0	0	0	0	0	0	0	0	0	0	0	0	0	0	1	0	0	0	0	0	0	0	136	81	130	80	0	0	0	0	0	0	1	1	1	1	0	1	0	0
65	1	0	1	2	1	2	0	4	0	0	0	0	0	0	0	0	0	0	0	0	0	0	0	0	0	0	0	0	0	0	0	130	79	120	80	0	0	0	0	0	0	4	3	0	0	0	0	0	0
55	1	0	2	1	1	3	0	6	0	0	0	0	0	0	0	0	0	0	0	0	0	0	0	0	0	0	0	0	0	0	0	121	77	120	80	1	0	0	0	0	0	3	1	0	0	0	1	0	0
53	1	0	5	2	2	0	1	6	0	0	0	0	0	0	0	0	0	0	0	0	0	0	0	1	0	0	0	0	0	0	0	127	80	130	90	0	0	0	0	0	0	4	1	0	0	0	0	0	0
73	0	0	5	2	2	2	0	6	0	0	0	0	0	0	0	0	0	0	0	0	0	0	0	0	0	0	0	0	0	0	0	60	0	60	40	1	1	0	0	0	0	2	1	0	0	0	0	0	0
62	1	1	1	2	1	2	0	4	0	0	0	0	0	0	0	0	0	0	0	0	0	0	0	0	0	0	0	0	0	0	0	52	35	0	0	1	1	0	0	0	0	4	2	2	0	0	0	0	0
65	1	3	6	2	2	0	0	0	0	0	0	0	0	0	0	0	0	0	0	0	0	0	0	0	0	0	0	0	0	0	0	120	70	90	60	0	0	0	0	0	0	1	1	2	0	0	0	0	0
70	1	1	3	2	1	0	1	5	3	0	0	0	0	0	0	0	0	0	0	0	0	0	0	0	0	0	0	0	1	0	0	123	73	120	70	1	0	0	0	0	0	4	3	0	0	0	0	0	0
80	1	0	6	2	2	0	0	0	1	0	0	0	0	0	0	0	0	0	0	0	0	0	0	0	0	0	0	0	1	0	0	122	73	120	80	0	0	0	0	0	0	4	1	0	0	0	0	0	0
67	1	2	3	2	2	2	0	5	1	0	0	0	0	0	0	0	0	0	0	0	0	0	0	0	1	0	0	0	0	0	0	151	87	160	90	0	0	0	0	0	0	0	1	4	0	0	0	0	0
73	0	1	6	2	2	2	0	6	1	0	0	0	0	0	0	0	0	0	0	0	0	0	0	0	0	0	0	1	0	0	0	173	92	200	90	1	0	0	0	0	0	0	0	2	0	0	1	0	0
51	1	2	6	2	2	0	0	0	2	0	0	0	0	0	0	0	0	0	0	0	0	0	0	0	0	0	0	1	0	0	0	0	0	0	0	0	1	0	0	0	0	1	1	1	0	0	0	0	0
44	1	0	0	0	2	0	0	0	0	0	0	0	0	0	0	0	0	0	0	0	0	0	0	0	0	0	0	1	0	0	0	108	71	110	70	0	0	0	0	0	0	4	1	0	0	0	1	0	0
63	1	0	6	2	2	0	0	0	0	0	0	0	0	0	0	0	0	0	0	0	0	0	0	1	0	0	0	0	0	0	0	106	65	100	60	0	0	0	0	0	0	0	2	4	0	0	1	0	0
80	0	0	0	0	0	2	0	5	1	0	0	0	0	0	0	0	0	0	0	0	0	0	0	0	0	0	0	0	0	0	0	100	80	110	80	0	0	1	0	0	0	0	0	3	0	0	0	1	0
85	0	2	6	2	1	2	0	7	1	0	0	0	0	0	0	0	0	0	0	0	0	0	0	1	0	0	0	0	0	0	0	167	95	190	110	0	0	0	0	0	0	2	1	1	0	0	1	0	0
84	0	0	6	2	1	2	0	7	0	0	0	0	0	0	0	0	0	0	0	0	0	0	0	0	0	0	0	0	0	0	0	160	100	150	70	0	0	0	0	0	0	0	0	4	1	1	1	0	0
80	0	0	4	2	1	3	0	6	1	0	0	0	0	1	0	0	0	0	0	0	0	0	0	0	0	0	0	1	0	0	0	140	90	130	80	0	0	1	0	0	0	0	1	2	0	0	0	1	0
75	0	0	0	0	2	0	0	0	0	0	0	0	0	0	0	0	0	0	0	0	0	0	0	0	0	0	0	1	0	0	0	110	70	100	50	0	0	0	0	0	0	4	1	0	0	0	1	0	0
77	0	0	2	2	1	3	0	8	1	0	0	0	0	0	0	0	0	0	0	0	0	0	0	1	1	0	0	0	0	0	0	260	120	160	120	0	0	0	0	0	0	4	1	0	0	0	0	0	0
57	1	1	3	2	1	2	0	4	1	0	0	0	0	0	0	0	0	0	0	0	0	0	0	0	0	0	0	0	0	0	0	140	90	130	90	0	0	0	0	0	0	4	1	0	0	0	1	0	0
68	1	0	0	0	0	0	0	0	1	0	0	0	0	0	0	0	0	0	0	0	0	0	0	0	0	0	0	1	0	0	0	79	51	60	40	1	1	0	1	0	0	4	2	0	0	0	1	0	0
51	1	1	6	2	1	2	0	4	0	0	0	0	0	0	0	0	0	0	0	0	0	0	0	0	0	0	0	1	0	0	0	100	80	120	80	0	0	0	0	0	0	0	0	2	1	0	1	0	0
58	1	3	6	2	2	2	0	7	0	0	0	0	0	0	0	0	0	0	0	0	0	0	0	0	0	0	0	1	0	0	0	132	83	130	90	0	0	0	0	0	0	0	1	3	1	0	1	0	0
67	0	0	0	0	2	3	0	7	0	0	0	0	0	0	0	0	0	0	0	0	0	0	0	1	0	0	0	0	0	0	0	147	87	140	90	0	0	0	0	0	0	3	1	1	0	0	0	0	0
67	0	0	6	2	1	2	0	7	0	0	0	0	0	0	0	0	0	0	0	0	0	0	0	0	0	0	0	0	0	0	0	128	78	120	80	0	0	0	0	0	0	4	2	0	0	0	0	0	0
67	0	1	6	2	1	2	0	7	0	0	0	0	0	0	0	0	0	0	0	0	0	0	0	0	0	0	0	0	0	0	0	128	81	120	90	1	0	0	0	0	0	4	1	0	0	0	1	0	0
72	0	0	4	2	1	2	0	5	2	0	0	0	0	0	0	0	0	0	0	0	0	0	0	0	0	0	0	1	0	0	0	140	80	130	80	0	0	1	0	0	0	4	4	0	0	0	0	1	0
55	0	3	6	2	2	2	0	4	2	0	0	0	0	0	0	0	0	0	0	0	0	0	0	1	0	0	0	0	0	0	0	105	66	95	60	0	0	0	0	0	0	2	1	1	0	0	0	0	0
64	0	0	1	2	2	0	0	0	0	0	0	0	0	0	0	0	0	0	0	0	0	0	0	0	0	0	0	0	0	0	0	101	64	80	60	0	1	0	0	0	0	0	0	2	1	0	0	0	0
63	0	3	2	2	1	2	0	5	0	0	0	0	0	0	0	0	0	0	0	0	0	0	0	1	0	0	0	0	0	0	0	123	75	110	70	1	0	0	0	0	0	0	0	2	0	0	1	0	0
57	0	0	2	1	1	0	0	0	0	0	0	0	0	0	0	0	0	0	0	0	0	0	0	0	1	0	0	0	0	0	0	80	30	60	40	0	1	1	0	0	0	0	0	3	1	0	0	1	0
75	1	1	4	1	1	1	0	3	1	0	0	0	0	0	0	0	0	0	0	0	0	0	0	0	0	0	0	0	0	0	0	105	65	90	60	0	0	0	0	0	0	0	0	3	1	0	0	0	0
65	0	0	0	0	0	0	0	0	4	0	0	0	0	0	0	0	0	0	0	0	0	0	0	0	0	0	0	0	1	0	0	95	62	90	60	0	0	0	0	0	0	0	0	2	1	0	1	0	0
70	1	1	4	2	1	2	0	4	0	0	0	0	0	0	0	0	0	0	0	0	0	0	0	0	0	0	0	1	0	0	0	56	35	0	0	0	1	0	0	0	0	0	0	3	0	0	0	0	1
63	0	0	6	2	2	2	0	7	0	0	0	0	0	0	0	0	0	0	0	0	0	0	0	0	1	0	0	0	0	0	0	127	77	130	80	0	0	0	0	0	0	2	1	1	0	0	1	0	0
82	0	1	2	1	1	0	0	0	1	0	0	0	0	0	0	0	0	0	0	0	0	0	0	0	0	0	0	0	0	0	0	90	70	60	0	1	1	0	0	0	0	4	1	0	0	0	0	0	0
72	0	1	5	2	1	2	0	5	2	0	0	0	0	0	0	0	0	0	0	0	0	0	0	0	0	0	0	0	0	0	0	70	40	70	30	0	1	1	0	0	0	1	1	1	0	0	0	1	0
69	0	1	2	2	2	0	0	0	4	0	0	0	0	0	0	0	0	0	0	0	0	0	0	0	0	0	0	0	0	0	0	83	47	50	20	1	1	0	0	0	0	2	1	1	0	0	0	0	0
64	0	1	0	0	2	2	0	7	0	0	0	0	0	0	0	0	0	0	0	0	0	0	0	0	0	0	0	0	0	0	0	90	60	110	80	0	0	0	0	0	0	0	0	2	1	0	1	0	0
77	1	0	0	0	0	2	0	7	4	0	0	0	0	0	0	0	0	0	0	0	0	0	0	0	0	0	0	0	0	0	0	160	90	180	90	0	0	0	0	0	0	4	1	0	0	0	1	0	0
59	1	0	0	0	0	0	0	0	0	0	0	0	0	0	0	0	0	0	0	0	0	0	0	0	0	0	0	0	0	0	0	103	66	90	60	0	0	1	0	0	0	0	0	3	4	0	0	0	0
65	1	1	6	2	1	0	0	0	0	0	0	0	0	0	0	0	0	0	0	0	0	0	1	0	0	0	0	0	0	0	0	92	58	70	50	0	1	0	0	0	0	2	1	1	0	0	0	0	0
68	1	1	4	2	2	2	0	5	0	0	0	0	0	0	0	0	0	0	0	0	0	0	0	0	0	0	0	0	0	0	0	164	96	170	110	0	0	0	0	0	0	2	1	1	0	0	1	0	0
50	1	2	3	3	2	0	0	0	4	0	0	0	0	0	0	0	0	0	0	0	0	0	0	0	0	0	0	0	0	0	0	120	80	130	80	0	0	0	0	0	1	4	2	0	0	0	1	0	0
87	1	2	6	2	1	2	0	6	1	0	0	0	0	0	0	0	0	0	0	0	0	0	0	0	0	0	0	0	0	0	0	121	71	110	70	0	0	0	0	0	0	0	0	2	0	0	0	0	0
75	0	1	6	2	1	2	0	6	0	0	0	0	0	0	0	0	0	0	0	0	0	0	0	0	0	0	0	0	0	0	0	153	89	160	100	0	0	0	0	0	0	0	0	0	2	0	1	0	0
68	1	0	0	0	0	0	0	0	0	0	0	0	0	0	0	0	0	0	0	0	0	0	0	0	0	0	0	0	0	0	0	120	80	90	40	0	0	0	0	0	0	2	1	1	0	0	1	0	0
64	1	3	6	3	1	2	0	5	3	0	0	0	1	0	0	0	0	0	0	0	0	0	0	0	0	0	0	0	0	0	0	110	70	160	80	0	0	0	0	0	0	4	3	0	0	0	0	0	0
75	1	1	3	2	2	2	0	6	4	0	0	1	0	0	0	0	0	0	0	0	0	0	0	0	0	0	0	0	1	0	0	70	40	80	40	0	0	0	0	0	0	4	0	0	0	0	1	0	0
66	1	0	4	2	2	2	0	7	0	0	0	0	0	0	0	0	0	0	0	0	0	0	0	0	1	0	0	0	0	0	0	131	76	120	70	0	0	0	0	0	0	4	3	0	0	0	0	0	0
70	0	0	3	2	1	2	0	7	4	0	0	0	0	1	0	0	0	0	0	0	0	0	0	0	0	0	0	0	0	0	0	73	40	60	0	0	1	1	0	0	0	1	0	2	1	0	0	1	0
75	0	1	6	2	1	2	0	6	1	0	0	0	0	0	0	0	0	0	0	0	0	0	0	1	0	0	0	0	1	0	0	140	80	140	80	0	0	0	0	0	0	0	0	1	0	0	1	0	0
76	0	0	3	2	1	2	0	6	4	0	0	0	0	0	0	0	0	0	0	0	0	0	0	0	0	0	0	0	0	0	0	153	89	160	100	0	0	0	0	0	0	4	3	0	0	0	0	0	0
55	0	0	0	0	2	0	0	0	2	0	0	0	0	0	0	0	0	0	0	0	0	0	0	0	0	0	0	0	1	0	0	118	76	120	80	0	0	0	0	0	0	3	1	0	0	0	0	0	0
57	1	3	6	2	1	2	0	6	2	0	0	0	0	0	0	0	0	0	0	0	0	0	0	1	0	0	0	1	0	0	0	122	74	110	70	0	0	0	0	0	0	0	0	1	0	0	1	0	0
78	0	1	6	2	1	0	0	0	0	0	0	0	0	0	0	0	0	0	0	0	0	0	0	0	0	0	0	0	0	0	0	133	78	140	80	0	0	0	0	0	0	0	0	3	1	0	1	0	0
56	1	2	6	2	2	2	0	6	0	0	0	0	0	0	0	0	0	0	0	0	0	0	0	0	0	0	0	0	0	0	0	130	76	130	70	0	0	0	0	0	0	1	1	1	0	0	0	0	0
68	0	0	0	0	0	2	0	7	0	0	0	0	0	0	0	0	0	0	0	0	0	0	0	0	0	0	0	0	0	0	0	210	120	180	110	0	0	0	0	0	0	4	1	0	0	0	1	0	0
66	1	1	5	2	2	2	0	5	0	0	0	0	0	0	0	0	0	0	0	0	0	0	0	0	0	0	0	0	0	0	0	70	50	170	90	0	0	1	0	0	0	4	1	0	0	0	0	1	0
76	1	1	6	2	2	2	0	5	2	0	0	0	0	0	0	0	0	0	0	0	0	0	0	0	0	0	0	1	0	0	0	80	40	40	0	1	1	0	0	0	0	0	0	2	0	0	0	0	0
46	0	0	2	1	1	0	0	0	0	0	0	0	0	0	0	0	0	0	0	0	0	0	0	0	0	0	0	0	0	0	0	50	0	0	0	1	1	0	0	0	0	2	1	2	1	1	1	0	0
83	0	0	0	0	0	3	0	7	0	0	0	0	0	0	0	0	0	0	0	0	0	0	0	0	0	0	0	0	0	0	0	138	81	130	80	0	0	0	0	0	0	4	2	0	0	0	1	0	0
66	1	0	2	2	1	2	0	4	0	0	0	0	0	0	0	0	0	0	0	0	0	0	0	0	0	0	0	0	0	0	0	135	79	140	80	0	0	1	0	0	0	3	1	2	0	0	0	1	0
60	1	0	2	2	1	0	0	0	0	0	0	0	0	0	0	0	0	0	0	0	0	0	0	0	0	0	0	1	0	0	0	72	40	60	0	0	1	0	0	0	0	4	1	0	0	1	0	0	1
70	0	1	6	2	2	2	0	7	4	0	0	0	0	0	0	0	0	0	0	0	0	0	0	1	0	0	0	0	0	0	0	156	90	160	100	0	0	0	0	0	0	2	1	1	0	0	0	0	0
78	0	1	2	2	1	2	0	7	0	0	0	0	0	0	0	0	0	0	0	0	0	0	0	0	0	0	0	1	0	0	0	140	60	140	80	0	0	0	0	0	0	0	0	2	0	0	1	0	0
75	1	0	6	2	1	2	0	2	0	0	0	0	0	0	0	0	0	0	0	0	0	0	0	0	0	0	0	0	0	0	0	129	71	130	60	0	0	0	0	0	0	0	0	2	0	0	1	0	0
60	1	0	0	0	0	0	0	0	0	0	0	0	0	0	0	0	0	0	0	0	0	0	0	0	0	0	0	0	0	0	0	122	76	120	80	0	0	0	0	0	0	4	1	0	0	0	1	0	0
57	1	1	3	2	2	0	0	0	0	0	0	0	0	0	0	0	0	0	0	0	0	0	0	0	0	0	0	0	1	0	0	90	60	100	70	0	0	0	0	0	0	4	1	0	0	0	1	0	0
63	1	0	0	0	0	2	0	7	0	0	0	0	0	0	0	0	0	0	0	0	0	0	0	0	1	0	0	1	0	0	0	140	90	90	60	0	0	0	0	0	0	2	1	0	0	0	1	0	0
75	0	1	5	2	1	2	0	6	3	0	0	0	0	0	0	0	0	0	0	0	0	0	0	0	0	0	0	0	0	0	0	142	81	140	80	0	0	0	0	0	0	4	1	0	0	0	1	0	0
76	0	0	4	2	1	2	0	7	0	0	0	0	0	0	0	0	0	0	0	0	0	0	0	0	0	0	0	0	0	0	0	140	80	130	80	0	0	0	0	0	0	4	1	0	0	0	0	0	0
61	1	3	6	2	2	2	0	6	4	0	0	0	0	0	0	0	0	0	0	0	0	0	0	0	0	0	0	0	0	0	0	117	74	120	80	0	0	0	0	0	0	4	2	0	1	0	0	0	0
61	0	1	5	2	2	2	0	4	2	0	0	0	0	0	0	0	0	0	0	0	0	0	0	0	0	0	0	0	0	0	0	90	60	80	50	0	1	0	0	0	0	2	1	1	0	0	0	0	0
73	1	1	6	2	1	3	0	4	0	0	0	0	0	0	0	0	0	0	0	0	0	0	0	0	0	0	0	0	1	0	0	150	90	140	90	0	0	0	0	0	0	0	1	4	1	0	1	0	0
66	0	0	5	1	1	3	0	6	1	0	0	0	0	1	0	0	0	0	0	0	0	0	0	0	0	0	0	0	0	0	0	130	79	130	80	0	0	1	0	0	0	4	1	0	0	0	0	1	0
88	0	2	6	2	2	2	0	6	1	0	0	0	0	0	0	0	0	0	0	0	0	0	0	0	0	0	0	0	0	0	0	132	77	120	80	0	0	0	0	0	0	4	1	0	0	0	1	0	0
85	1	1	0	0	0	3	0	7	0	0	0	0	0	0	0	0	0	0	0	0	0	0	0	1	0	0	0	0	0	0	0	157	87	160	90	0	0	0	0	0	0	0	0	4	0	0	0	0	1
54	0	2	6	3	1	2	0	7	0	0	0	0	1	0	0	0	0	0	0	0	0	0	0	1	1	0	0	0	0	0	0	118	73	110	70	0	0	0	0	0	0	0	0	4	0	0	0	0	0
77	1	1	5	2	2	2	0	7	2	0	0	0	0	0	0	0	0	0	0	0	0	0	0	0	0	0	0	0	1	0	0	123	72	110	70	0	0	0	0	0	0	0	0	2	0	0	1	0	0
53	1	1	2	1	2	0	0	0	0	0	0	0	0	0	0	0	0	0	0	0	0	0	0	0	0	0	0	0	0	0	0	116	72	110	70	1	0	0	0	0	0	4	2	0	0	0	1	0	0
77	1	0	0	0	0	2	0	4	0	0	0	0	0	0	0	0	0	0	0	0	0	0	0	0	0	0	0	0	0	0	0	146	82	140	80	0	0	0	0	0	0	0	0	4	0	0	1	0	0
62	1	0	0	0	0	0	1	7	0	0	0	0	0	0	0	0	0	0	0	0	0	0	0	0	1	0	0	0	0	0	0	140	82	140	80	0	0	0	0	0	0	4	1	0	0	0	1	0	0
71	0	0	6	2	2	2	0	7	0	0	0	0	0	0	0	0	0	0	0	0	0	0	0	0	0	0	0	0	0	0	0	129	75	110	70	0	0	0	0	0	0	4	2	0	0	0	1	0	0
70	0	0	2	2	1	2	0	7	0	0	0	0	0	0	0	0	0	0	0	0	0	0	0	0	0	0	0	0	0	0	0	141	82	140	80	0	0	0	0	0	0	4	1	0	0	0	1	0	0
77	0	0	0	0	0	2	0	7	0	0	0	0	0	0	0	0	0	0	0	0	0	0	0	0	0	0	0	0	0	0	0	154	88	150	90	0	0	0	0	0	0	4	1	0	0	0	1	0	0
77	0	0	4	2	1	2	0	7	0	0	0	0	0	0	0	0	0	0	0	0	0	0	0	0	0	0	0	0	0	0	0	127	74	110	70	0	0	0	0	0	0	4	1	0	0	0	1	0	0
70	0	0	6	2	1	2	0	7	0	0	0	0	0	0	0	0	0	0	0	0	0	0	0	0	0	0	0	1	0	0	0	80	42	50	0	0	1	0	0	0	0	0	0	2	1	0	1	0	0
55	1	3	6	2	2	0	0	0	0	0	0	0	0	0	0	0	0	0	0	0	0	0	0	0	0	0	0	0	0	0	0	84	57	70	50	0	0	0	0	0	0	4	1	0	0	0	1	0	0
79	0	2	2	2	1	2	0	7	1	0	0	0	0	1	0	0	0	0	0	0	0	0	0	0	0	0	0	0	0	0	0	128	75	110	70	0	0	1	0	0	0	2	1	2	0	0	0	1	0
63	1	2	4	2	2	2	0	4	4	0	0	0	0	0	0	1	0	0	0	0	0	0	0	0	0	0	0	1	0	0	0	47	33	0	0	0	1	0	0	0	1	0	0	2	0	0	0	0	0
[truncated: 69 more columns]
